# Supplementary material for: Chemically Modified Poly(A) Analogs Targeting PABP: Structure Activity Relationship and Translation Inhibitory Properties
Source: PubMed Central journal article supplement — Chemistry. 2022 Jun 10;28(42):e202201115. doi: 10.1002/chem.202201115 (PMC9400960; doi:10.1002/chem.202201115), 2022-06-10

# Chemistry–A European Journal

Supporting Information

## **Chemically Modified Poly(A) Analogs Targeting PABP: Structure Activity Relationship and Translation Inhibitory Properties**

Olga Perzanowska, Mirosław Smietanski, Jacek Jemielity,\* and Joanna Kowalska\*

**Table of contents**

Supplementary figures.....S3  
HPLC profiles and HR-MS.....S5  
MST traces and binding curves.....S61

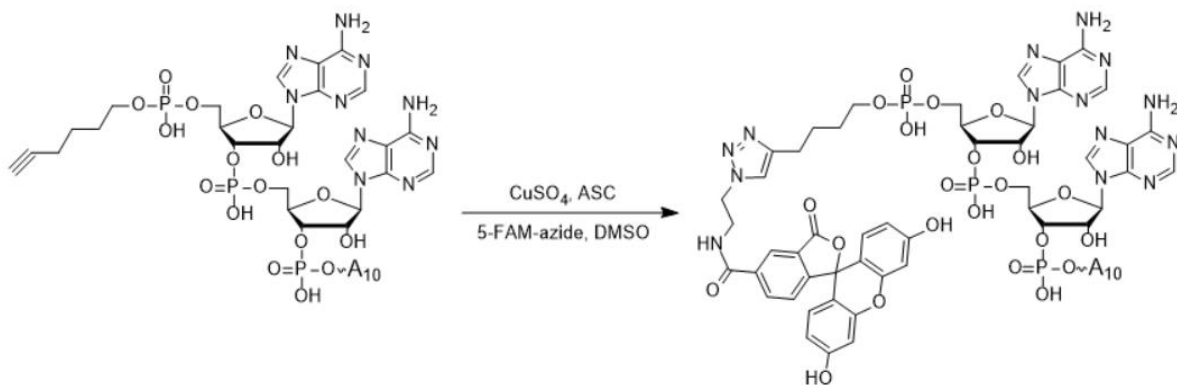

**Figure S1.** 5'-FAM-A<sub>12</sub> synthesis via CuAAC click chemistry.

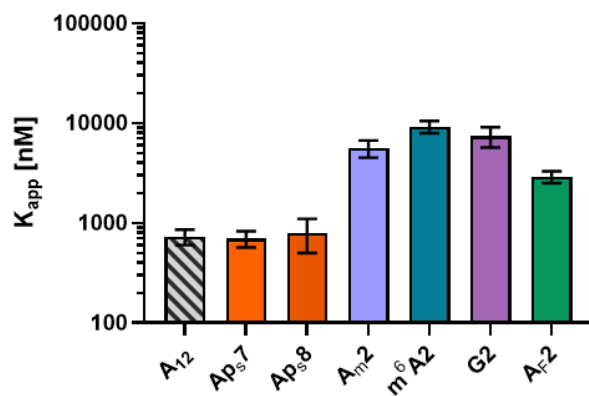

**Figure S2.** Apparent binding values ( $K_{D,app}$ ) for complexes between PABP and poly(A) analogs containing different modifications in the middle part of the oligoadenylate chain.

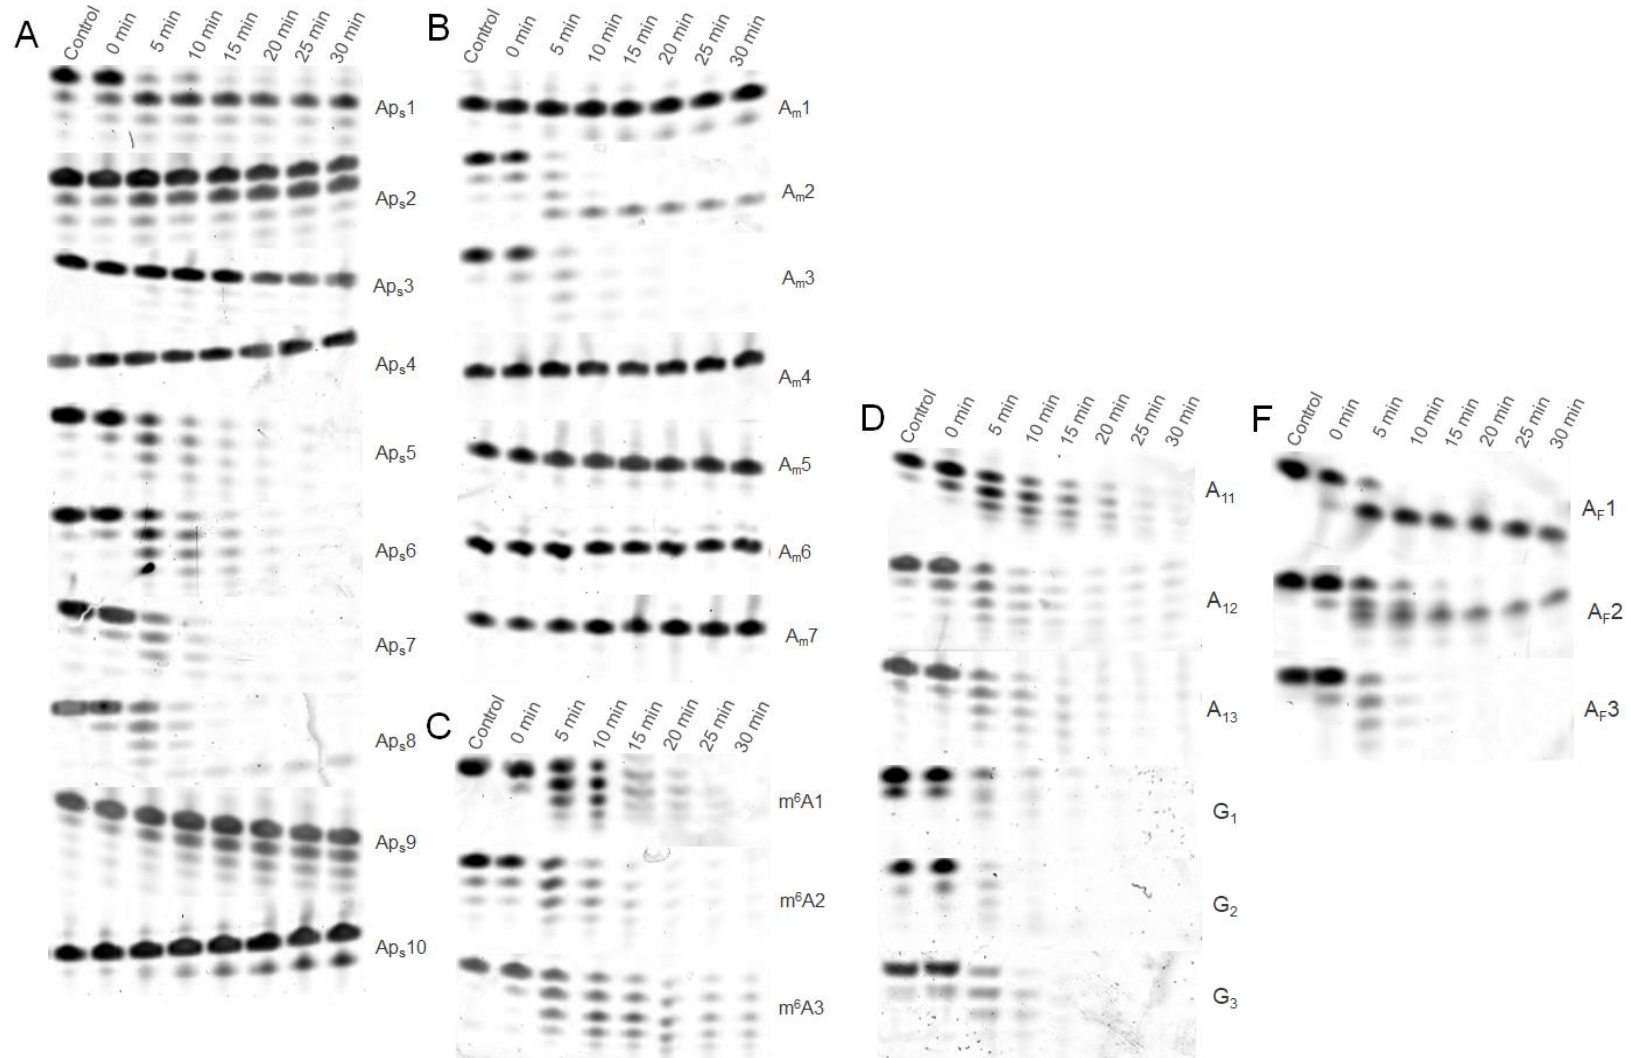

**Figure S3.** Urea polyacrylamide gel electrophoresis separation of products of degradation by CNOT7 deadenylase. Poly(A) analogs were incubated with CNOT7 for 30 minutes in 37°C. Reaction was stopped every 5 minutes by diluting a portion of the reaction mixture with loading dye and EDTA. Control sample was incubated for 30 minutes in 37°C without enzyme. A) Thiophosphate modification. B) 2'O-Me ribose modification. C) m<sup>6</sup>A nucleobase modification. D) Guanosine for adenosine substitution and different length of unmodified analogs. E) 2'F ribose modification.

FAM-A12

Chemical structure

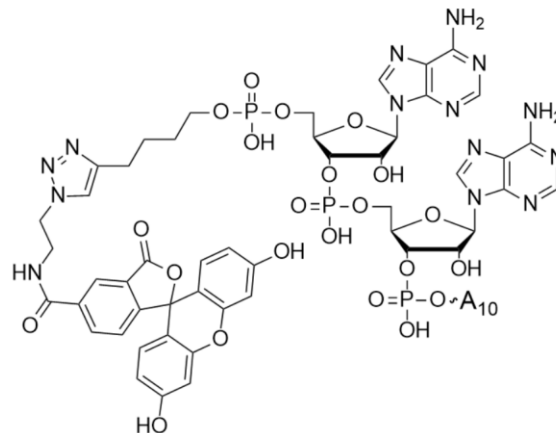

FAM-A12

RP HPLC

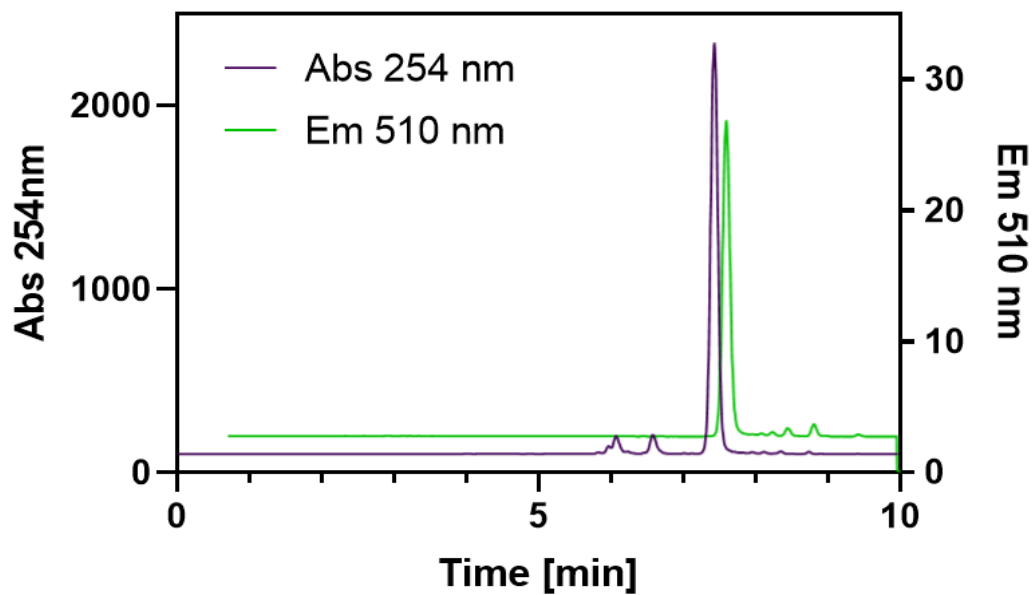

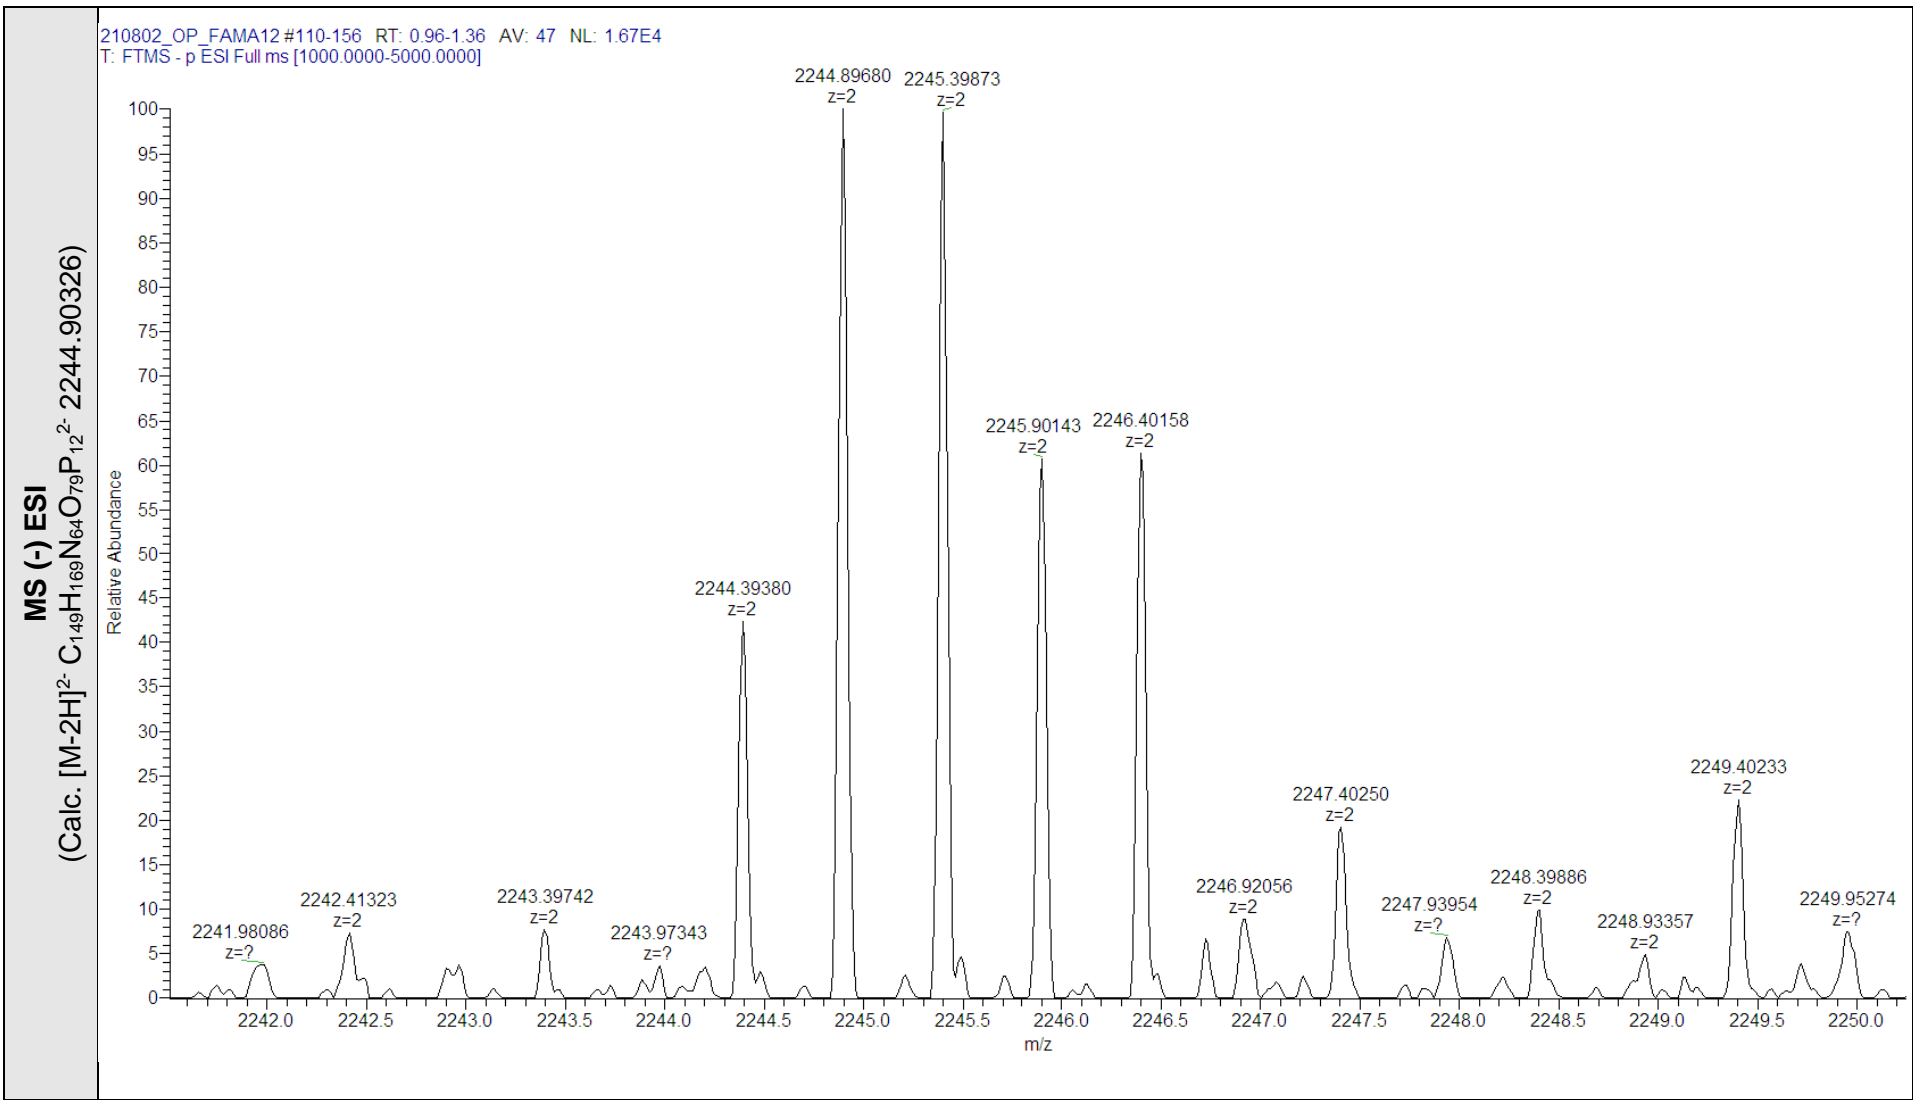

**A<sub>9</sub>Ap<sub>s</sub>A<sub>2</sub> D1/D2 (Ap<sub>s</sub>1/Ap<sub>s</sub>2)**

Chemical structure

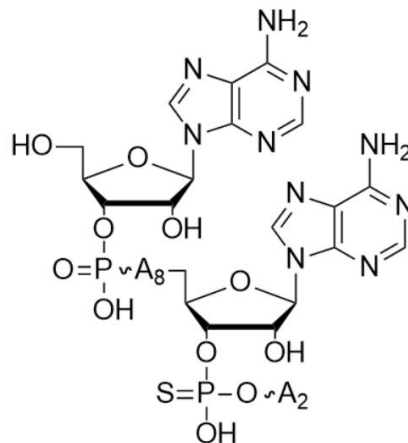

RP HPLC

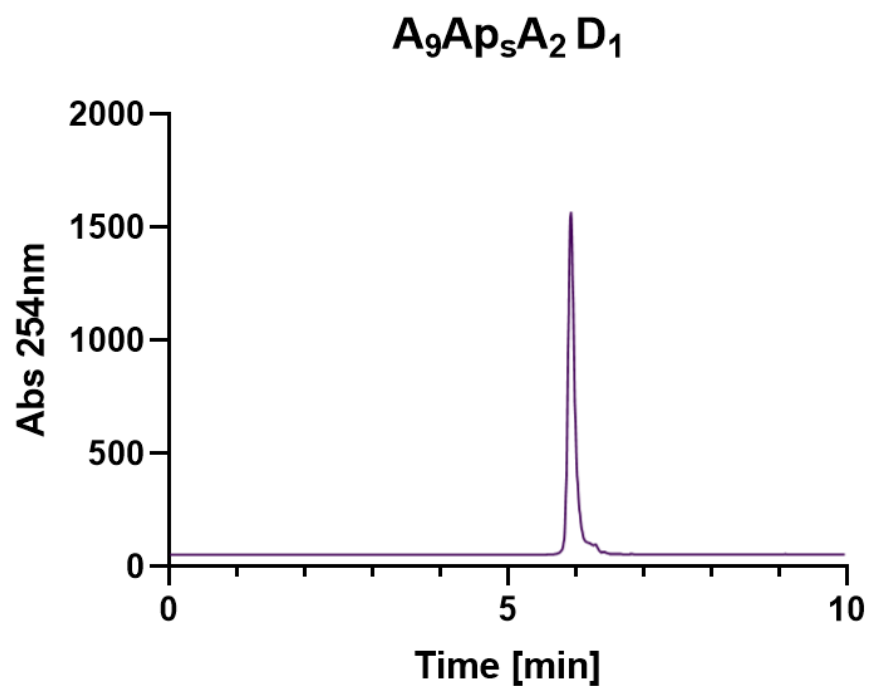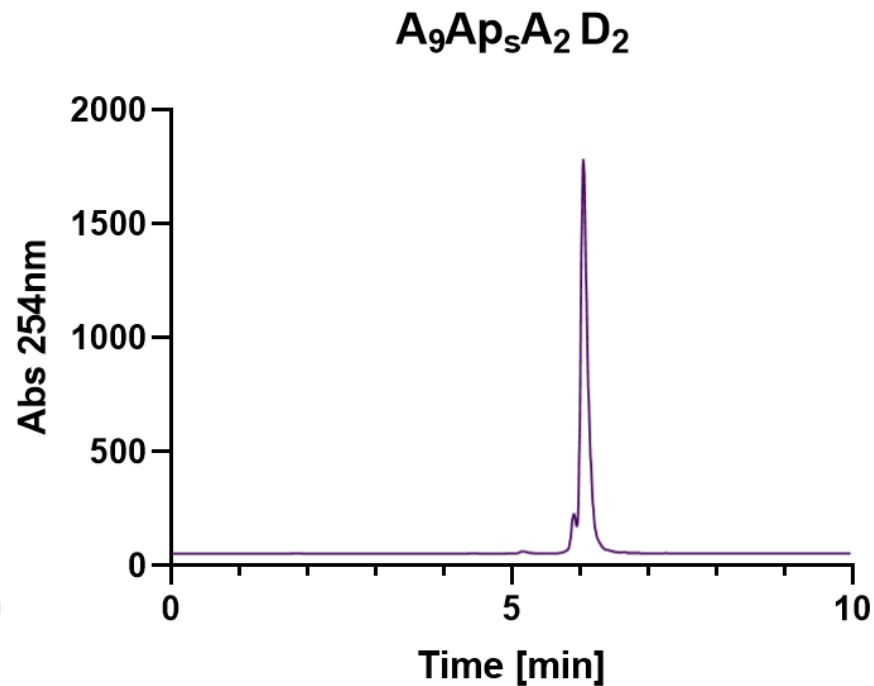

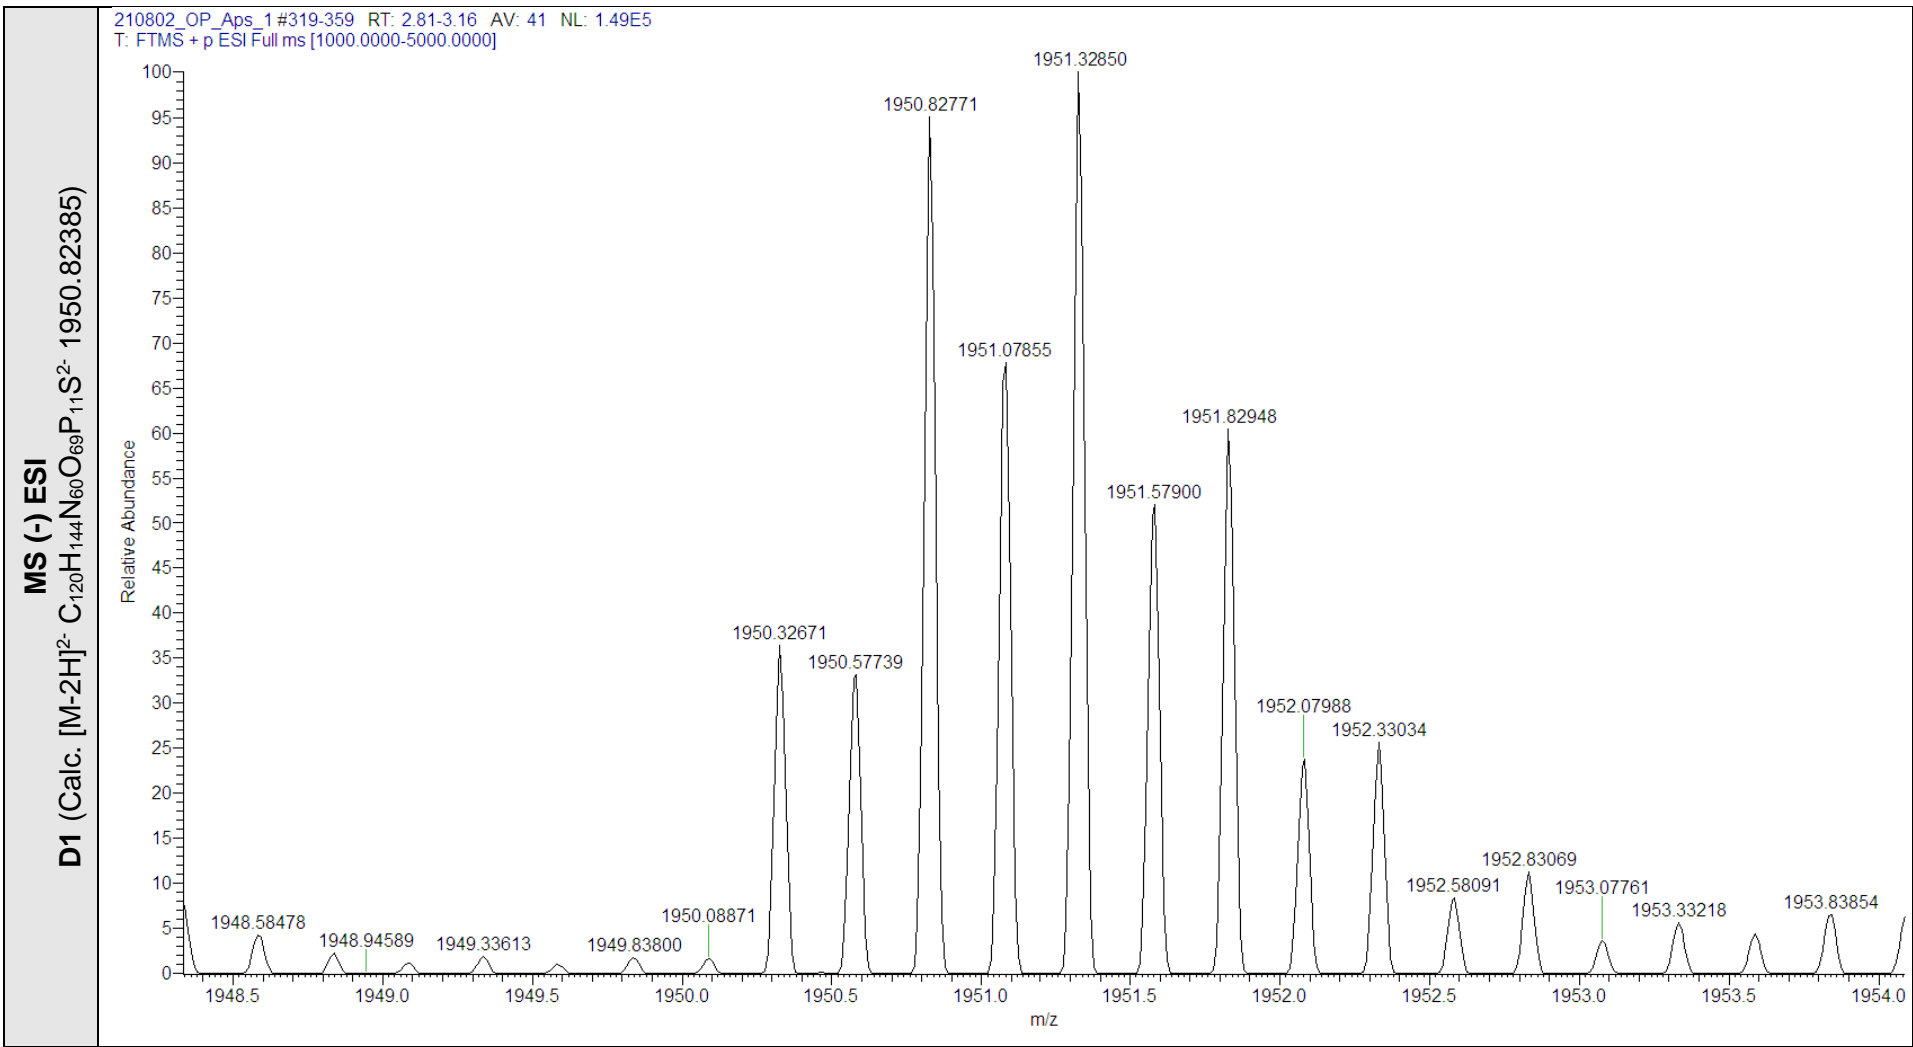



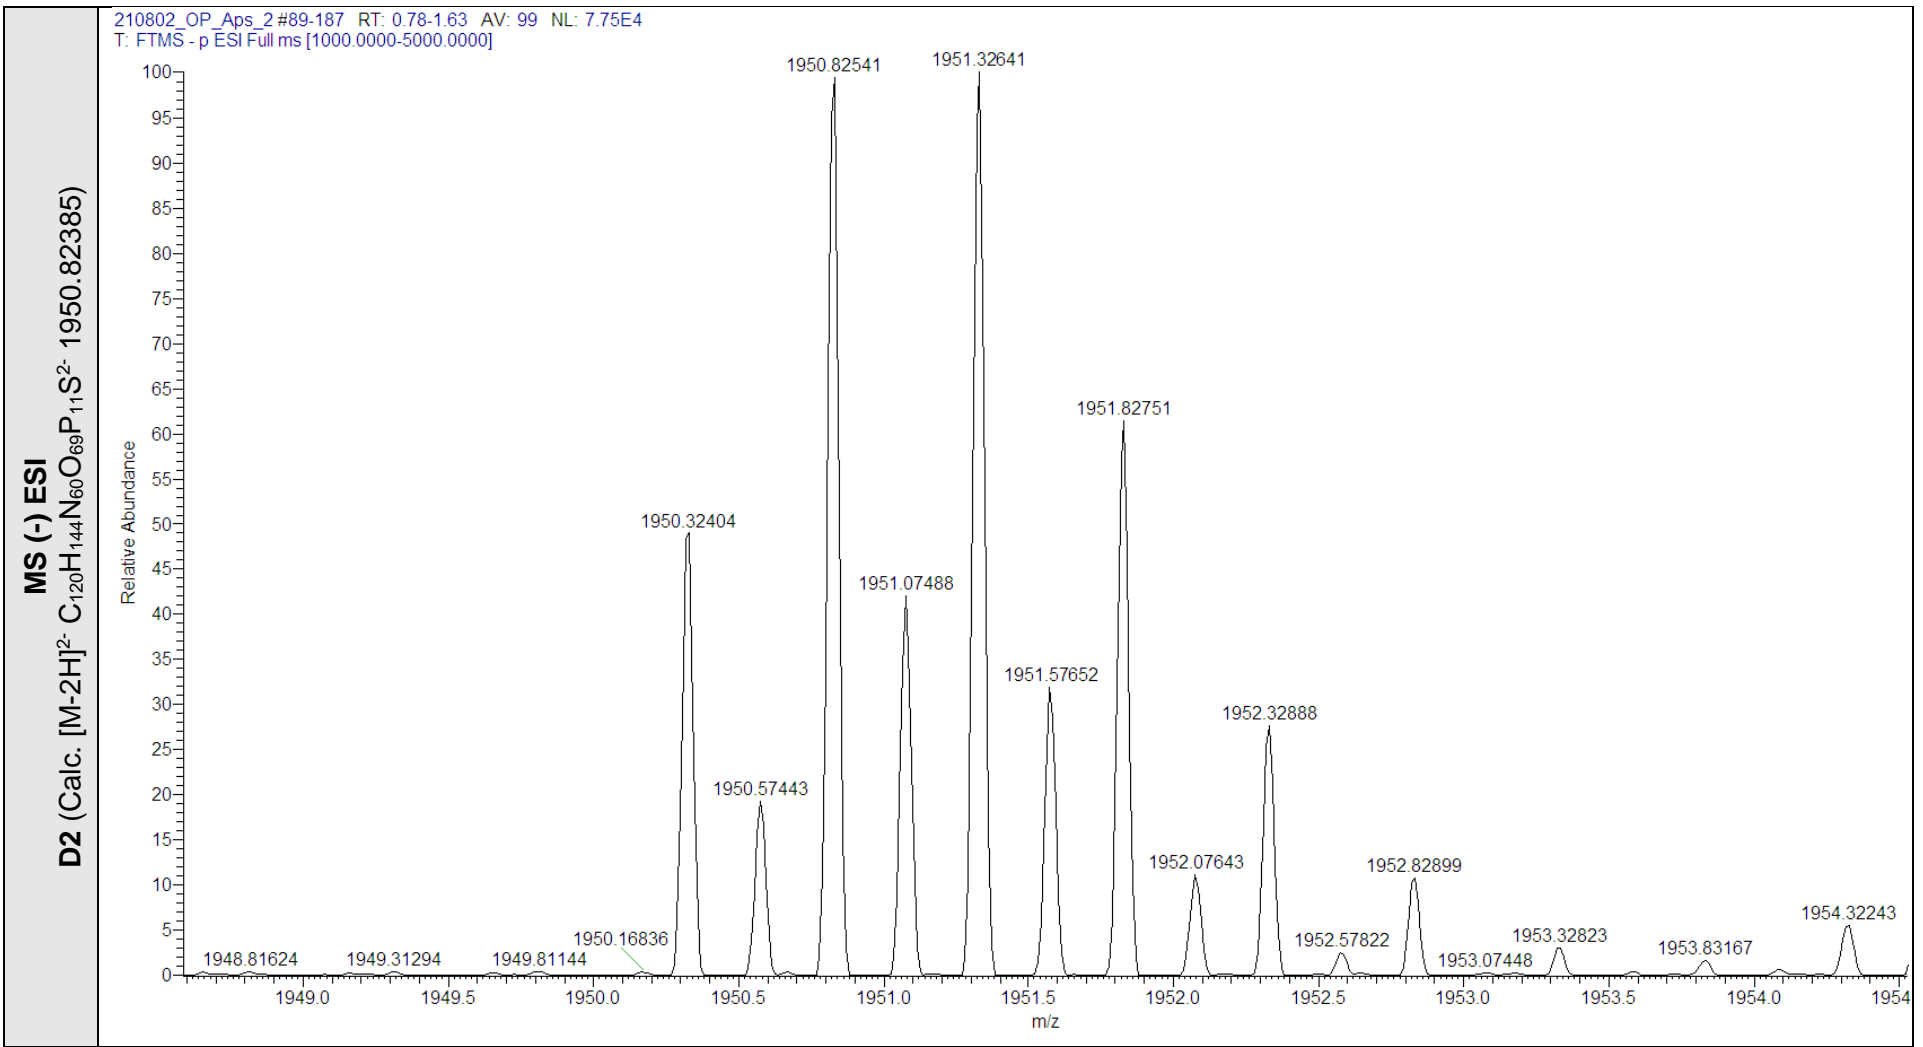

**A<sub>10</sub>Ap<sub>s</sub>A D1/D2 (Ap<sub>s</sub>3/Ap<sub>s</sub>4)**

Chemical structure

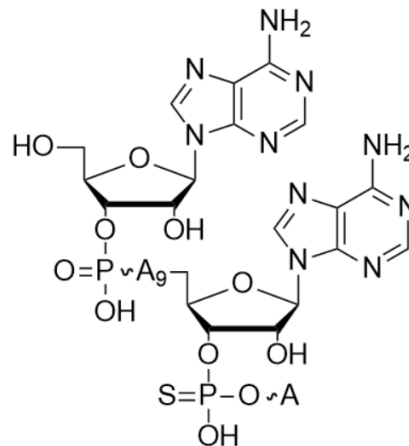

RP HPLC

**A<sub>10</sub>Ap<sub>s</sub>A D<sub>1</sub>**

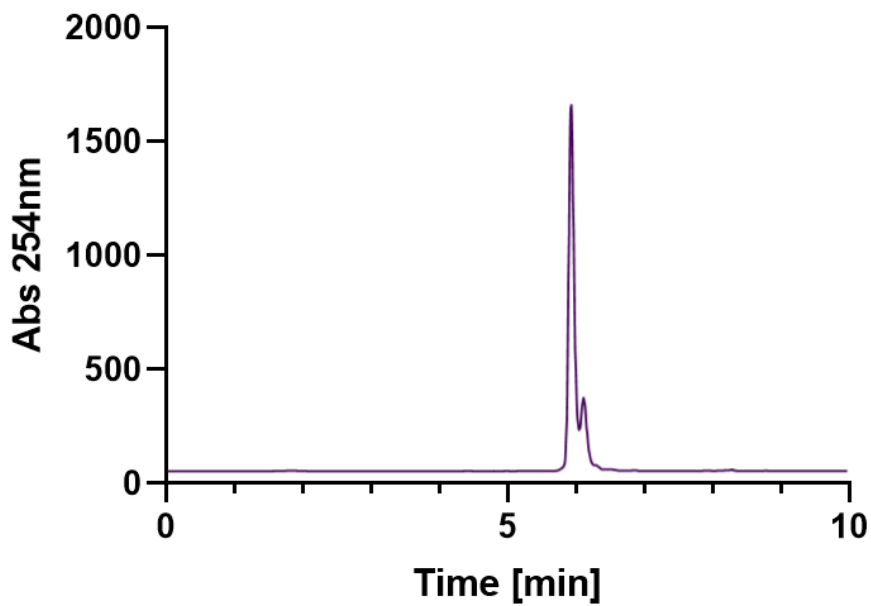

**A<sub>10</sub>Ap<sub>s</sub>A D<sub>2</sub>**

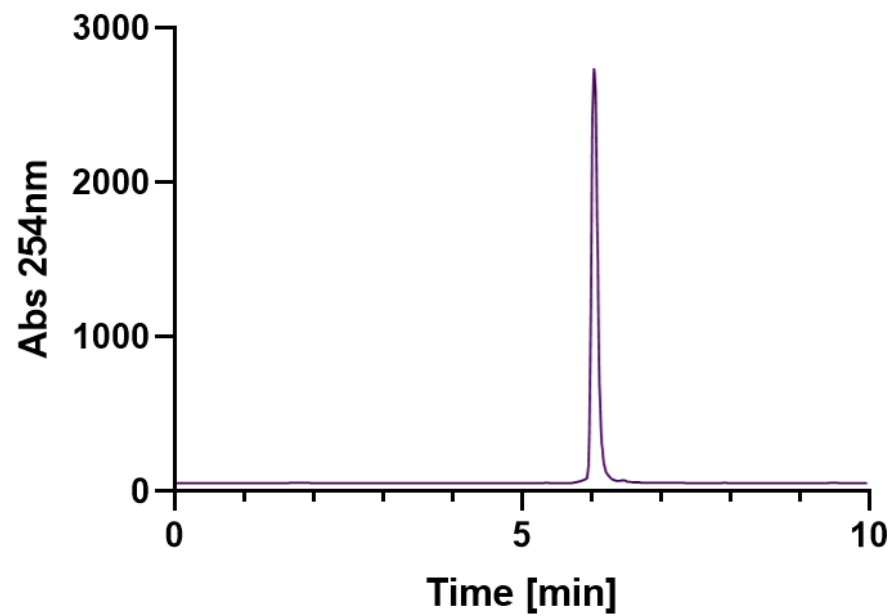

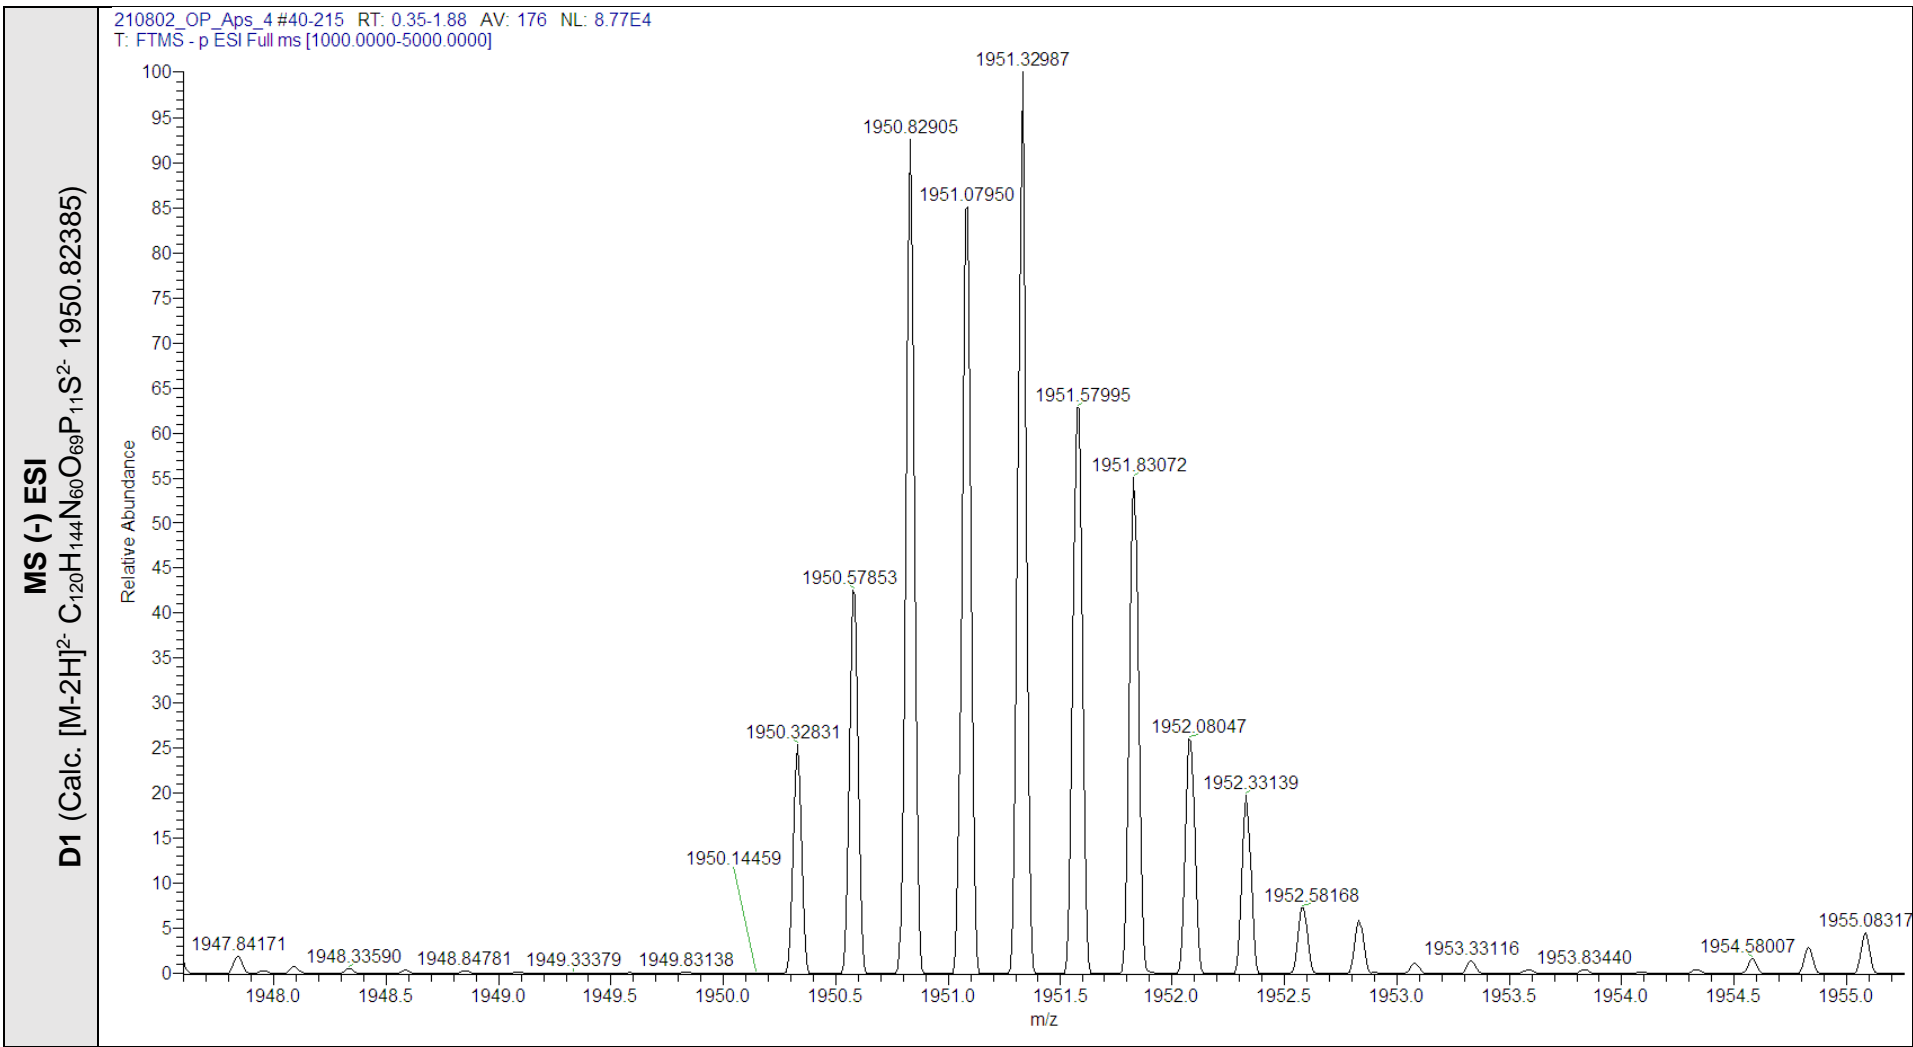

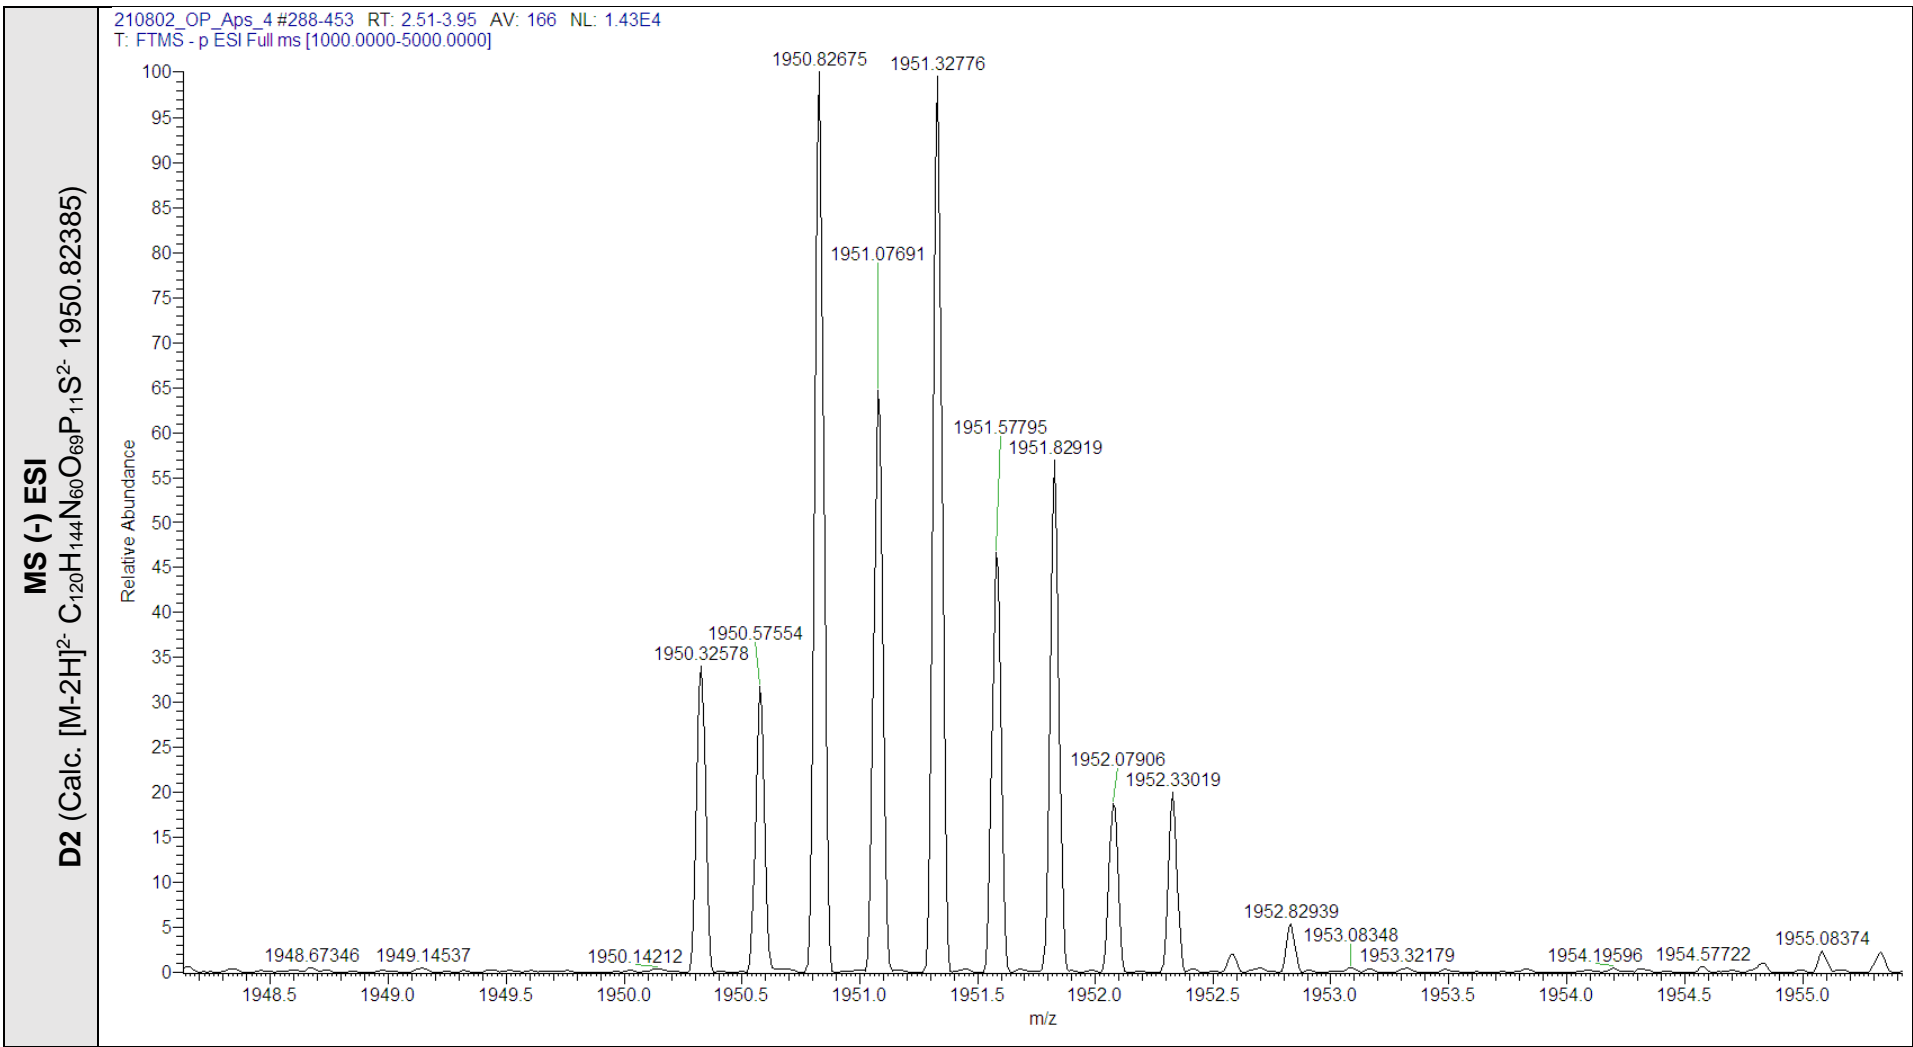

**Ap<sub>s</sub>A<sub>11</sub> D1/D2 (Ap<sub>s</sub>5/Ap<sub>s</sub>6)**

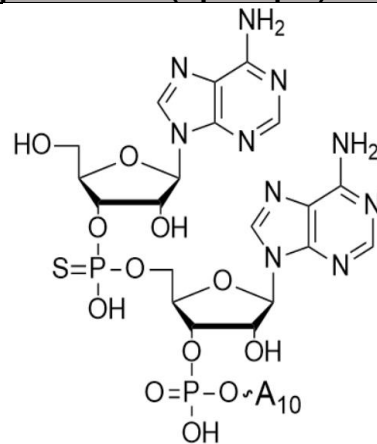

Chemical structure

RP HPLC

**Ap<sub>s</sub>A<sub>11</sub> D<sub>1</sub>**

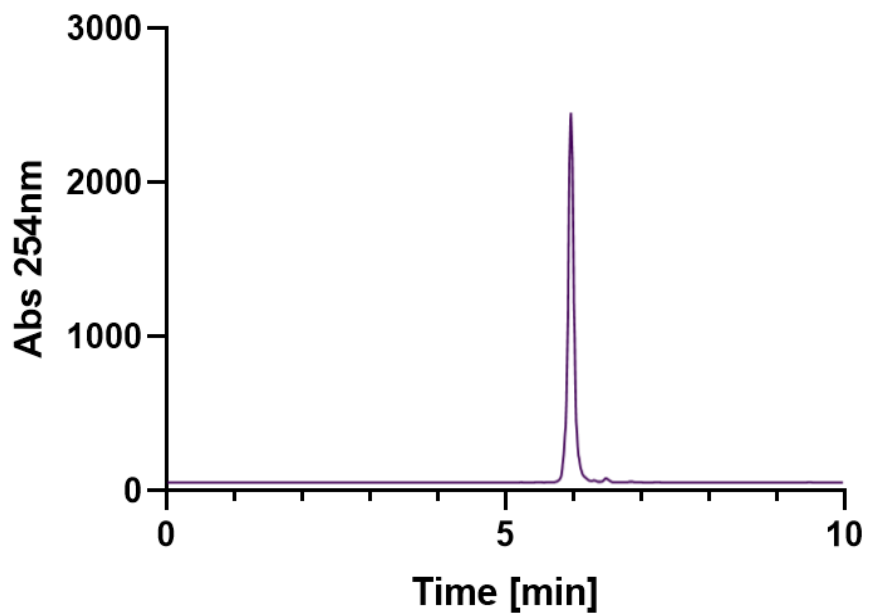

**Ap<sub>s</sub>A<sub>11</sub> D<sub>2</sub>**

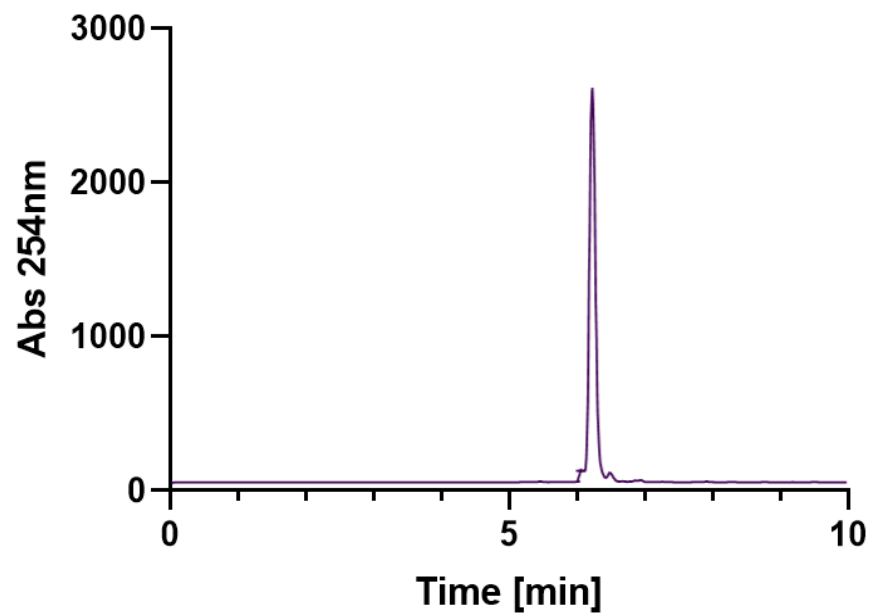

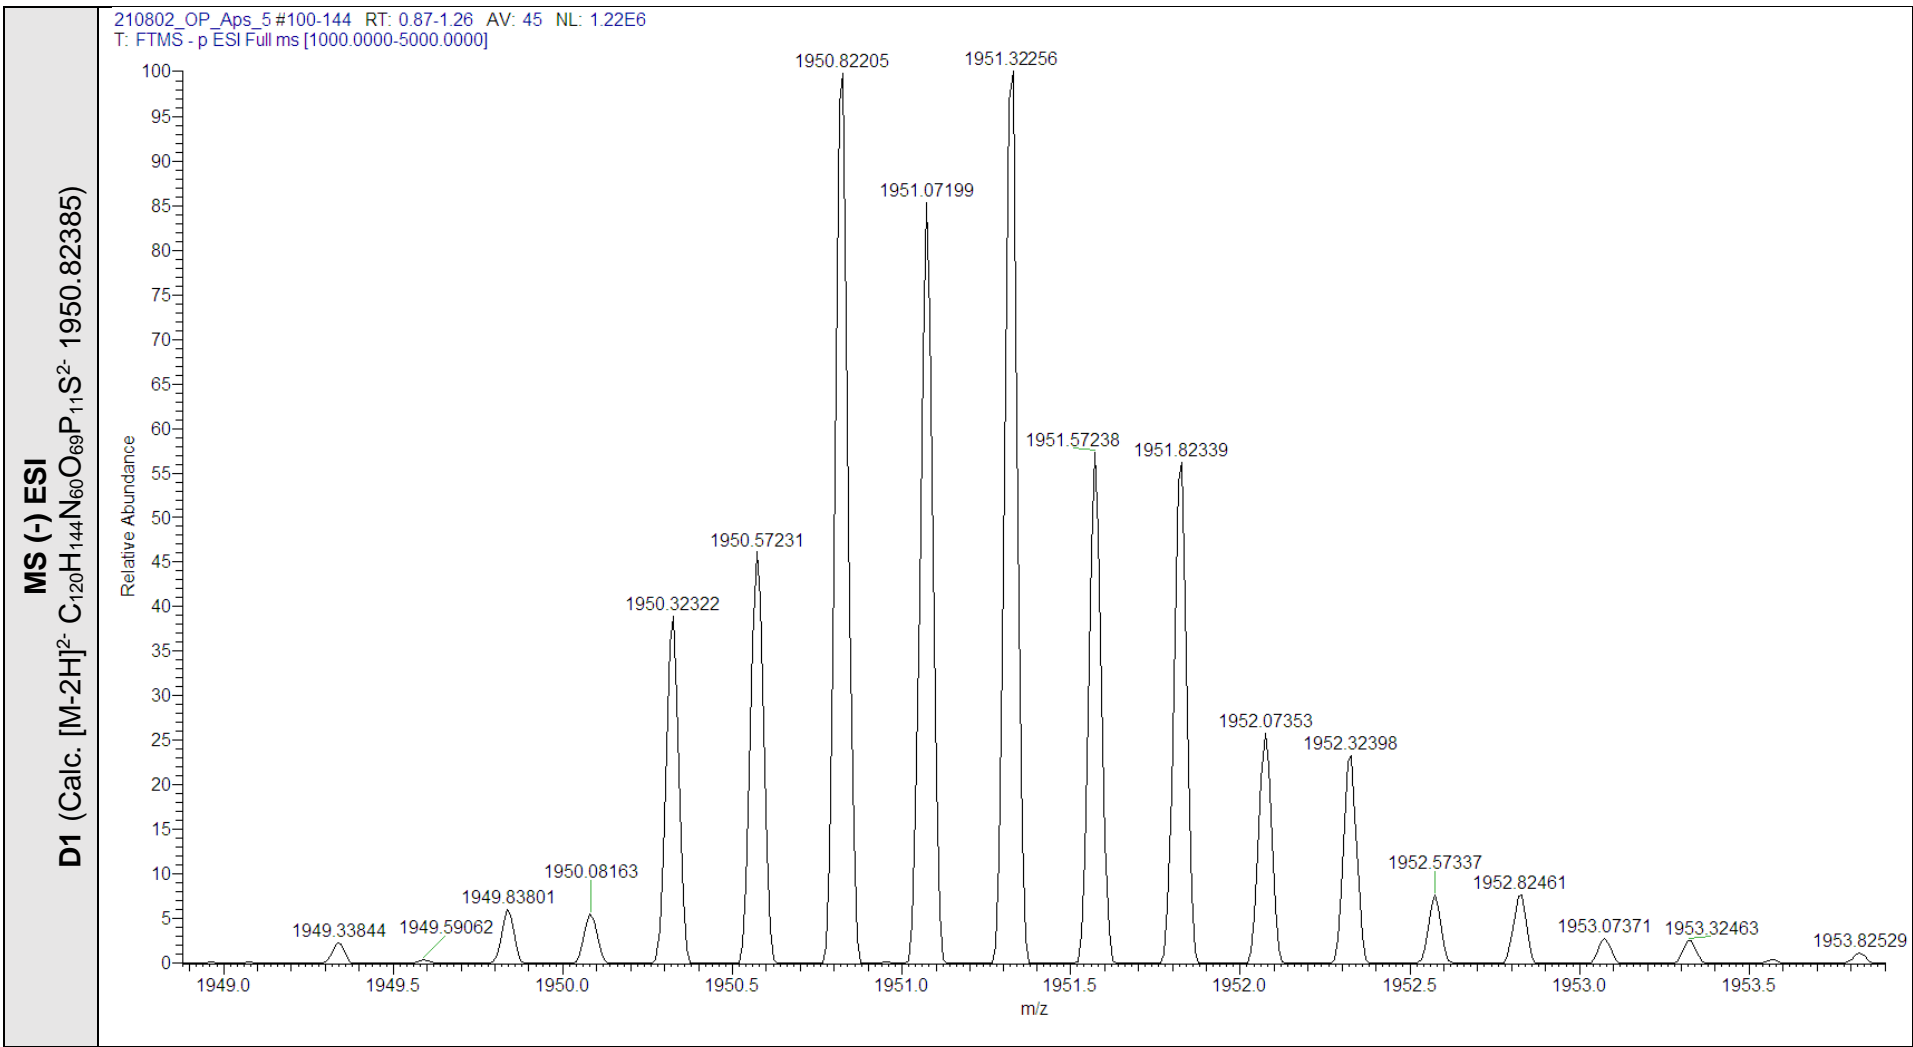

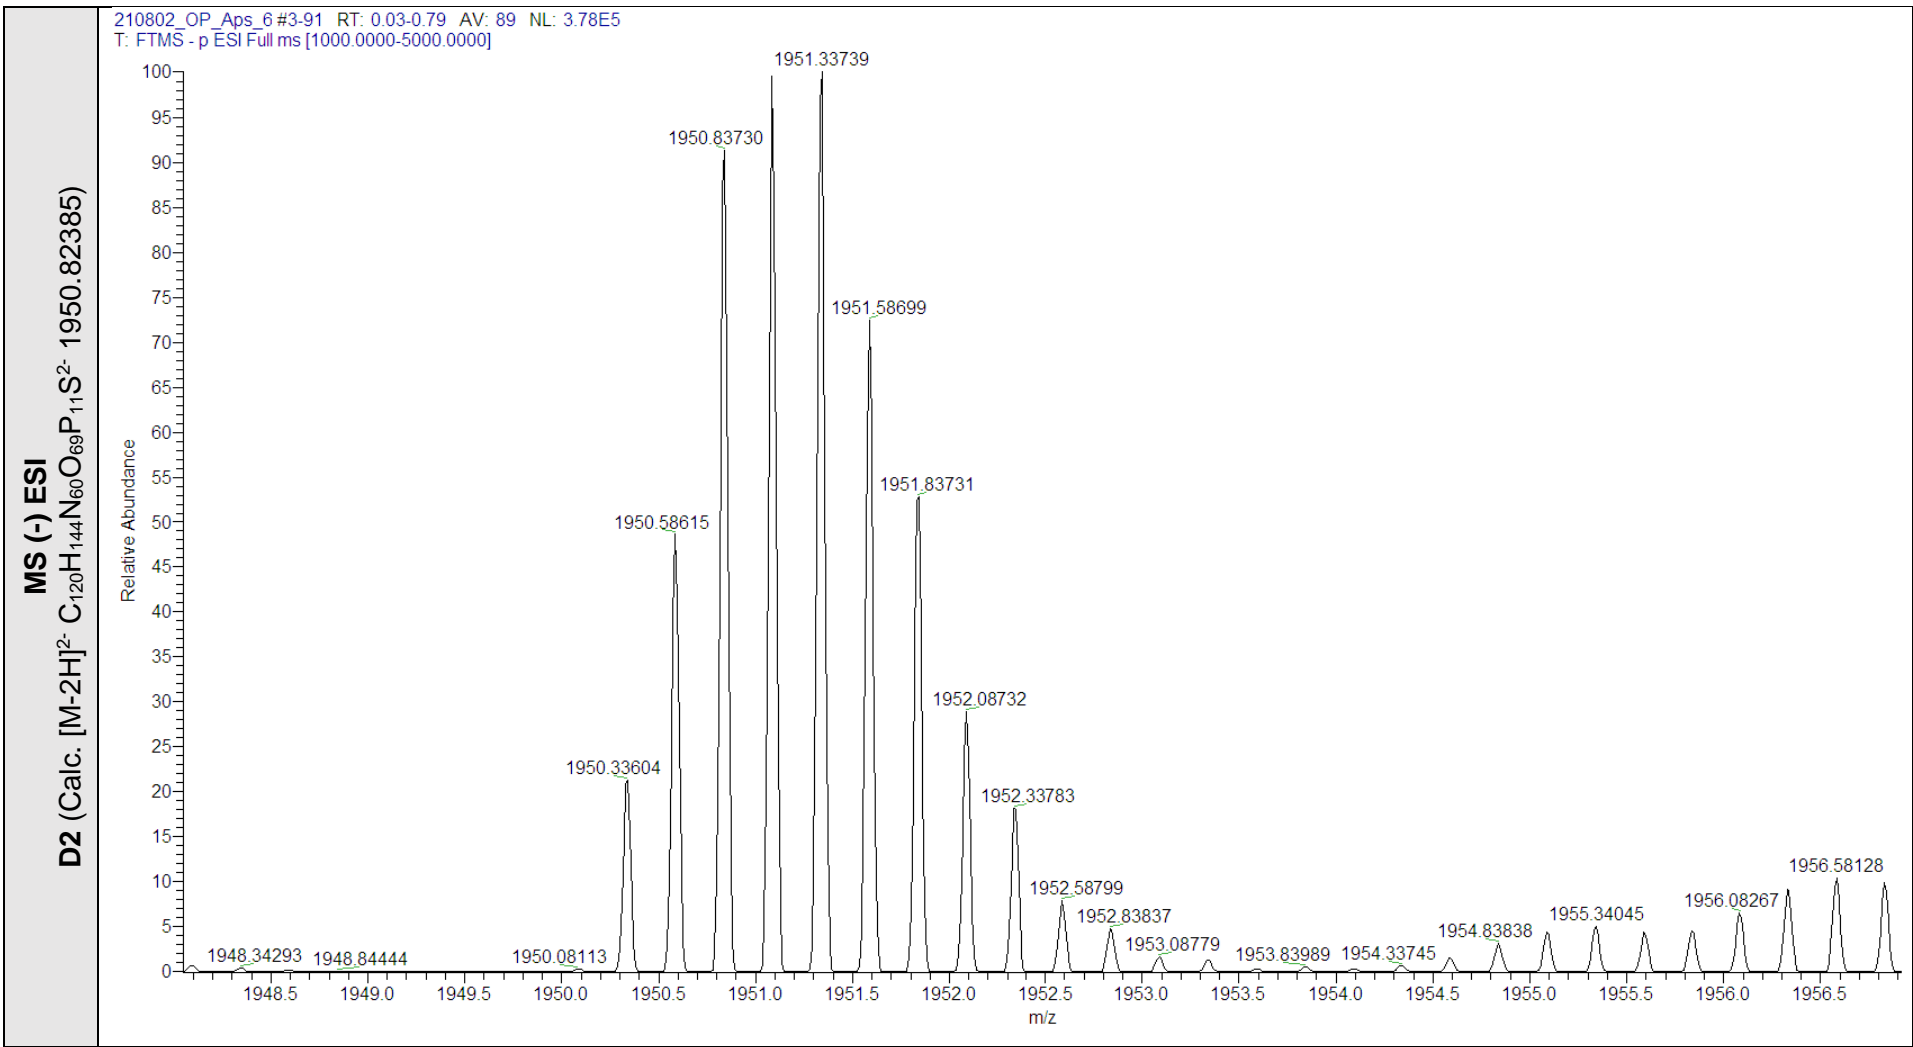

**A<sub>5</sub>p<sub>s</sub>A<sub>6</sub> D1/D2 (Ap<sub>s</sub>7/Ap<sub>s</sub>8)**

Chemical structure

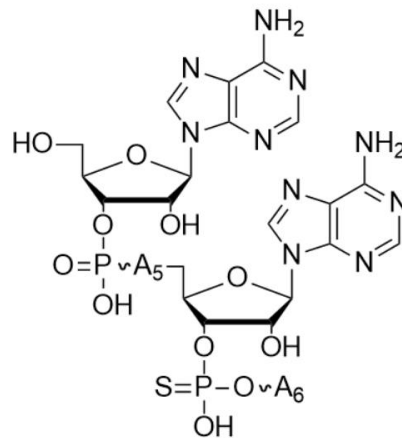

RP HPLC

**A<sub>5</sub>Ap<sub>s</sub>A<sub>6</sub> D<sub>1</sub>**

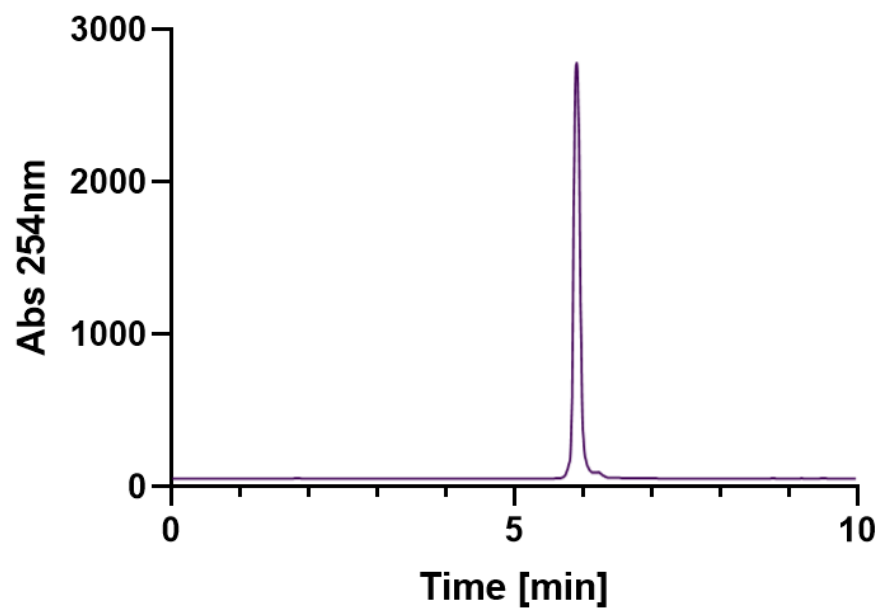

**A<sub>5</sub>Ap<sub>s</sub>A<sub>6</sub> D<sub>2</sub>**

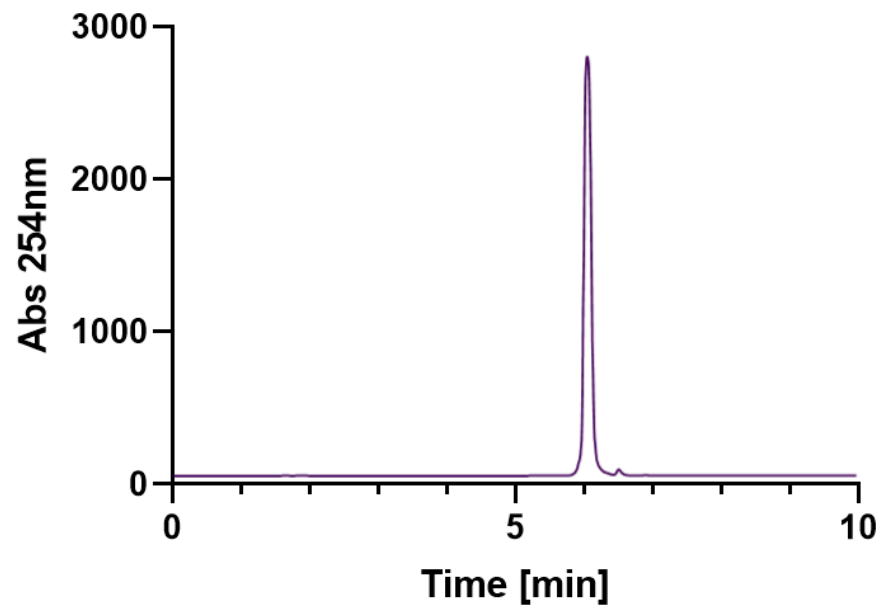



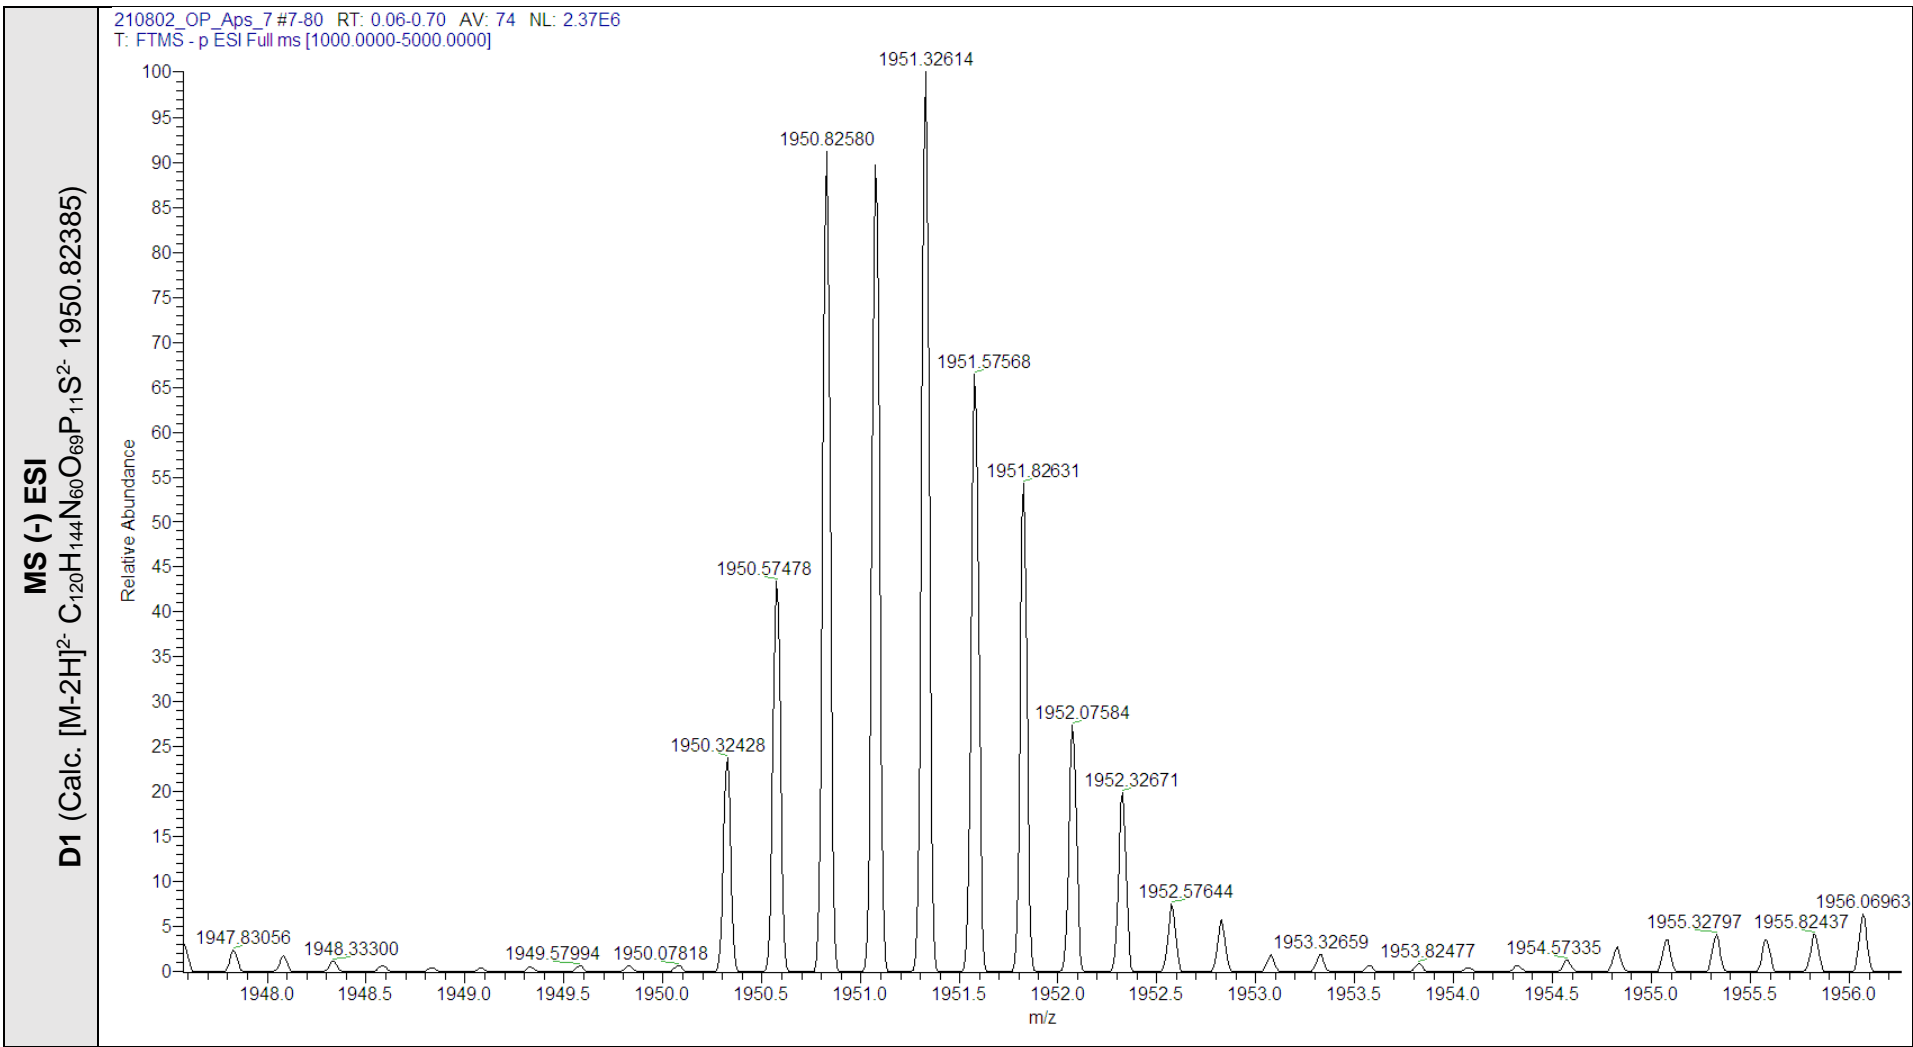

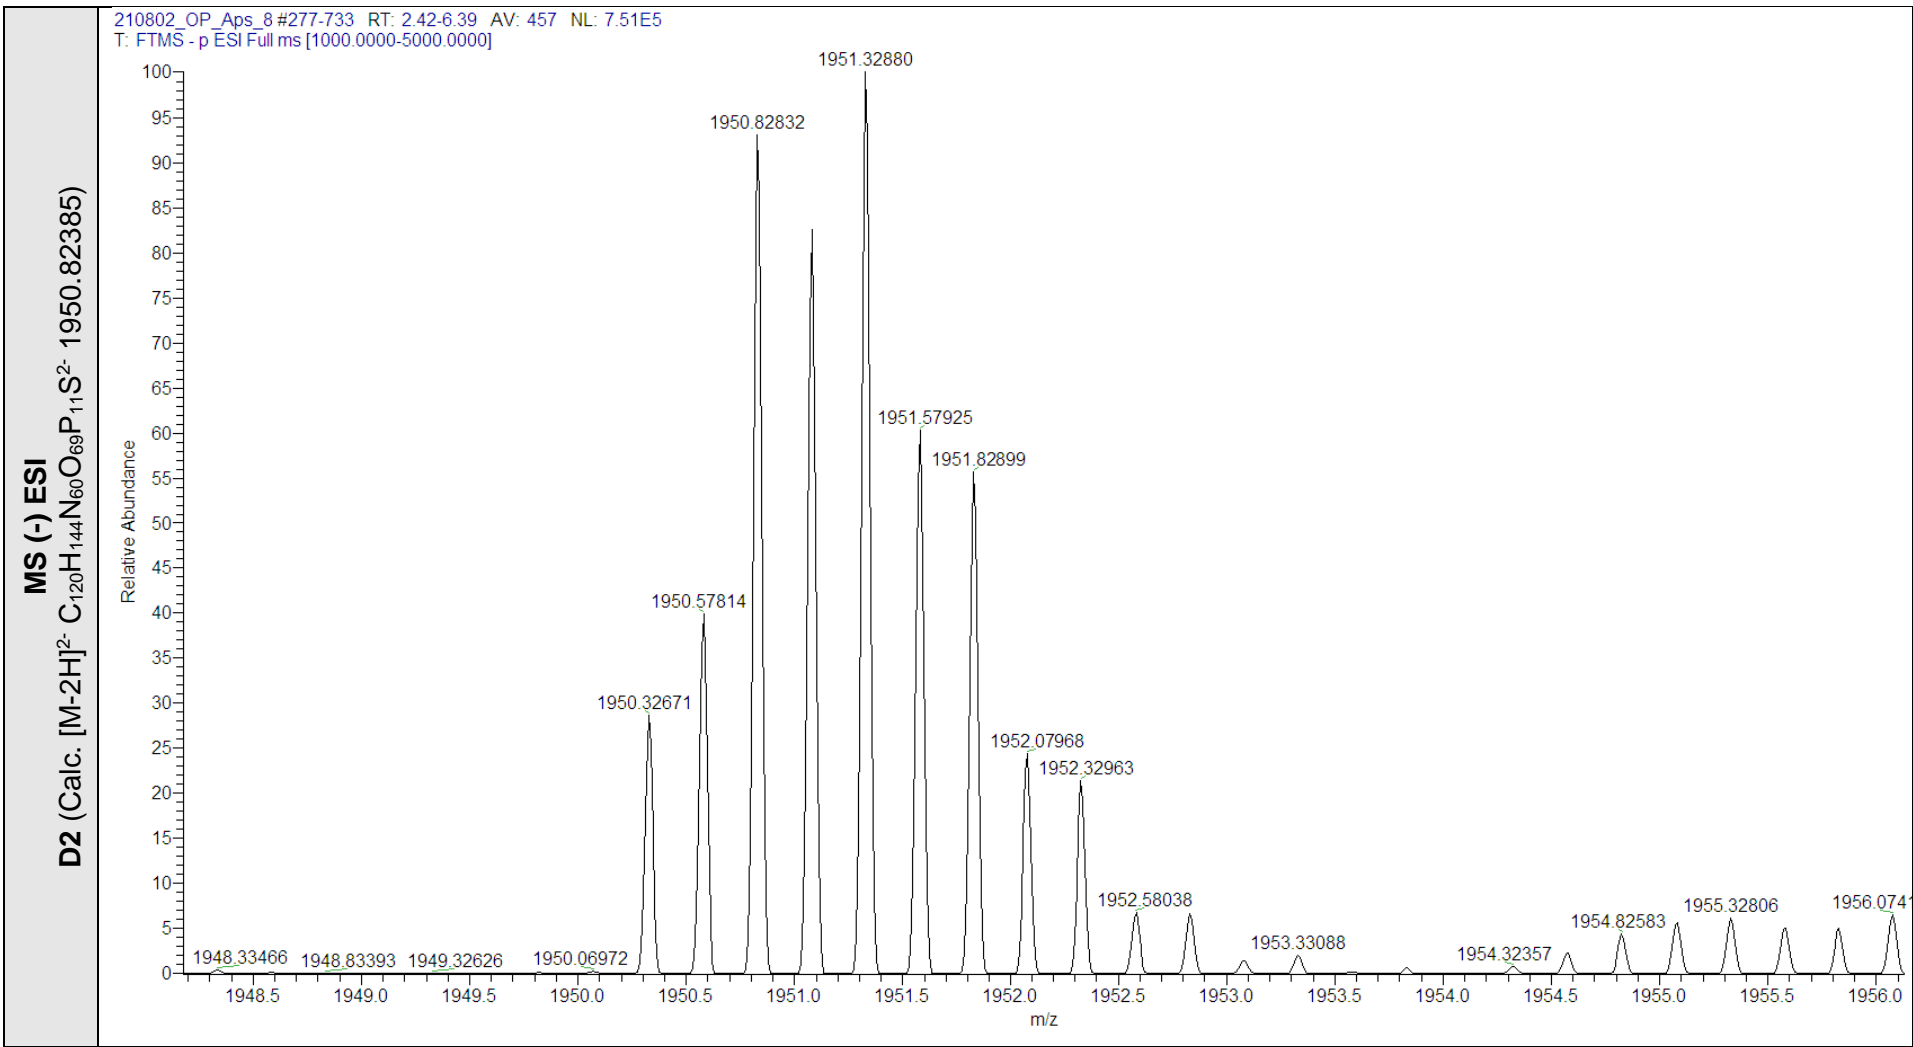

**Ap<sub>s11</sub>A (Ap<sub>s9</sub>)**

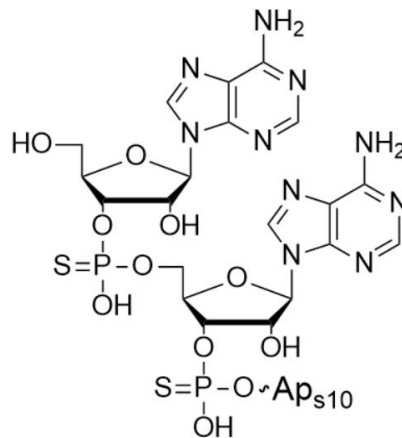

**Ap<sub>s11</sub>A**

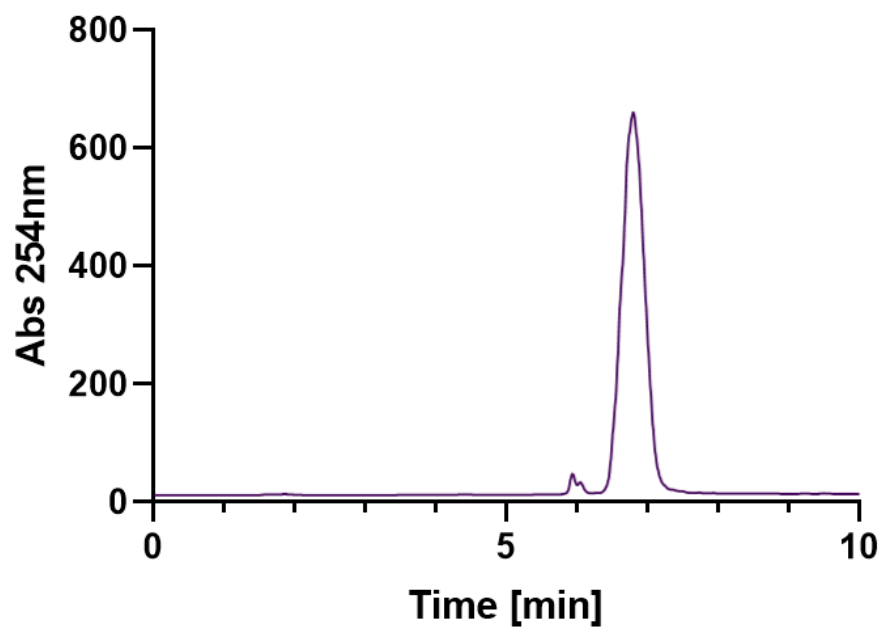

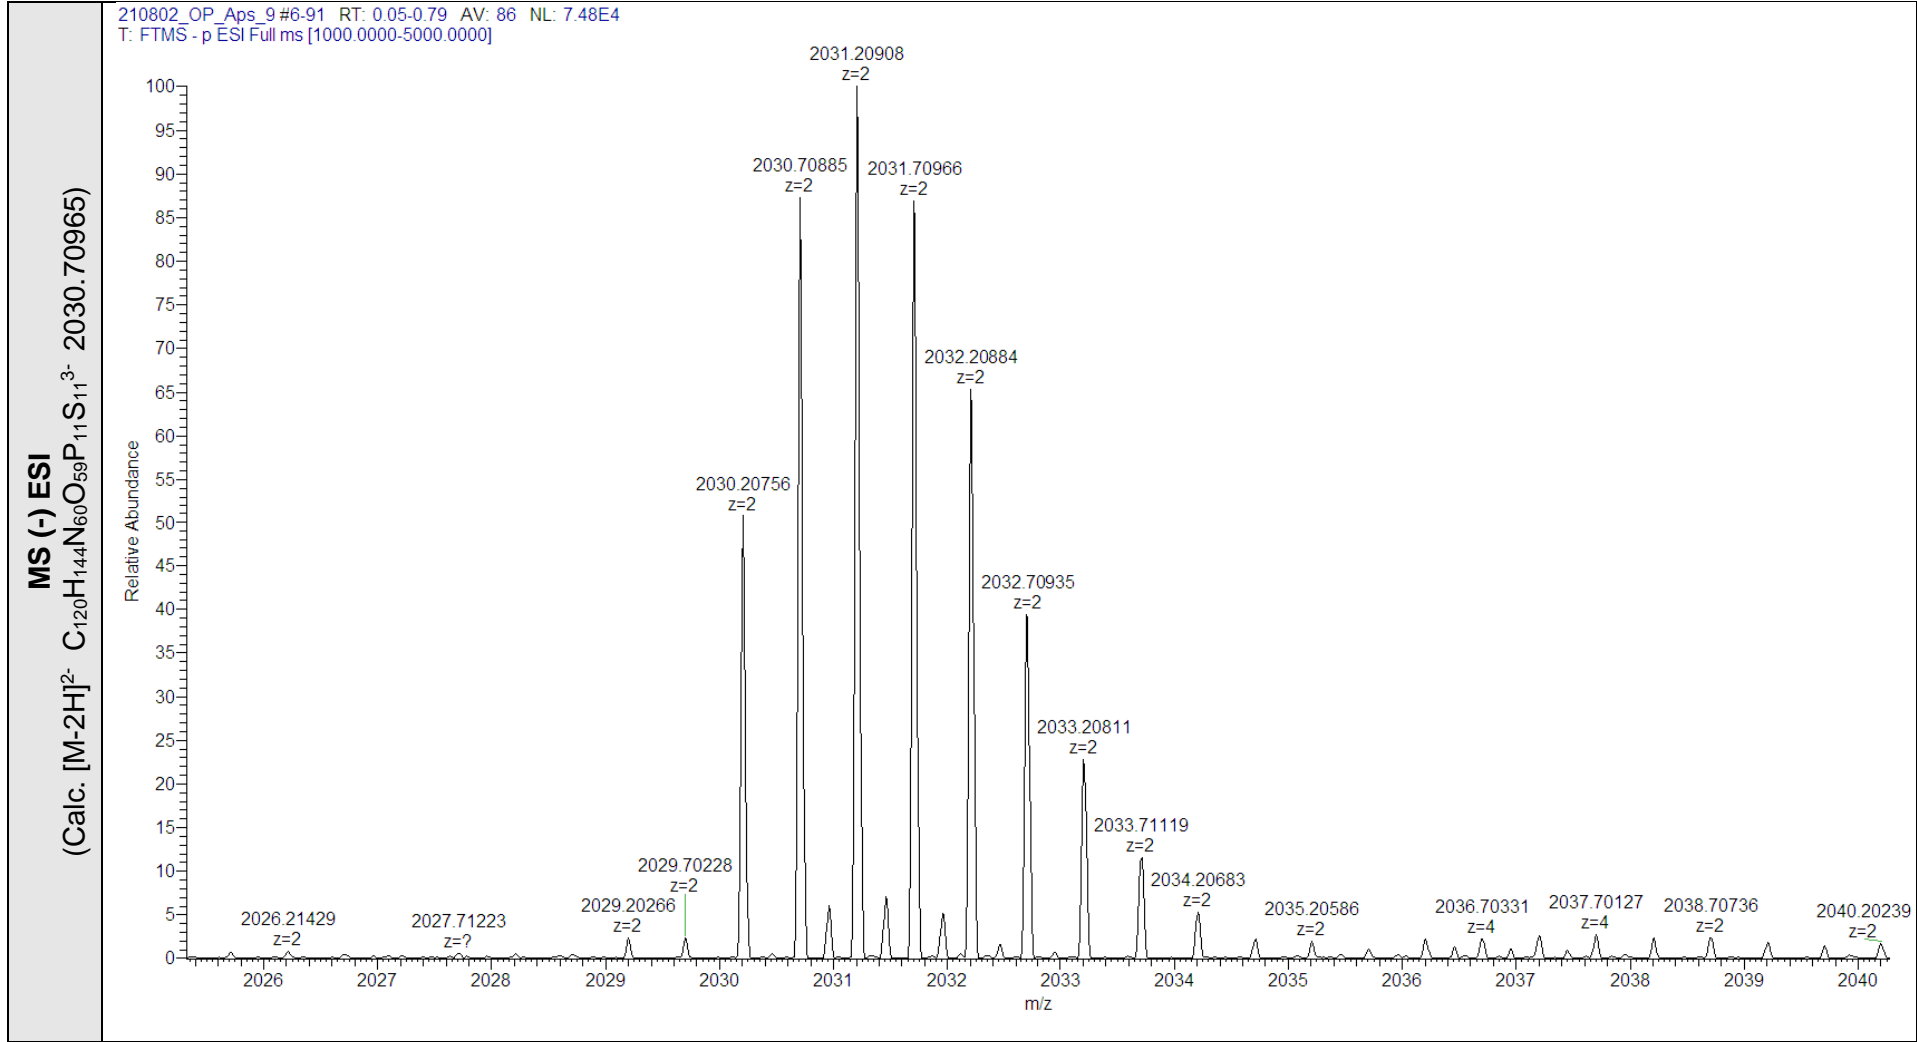

**Ap<sub>S</sub>A<sub>9</sub>Ap<sub>S</sub>A (Ap<sub>S</sub>10)**

Chemical structure

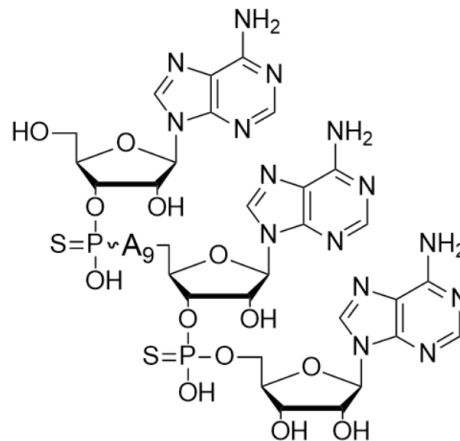

RP HPLC

**Ap<sub>S</sub>A<sub>9</sub>Ap<sub>S</sub>A**

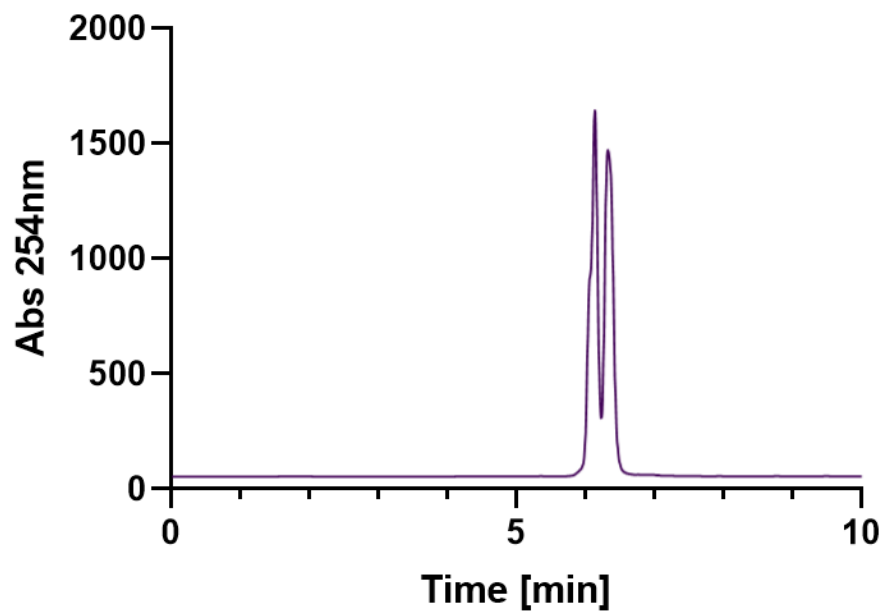

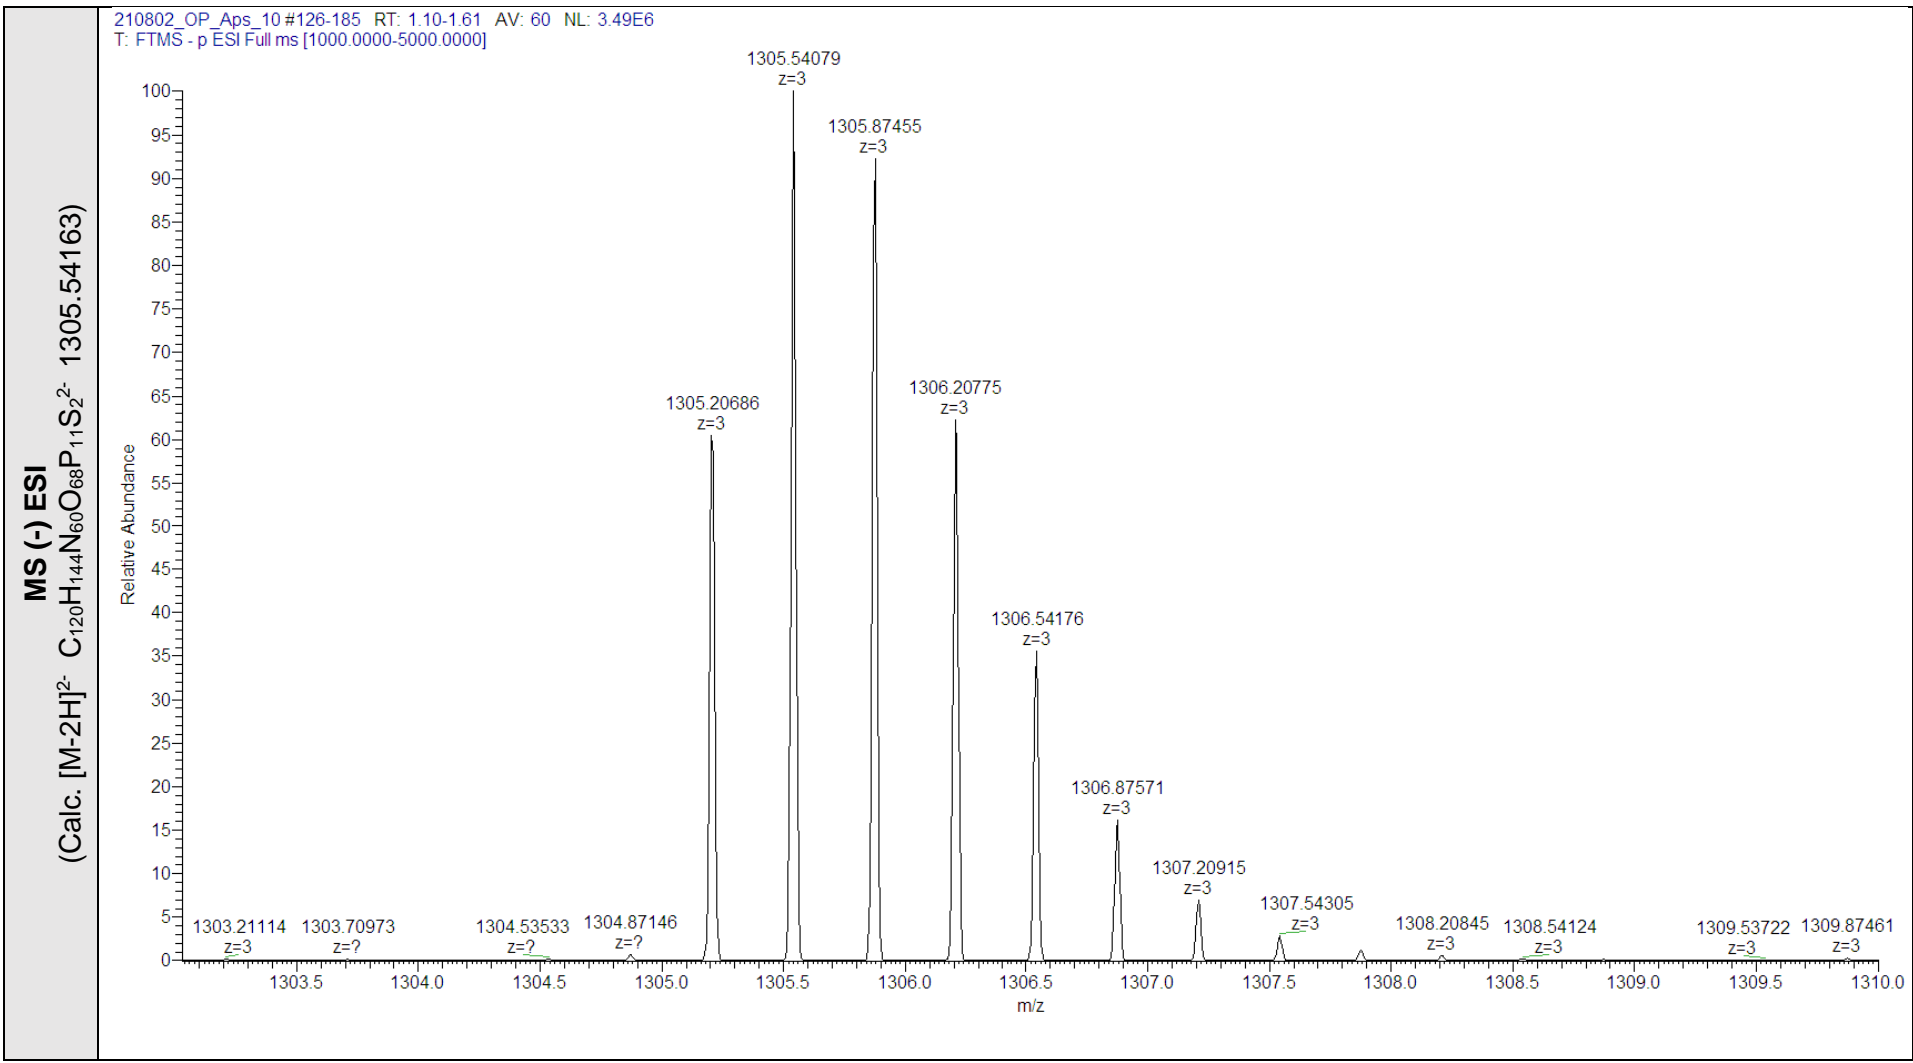

**A<sub>10</sub>A<sub>m</sub>A (A<sub>m</sub>1)**

Chemical structure

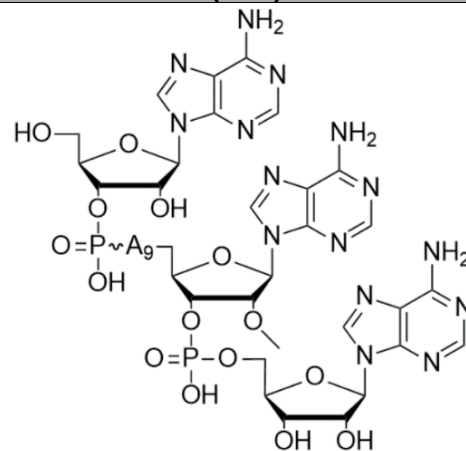

RP HPLC

**A<sub>10</sub>A<sub>m</sub>A**

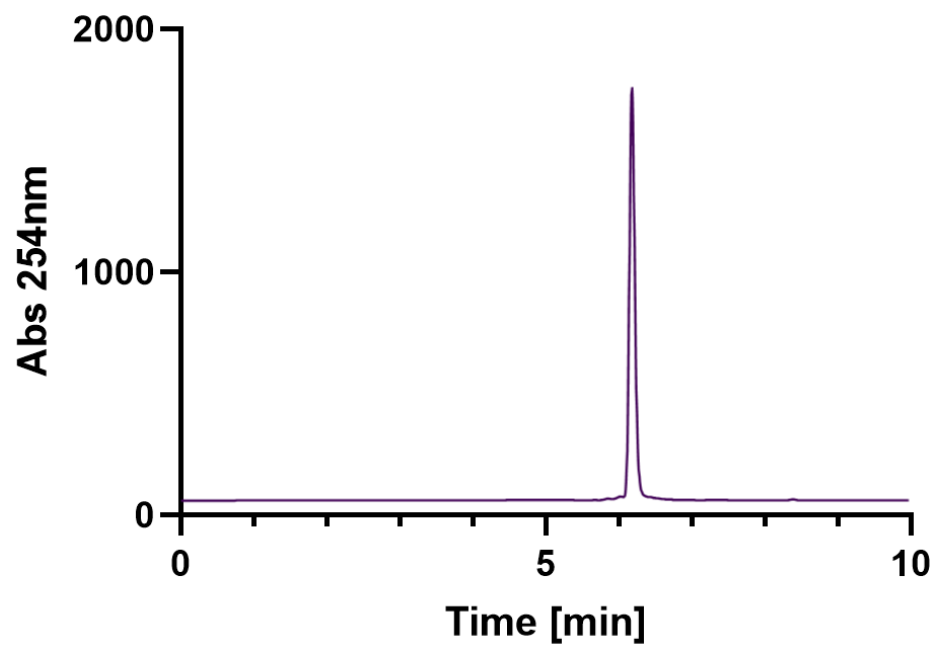

**MS (-) ESI**  
**(Calc. [M-2H]<sup>2-</sup> C<sub>12</sub>H<sub>146</sub>N<sub>60</sub>O<sub>70</sub>P<sub>11</sub><sup>2-</sup> 1949.8431)**

210802\_OP\_Am\_1#119-180 RT: 1.04-1.57 AV: 62 NL: 1.04E6  
T: FTMS - p ESI Full ms [1000.0000-5000.0000]

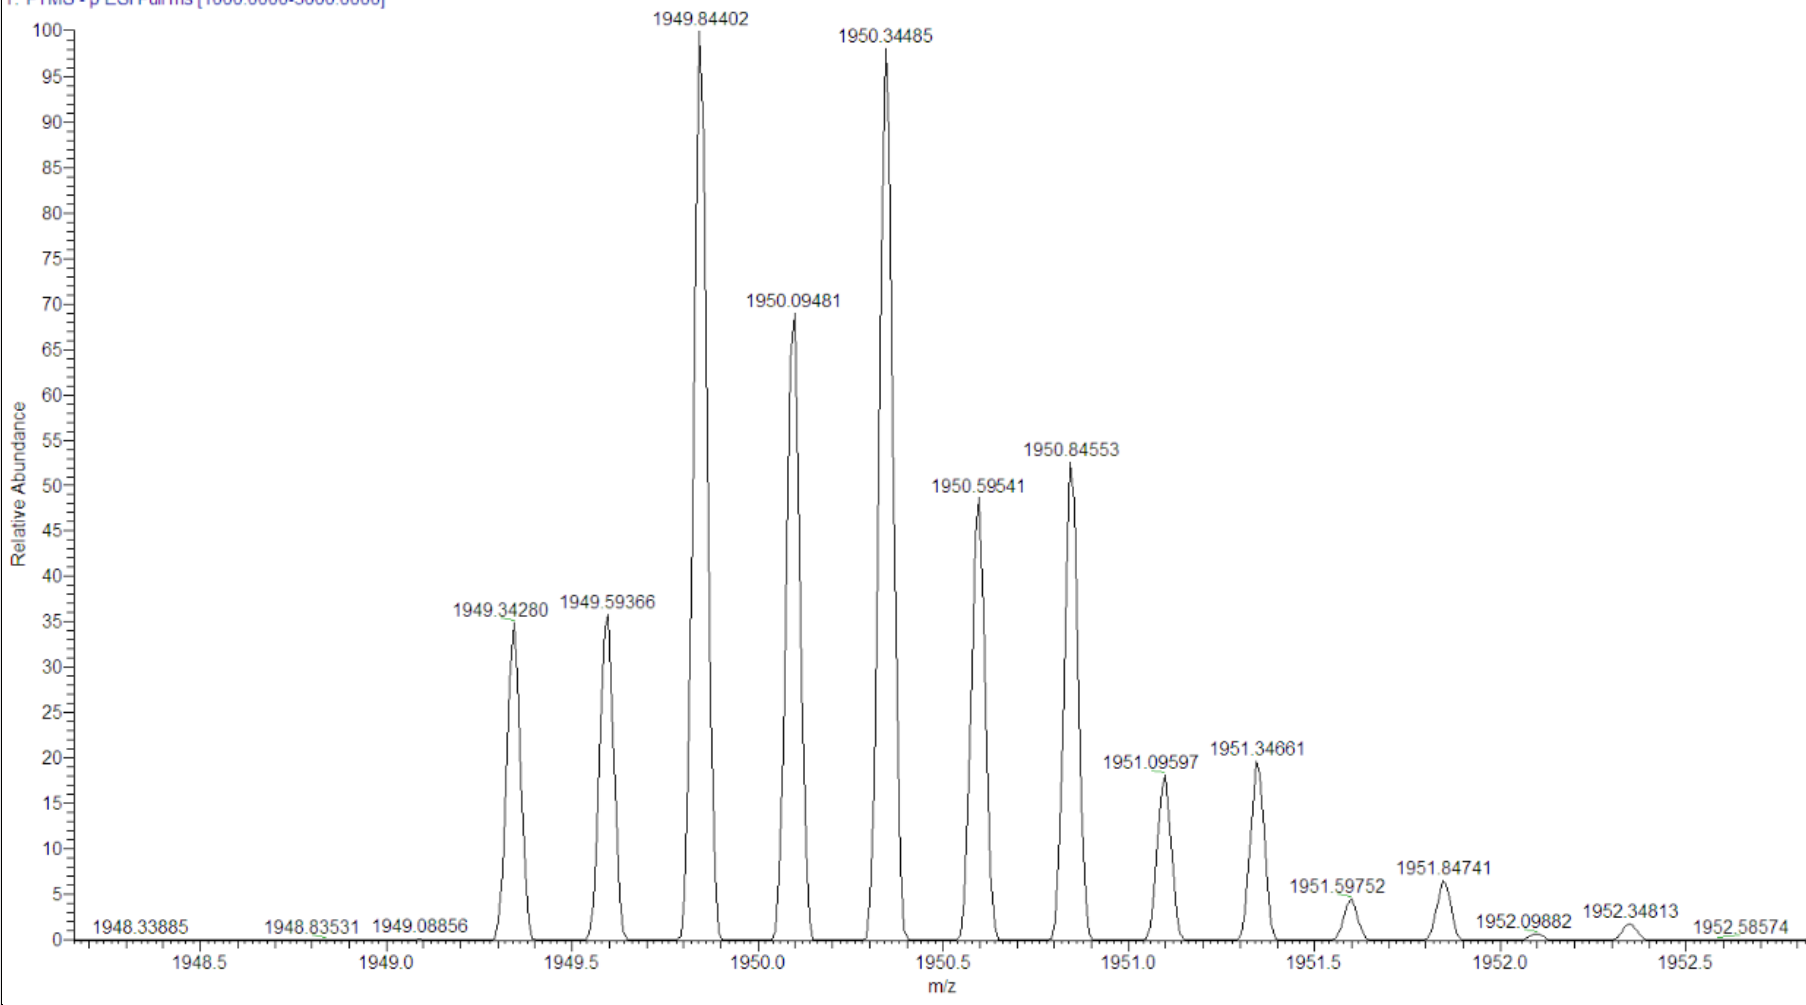



**A<sub>5</sub>A<sub>m</sub>A<sub>6</sub> (A<sub>m</sub>2)**

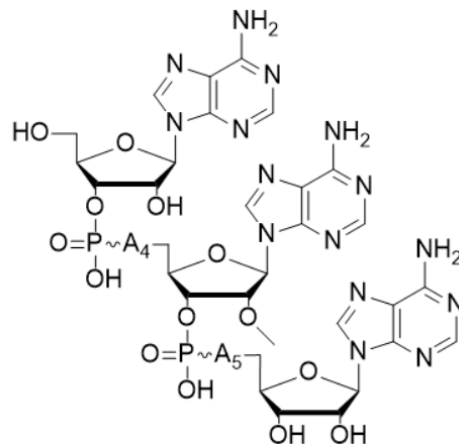

Chemical structure

RP HPLC

**A<sub>5</sub>A<sub>m</sub>A<sub>6</sub>**

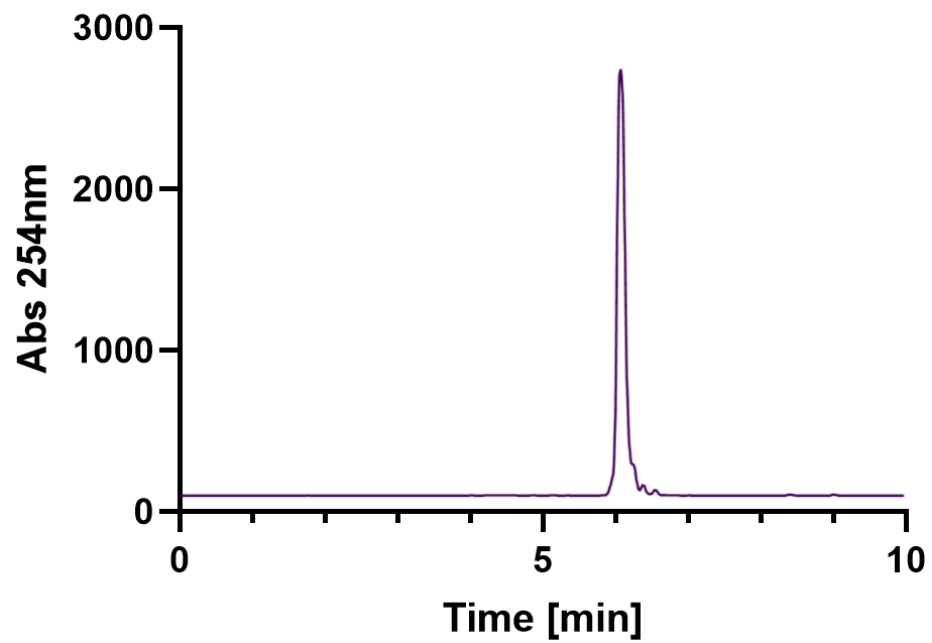

**MS (-) ESI**  
**(Calc. [M-2H]<sup>2-</sup> C<sub>121</sub>H<sub>146</sub>N<sub>60</sub>O<sub>70</sub>P<sub>11</sub><sup>2-</sup> 1949.8431)**

210802\_OP\_Am\_3#116-187 RT: 1.01-1.63 AV: 72 NL: 5.82E5  
T: FTMS - p ESI Full ms [1000.0000-5000.0000]

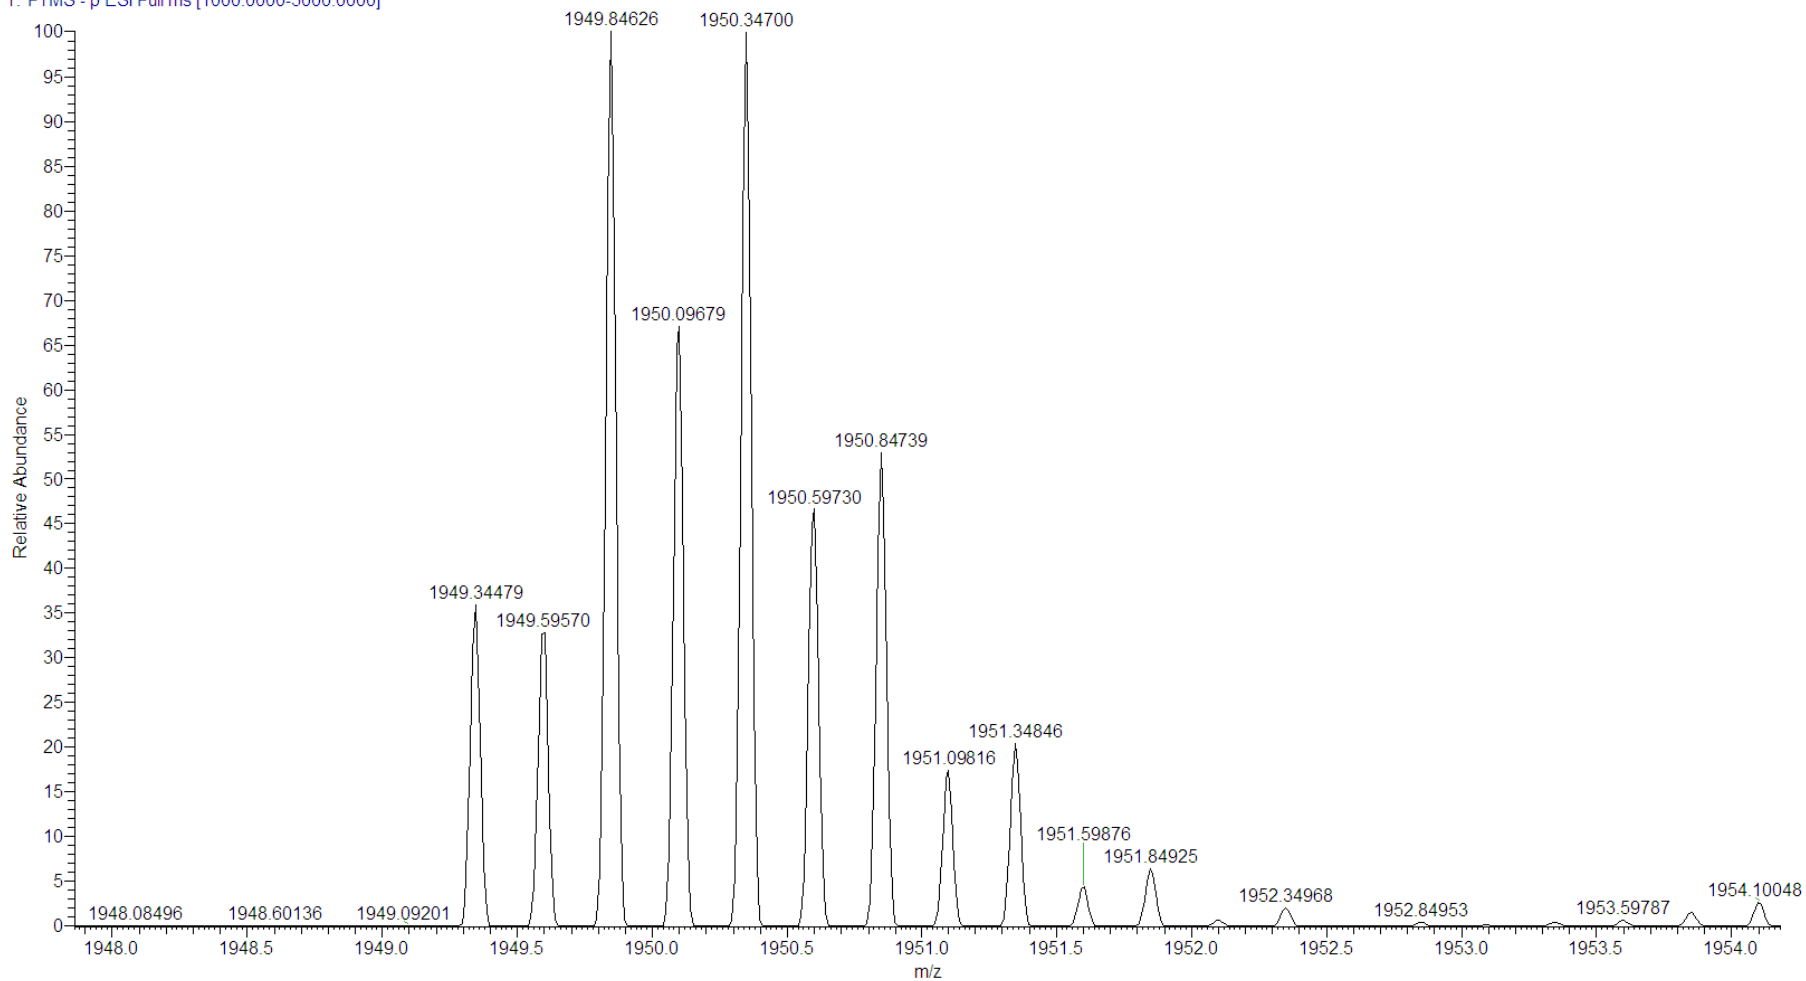

**A<sub>m</sub>A<sub>11</sub> (A<sub>m</sub>3)**

Chemical structure

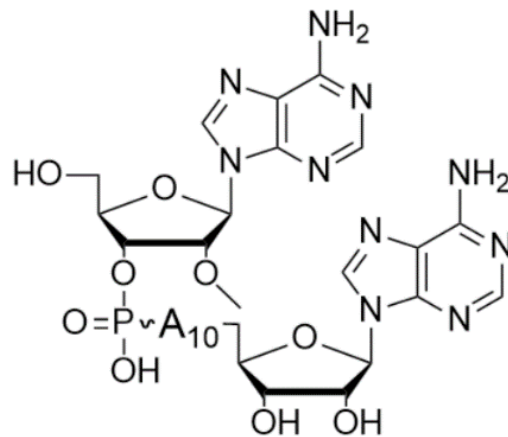

RP HPLC

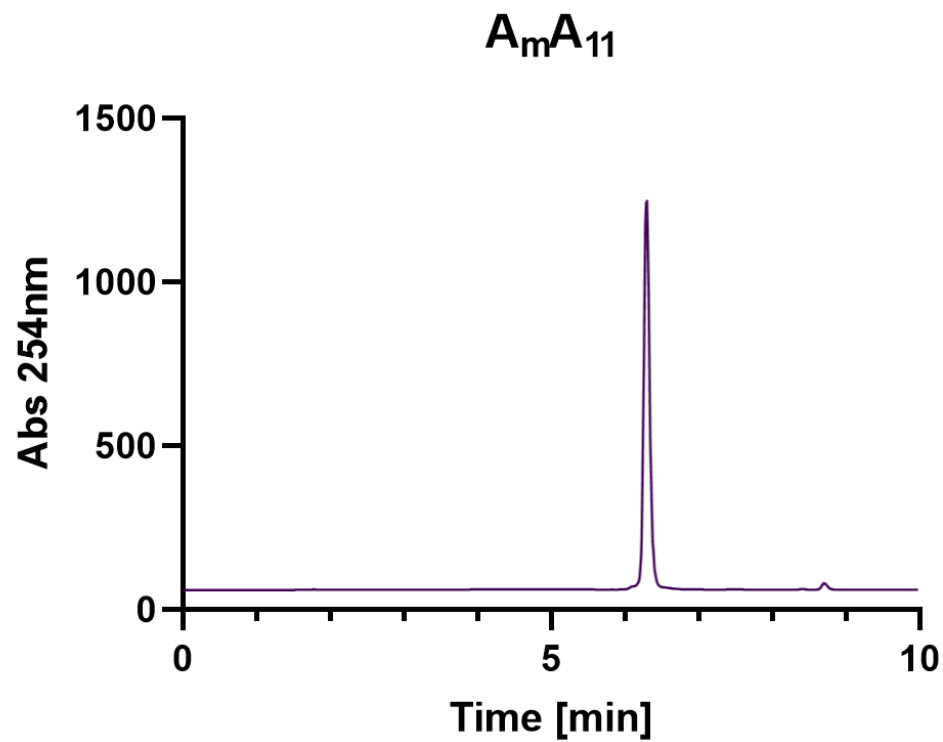

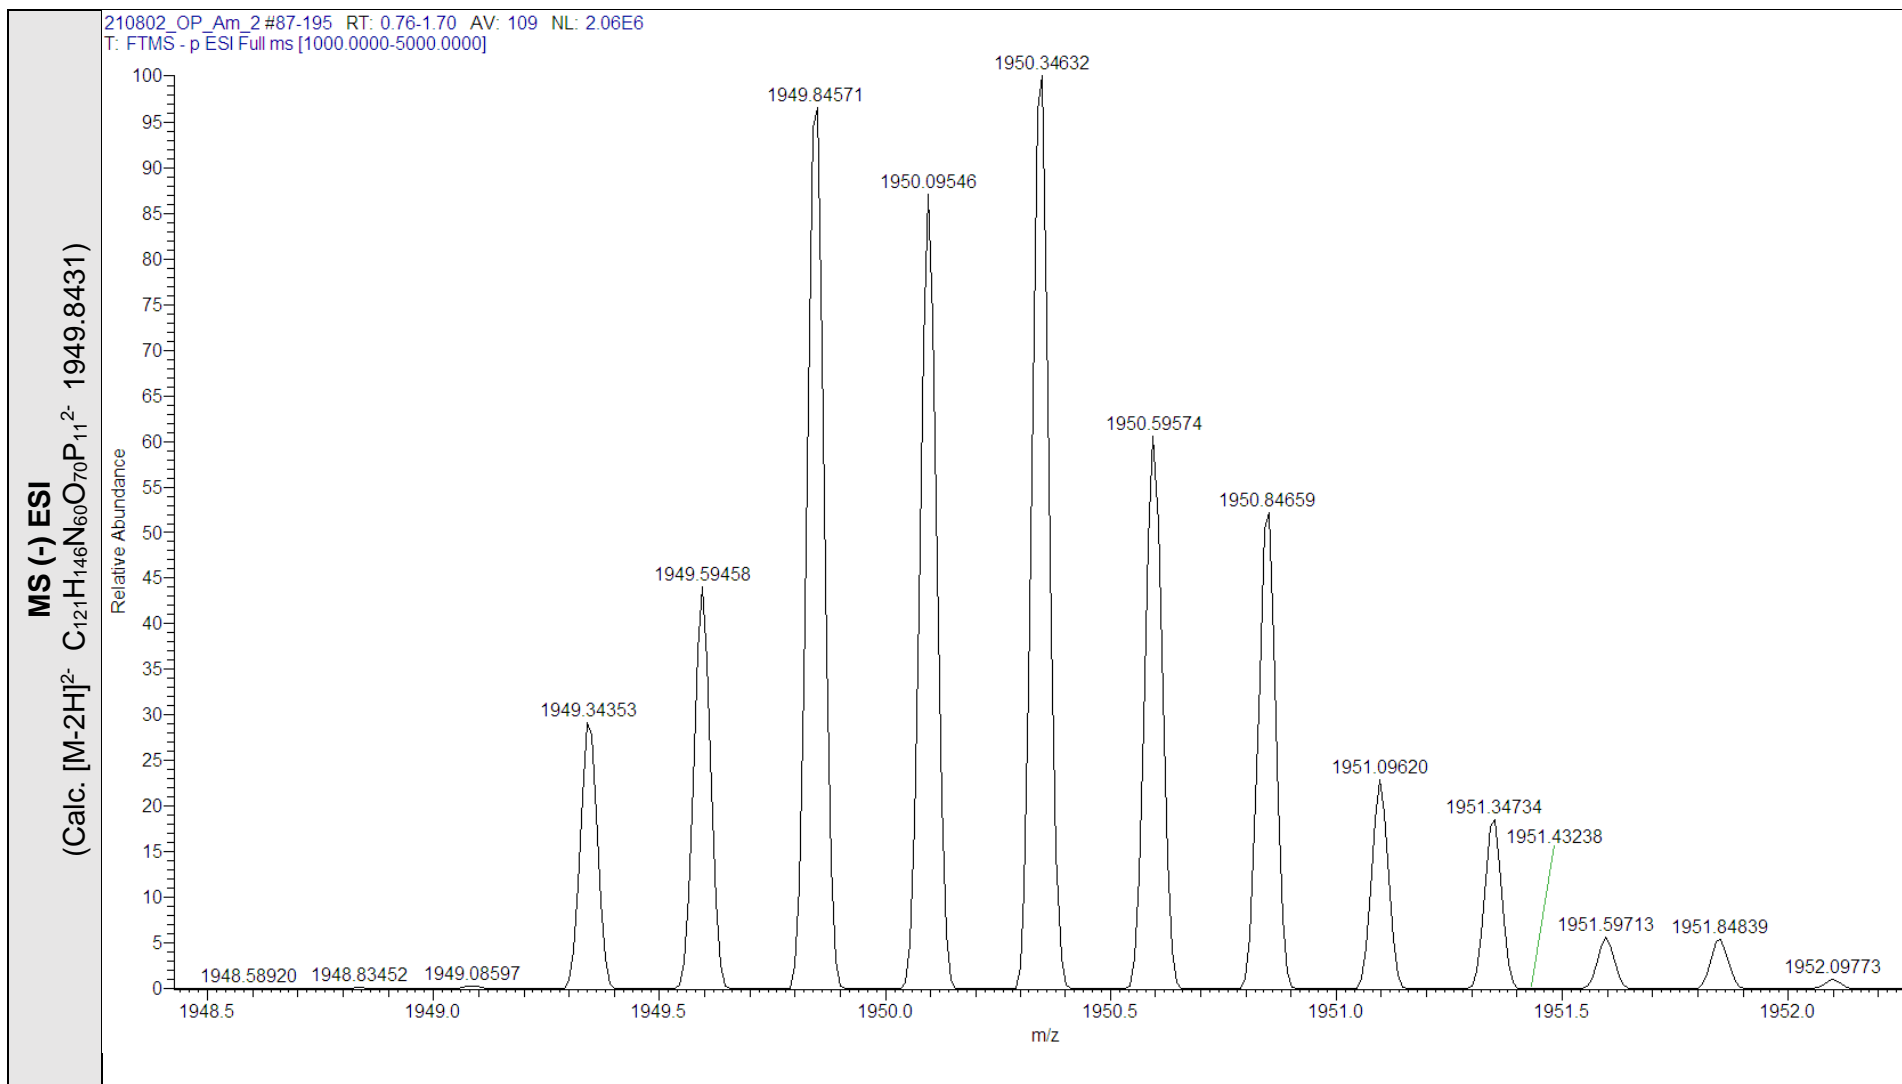

**Am11A (Am4)**

Chemical structure

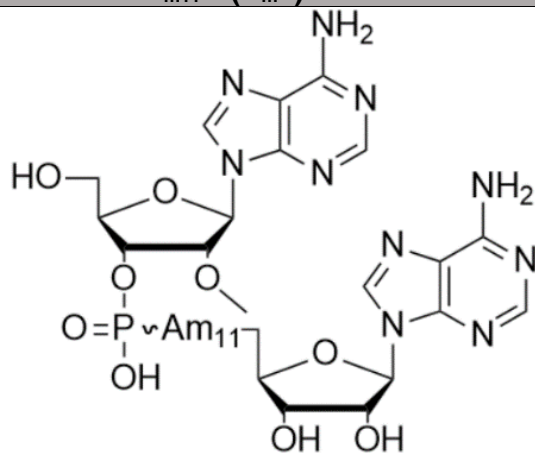

**Am11A**

RP HPLC

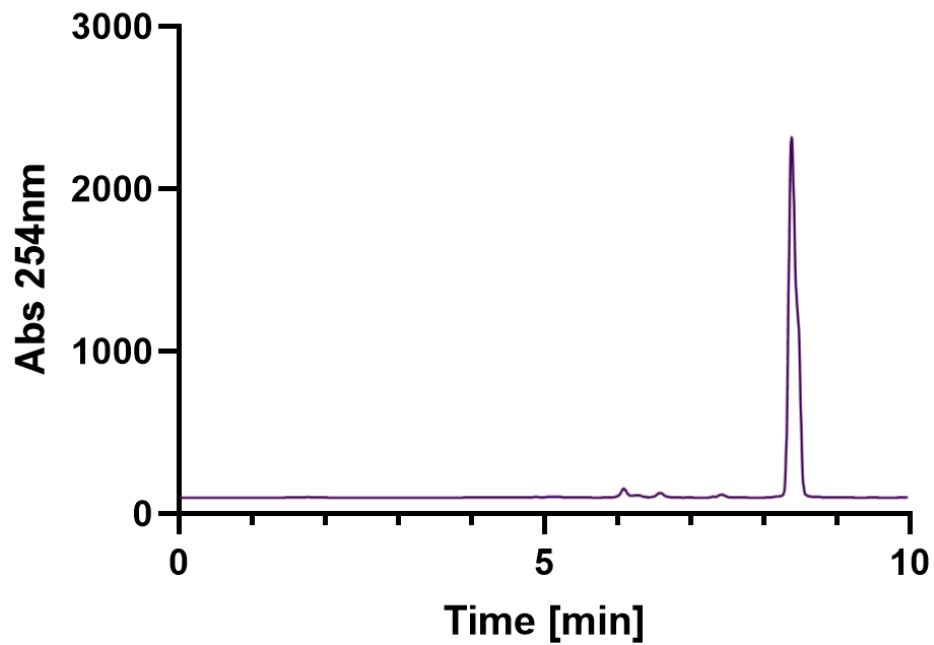

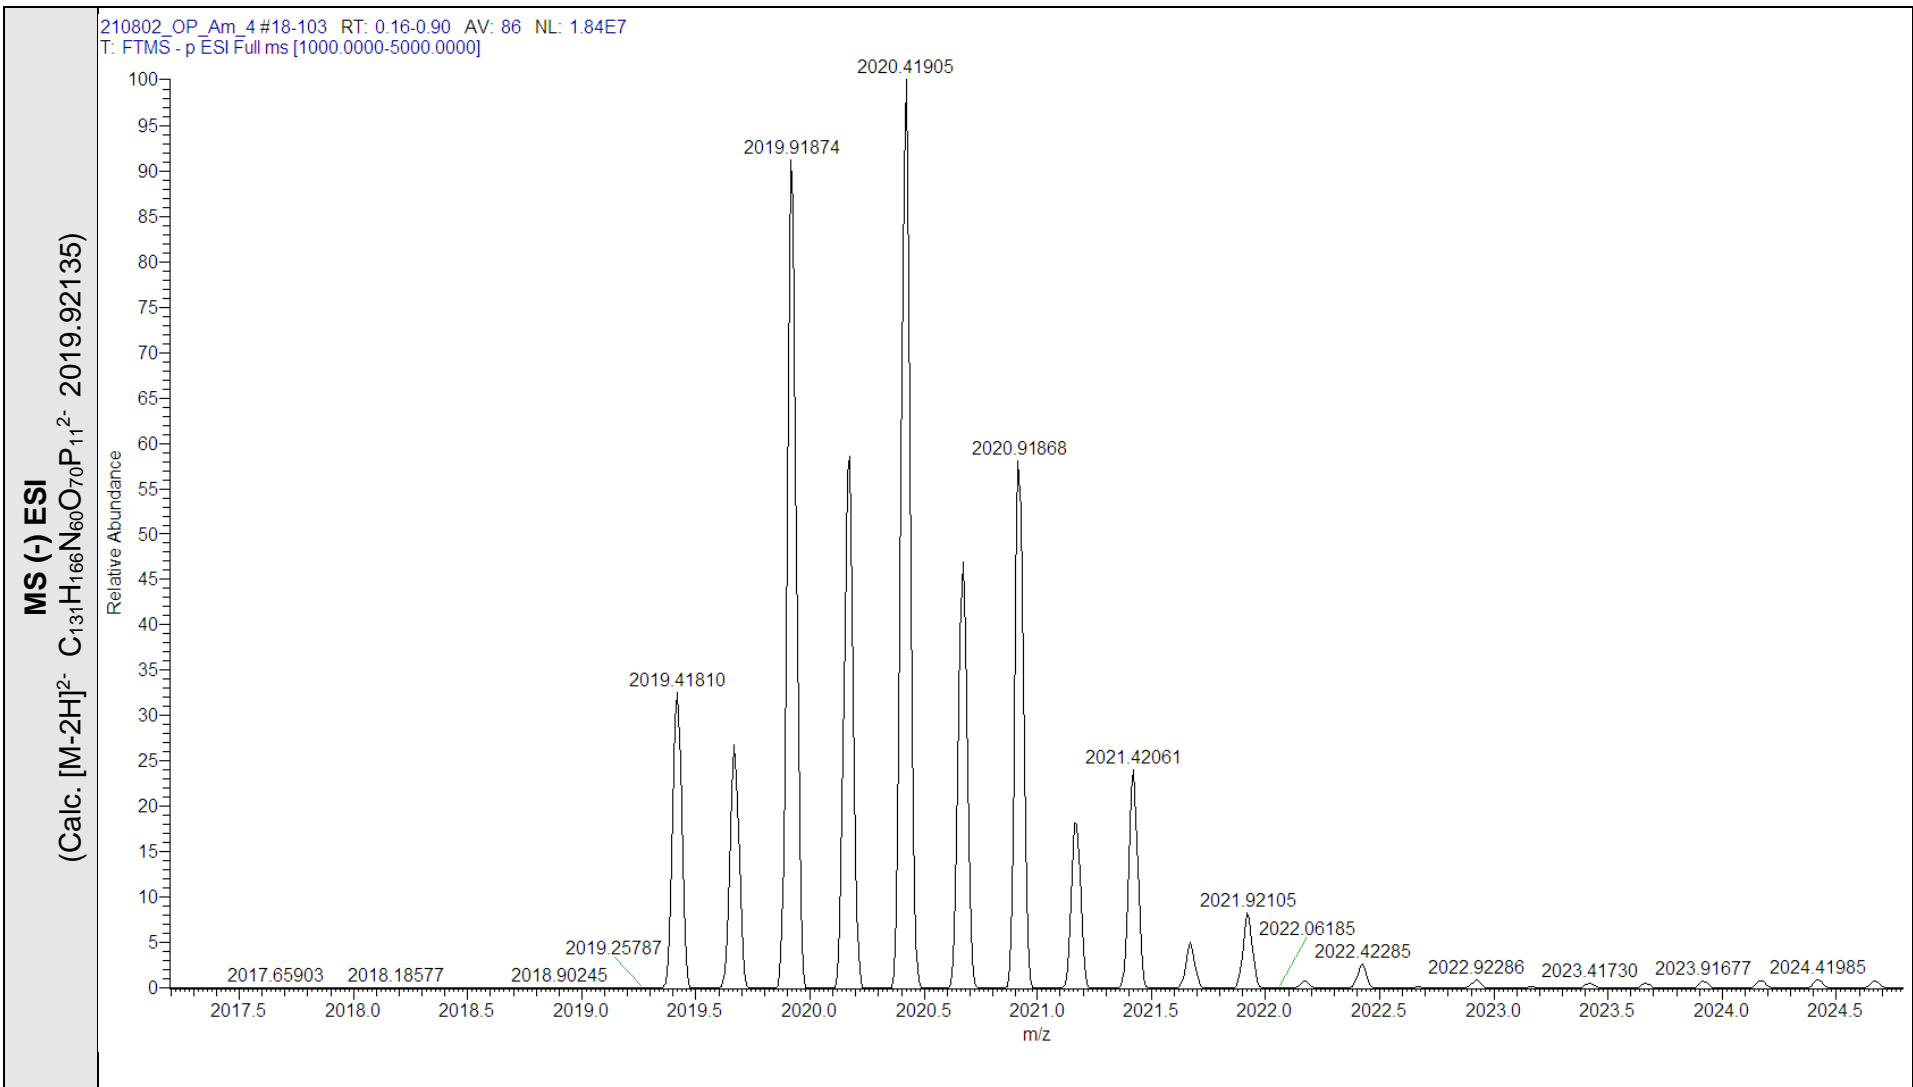

**AmA<sub>10</sub>Am (Am5)**

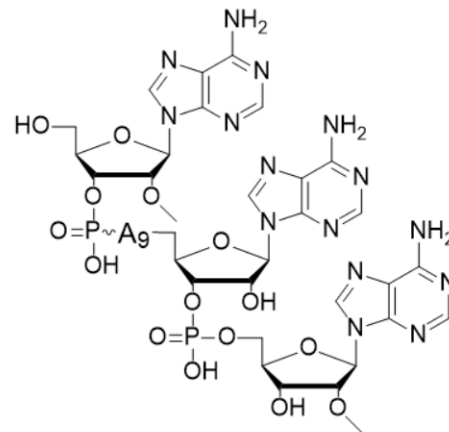

Chemical structure

**AmA<sub>10</sub>Am**

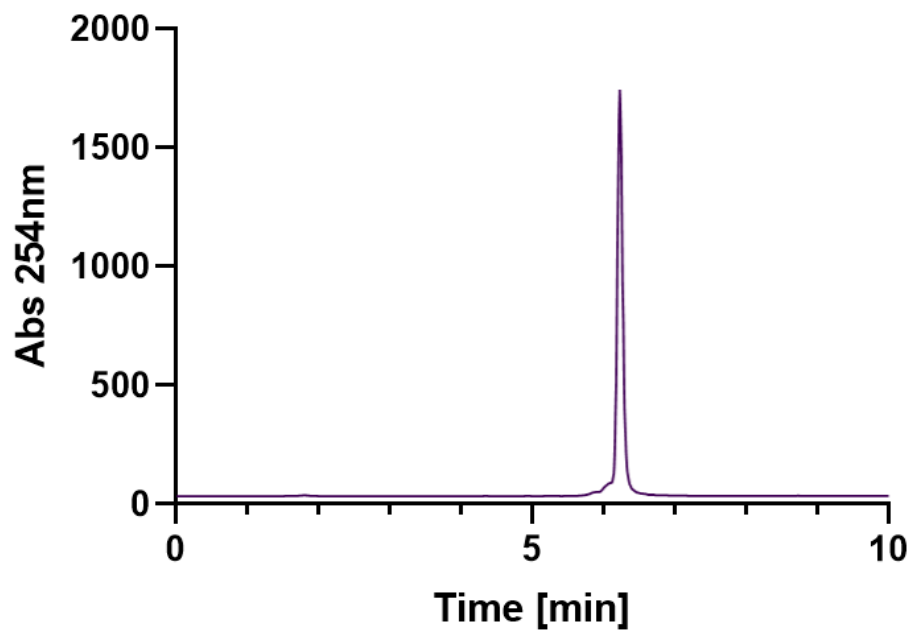

RP HPLC

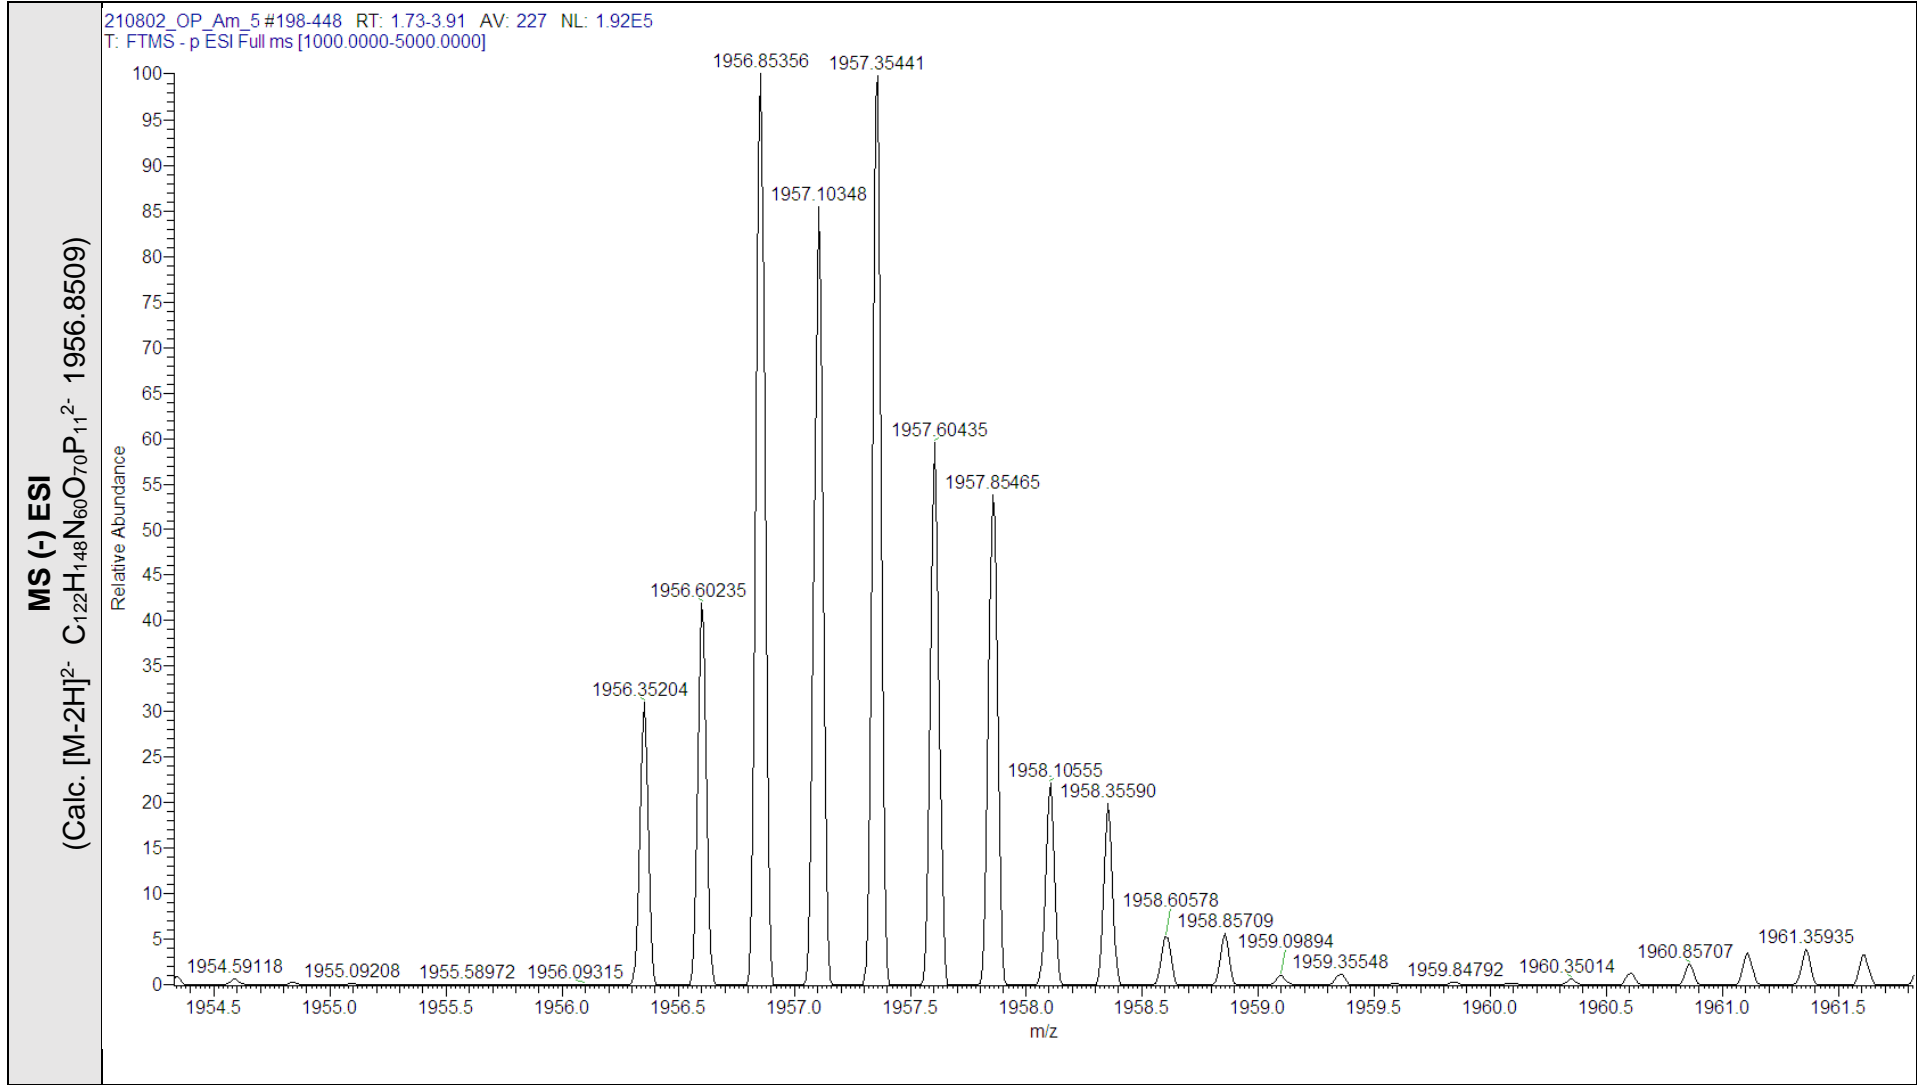



**Amp<sub>s</sub>A<sub>m10</sub>Ap<sub>s</sub>A<sub>m</sub> (A<sub>m6</sub>)**

Chemical structure

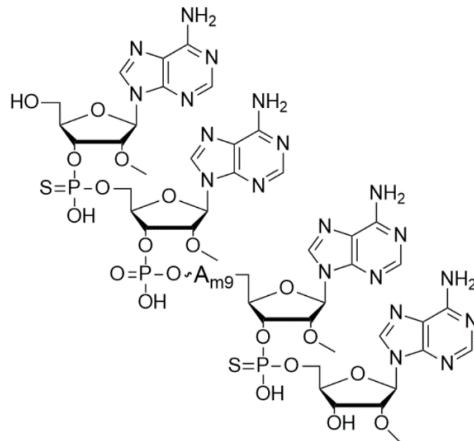

RP HPLC

**Amp<sub>s</sub>A<sub>m10</sub>Amp<sub>s</sub>A<sub>m</sub>**

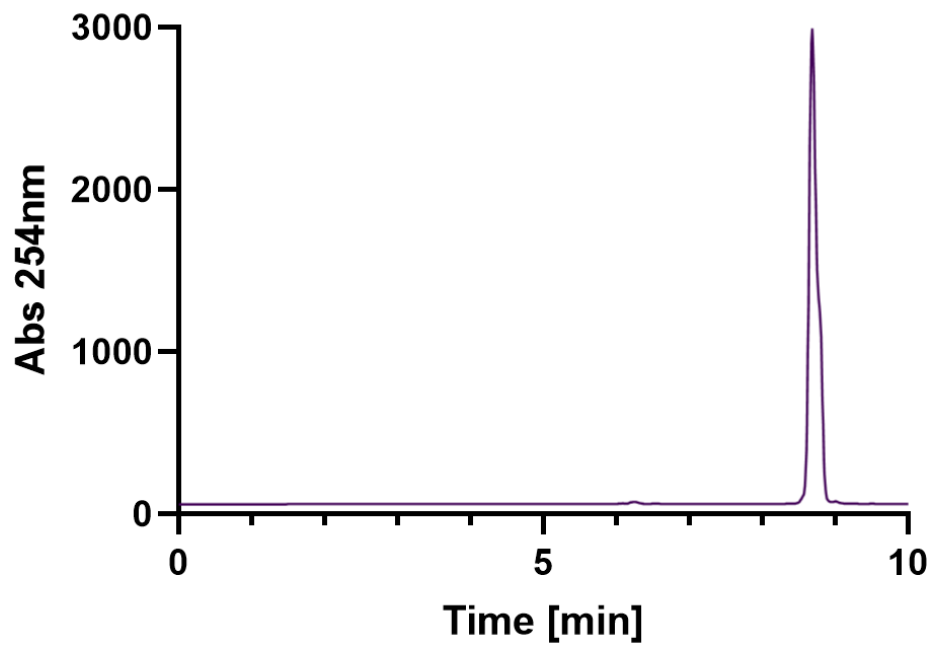

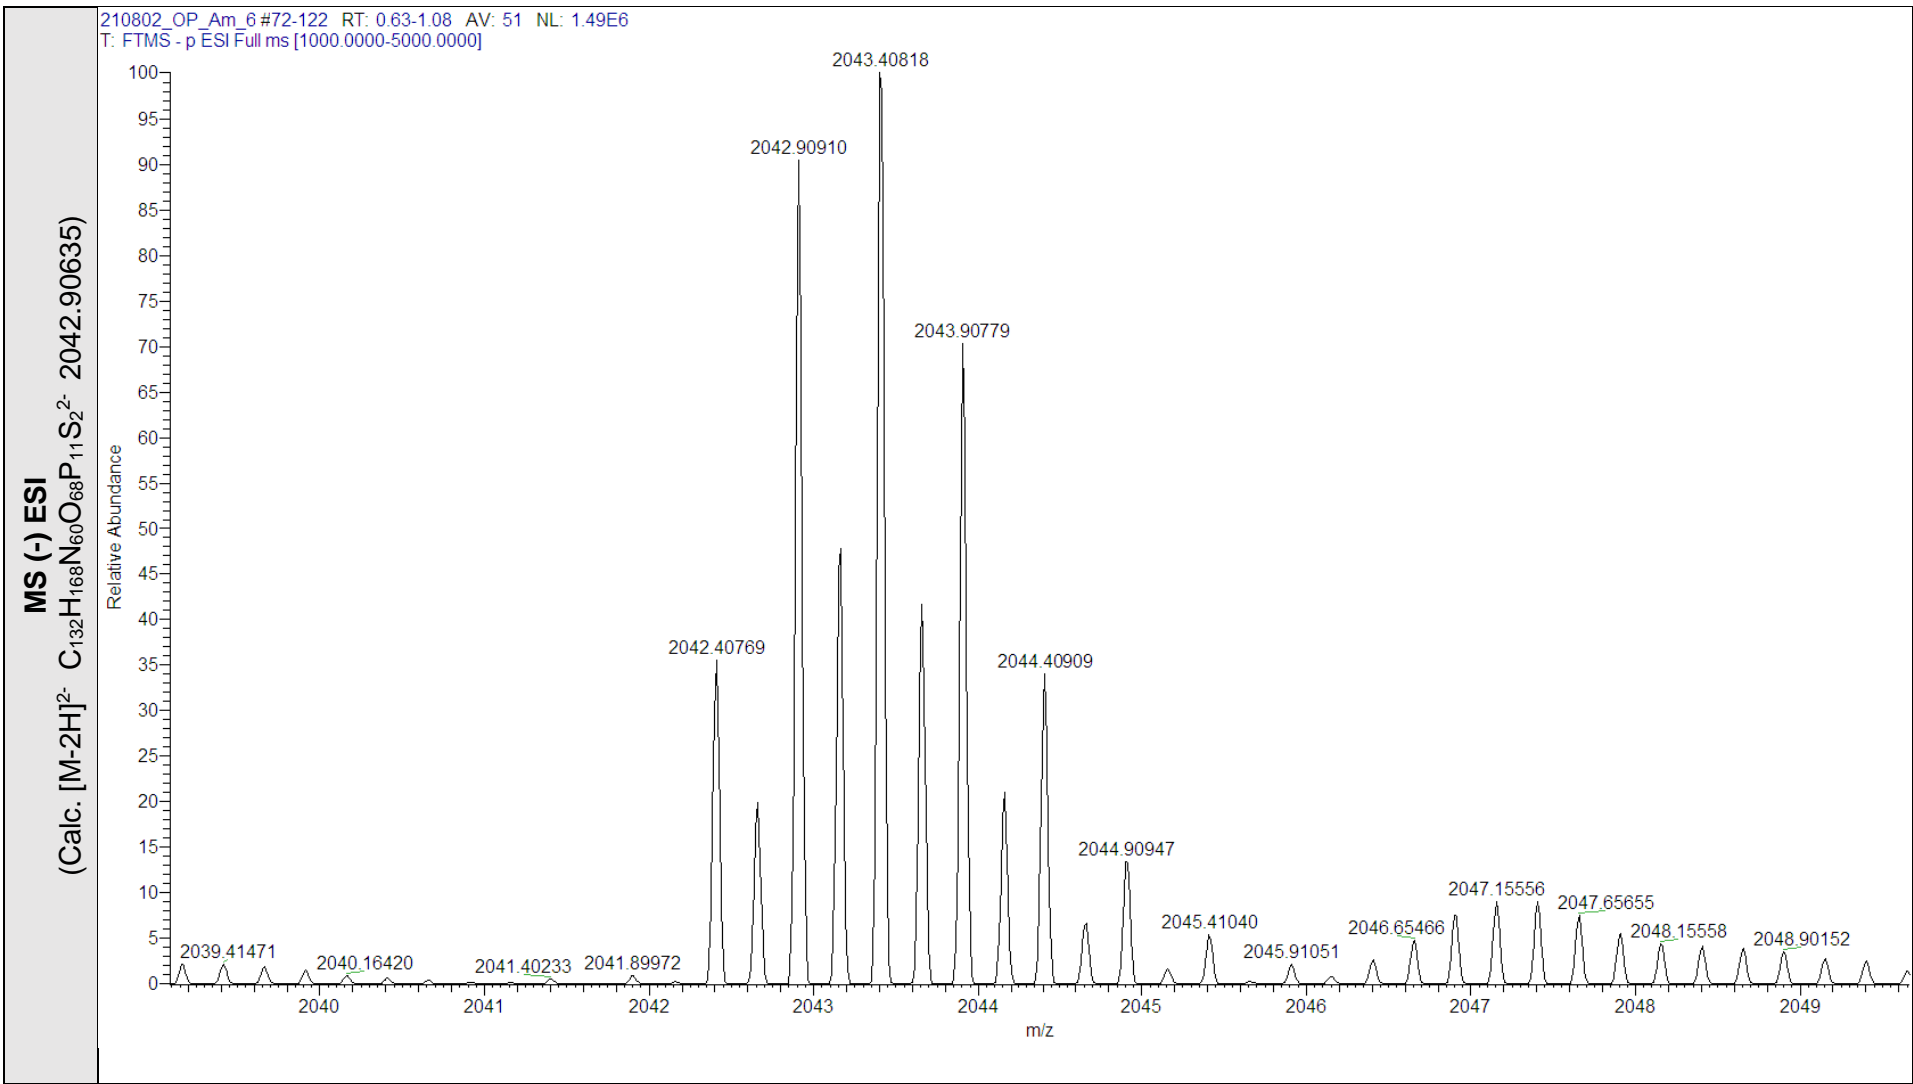

**A<sub>11</sub>A<sub>m</sub> (A<sub>m</sub>7)**

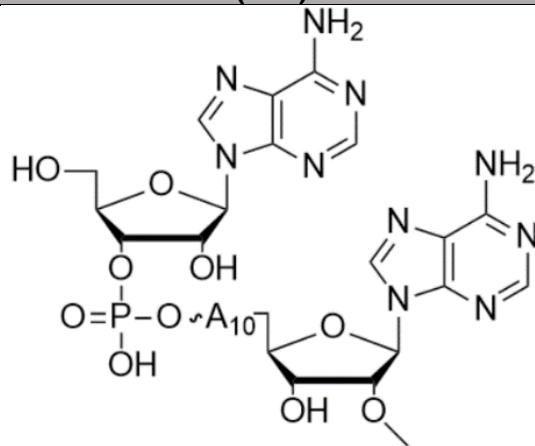

**A<sub>11</sub>A<sub>m</sub>**

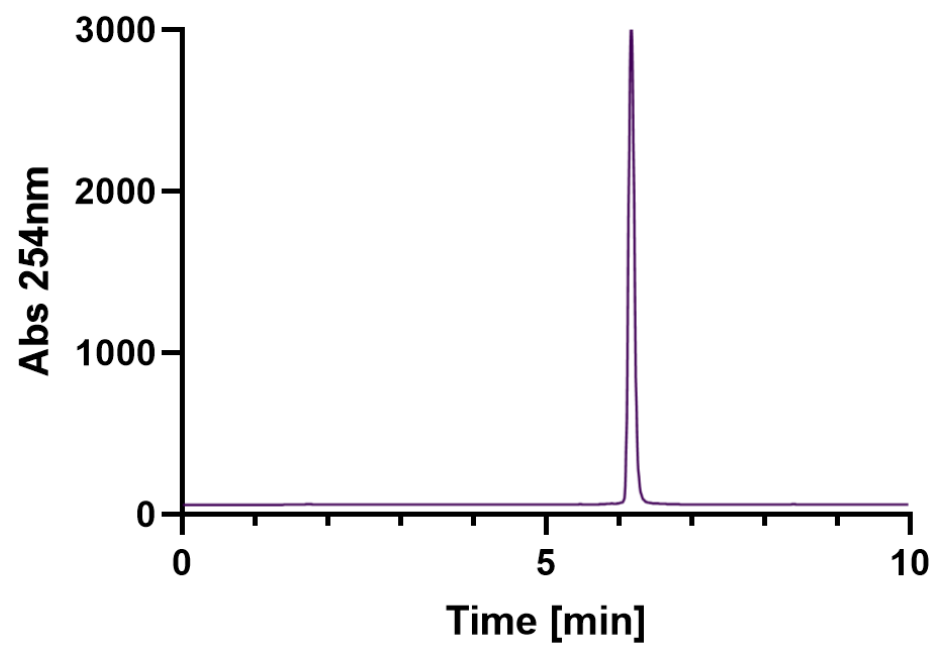

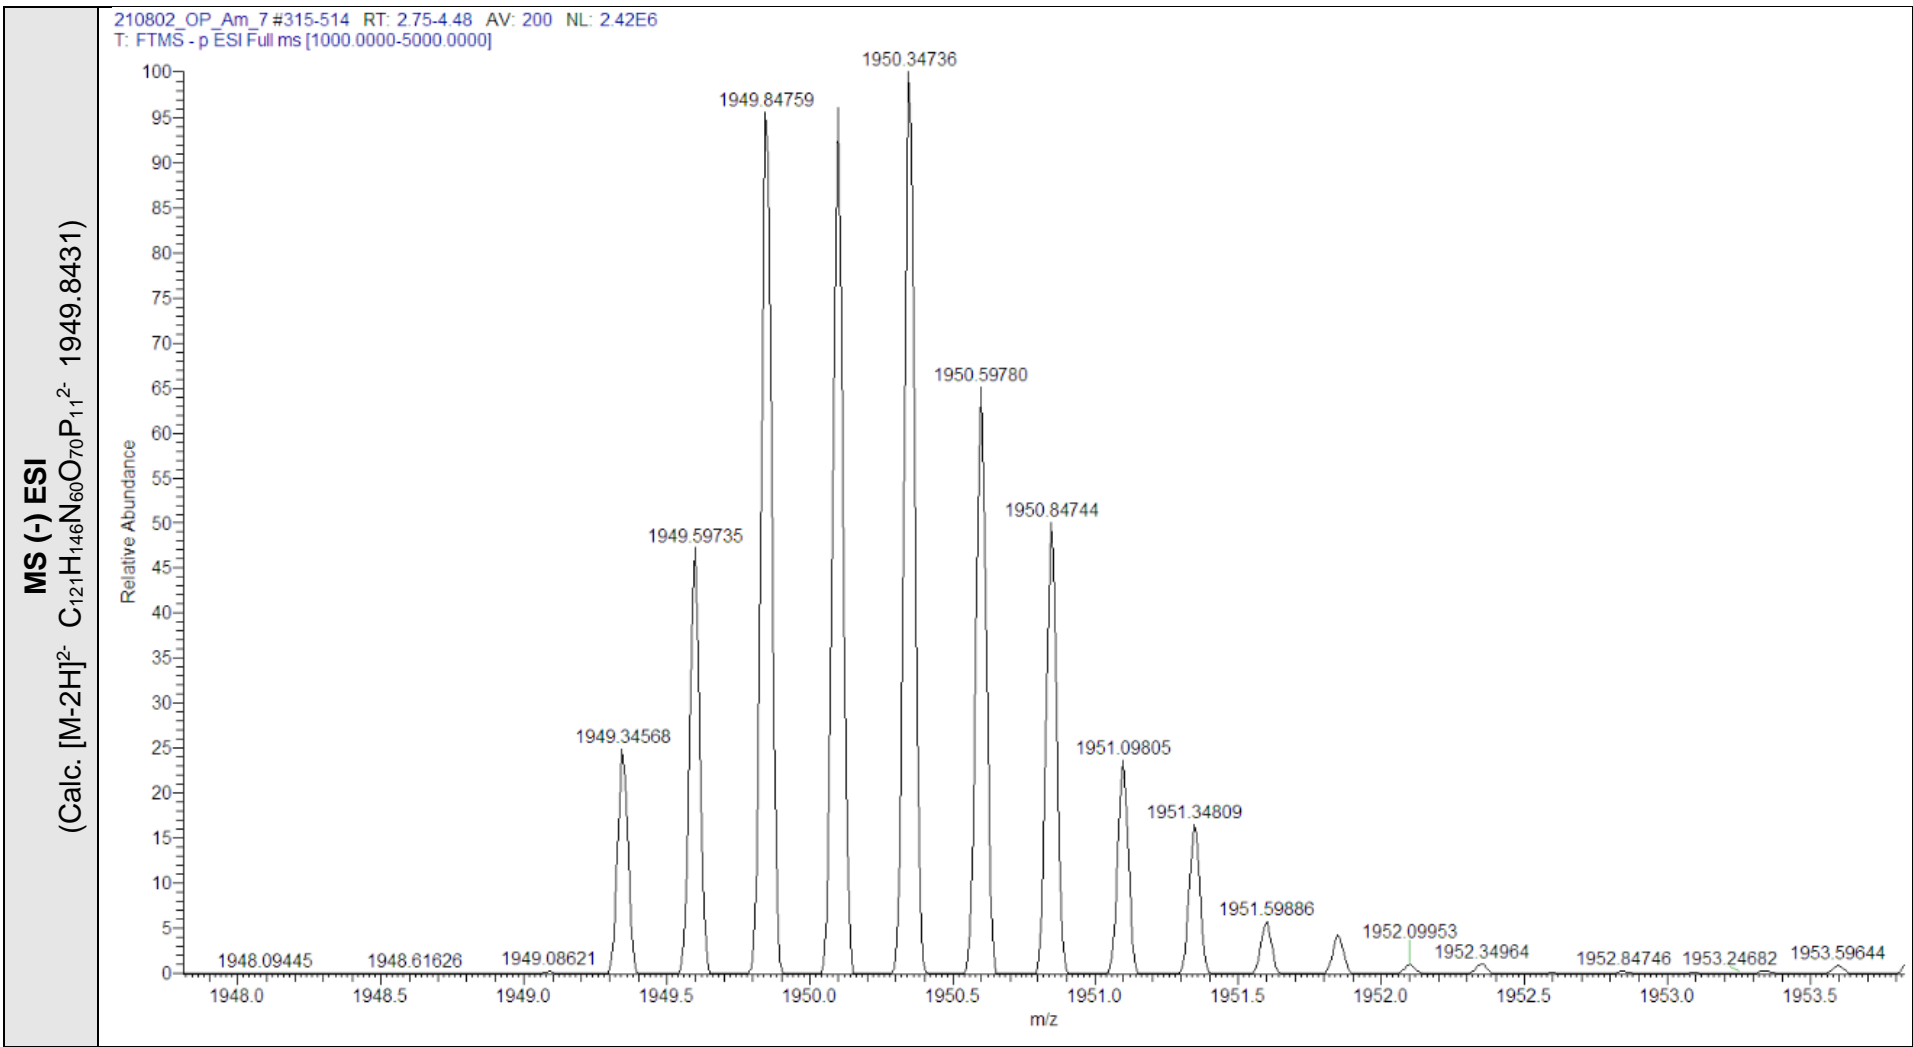

**A<sub>10</sub>m<sup>6</sup>AA (m<sup>6</sup>A1)**

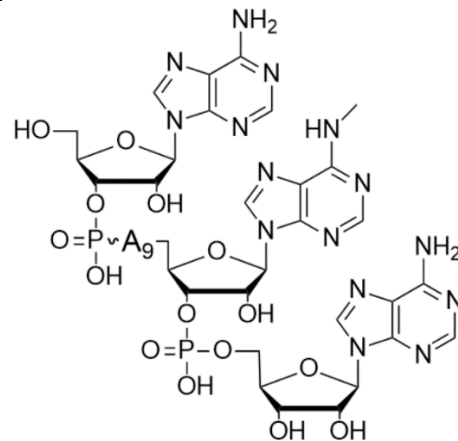

**A<sub>10</sub>m<sup>6</sup>AA**

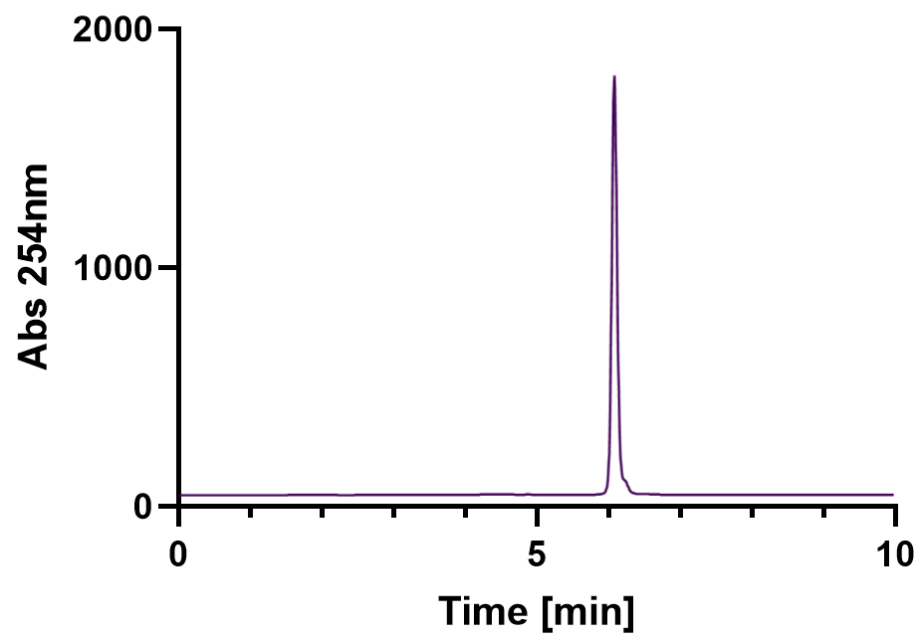

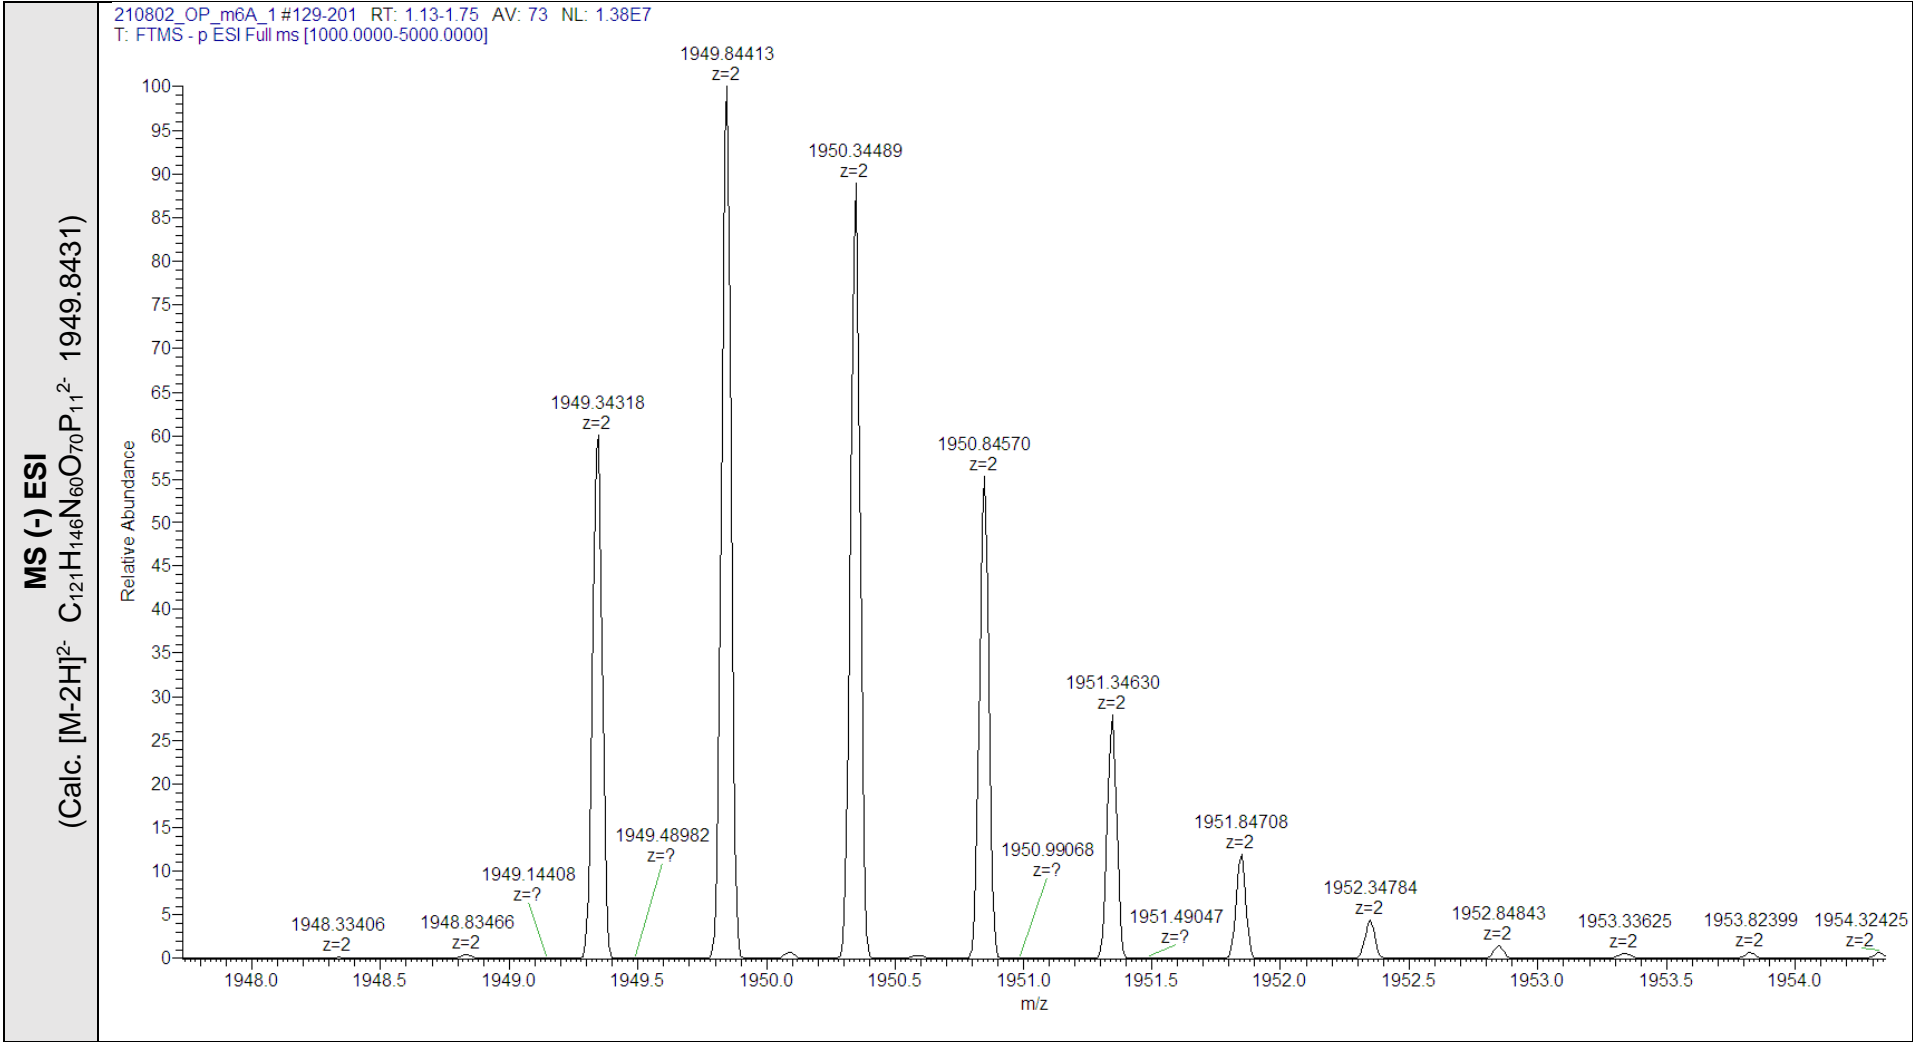



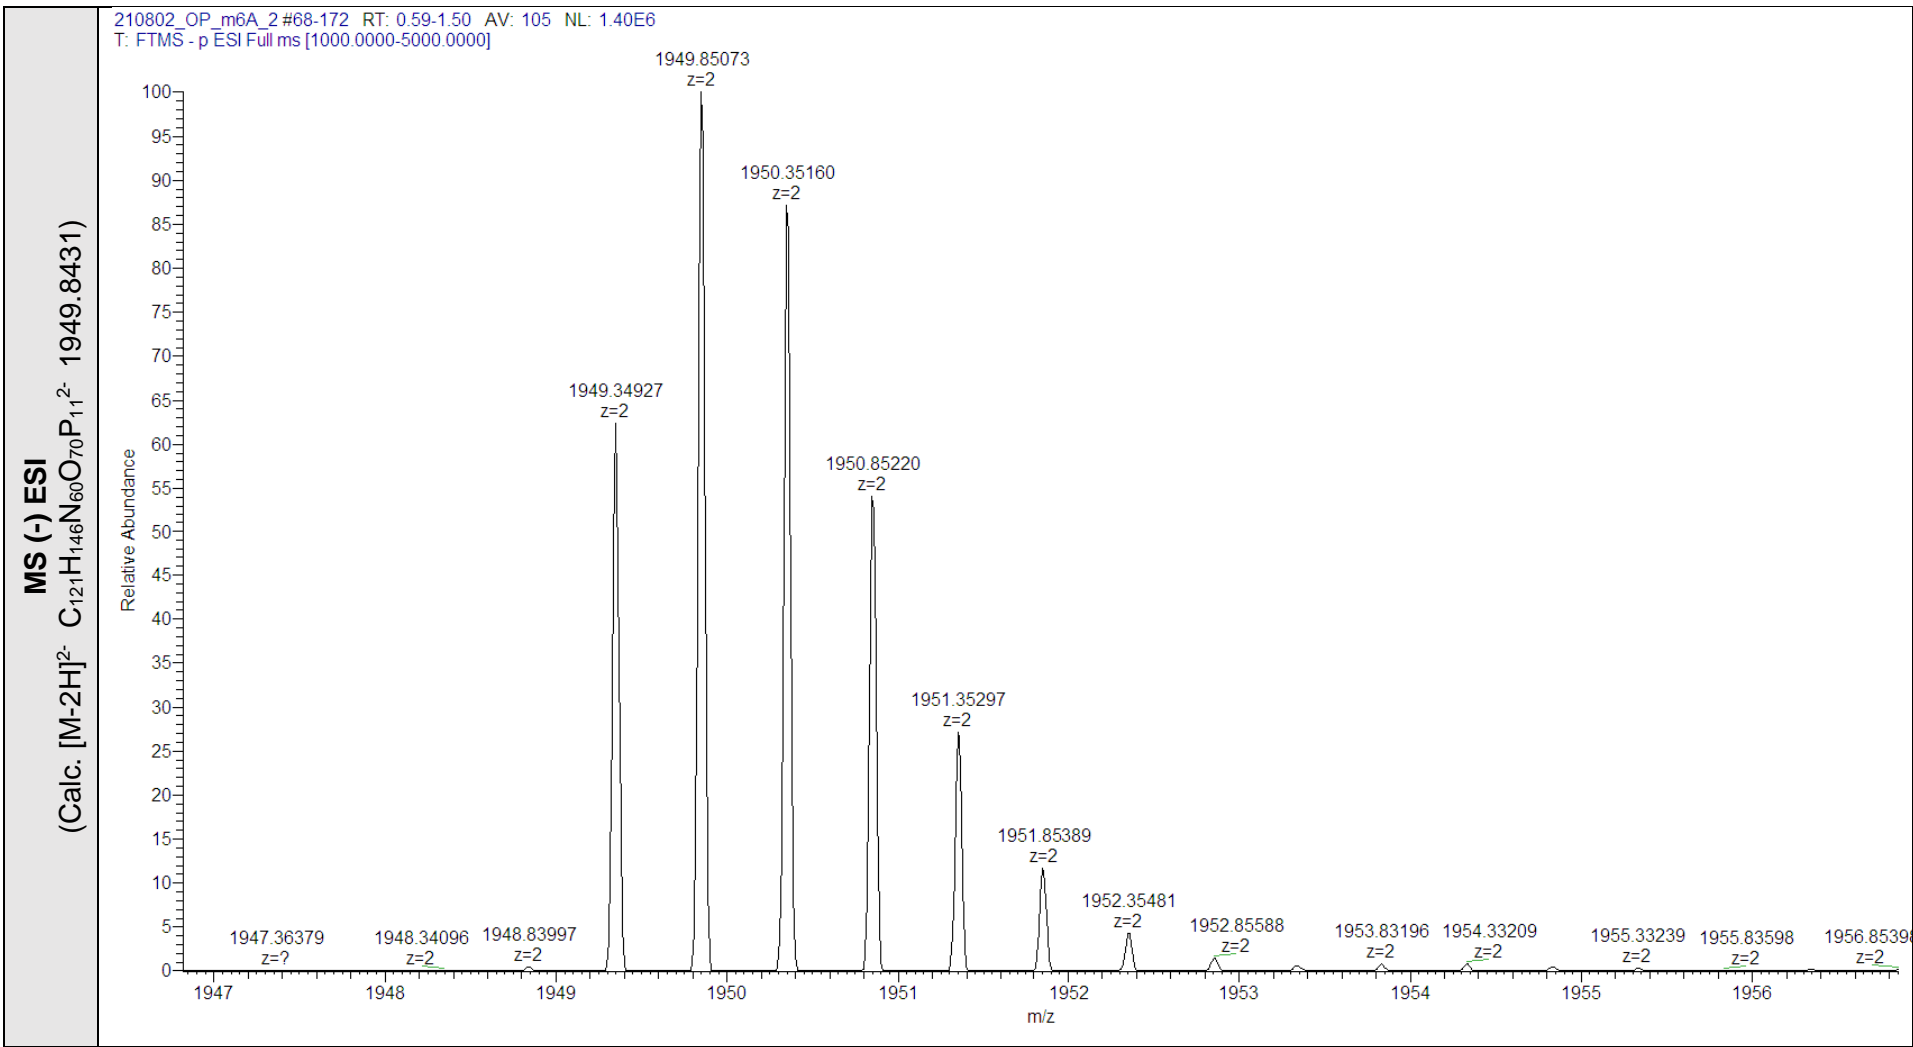



**m<sup>6</sup>A-A<sub>11</sub> (m<sup>6</sup>A<sub>3</sub>)**

Chemical structure

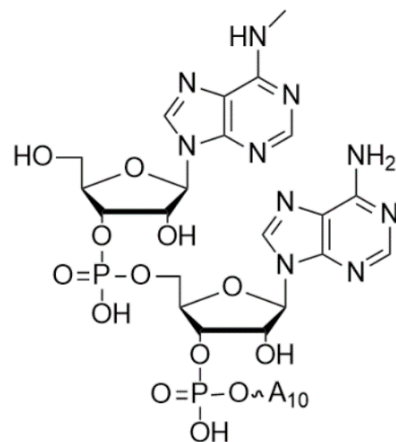

RP HPLC

**m<sup>6</sup>AA<sub>11</sub>**

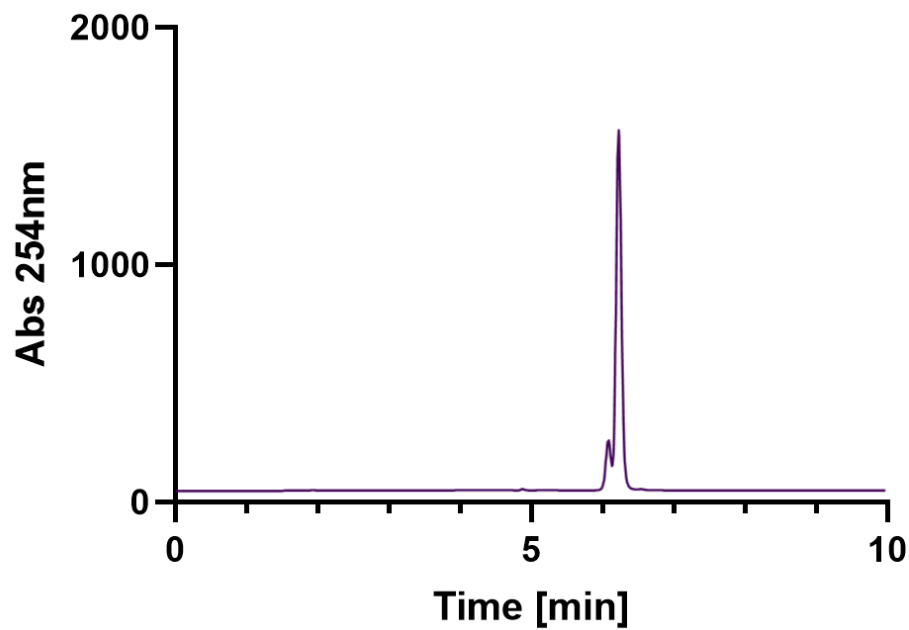

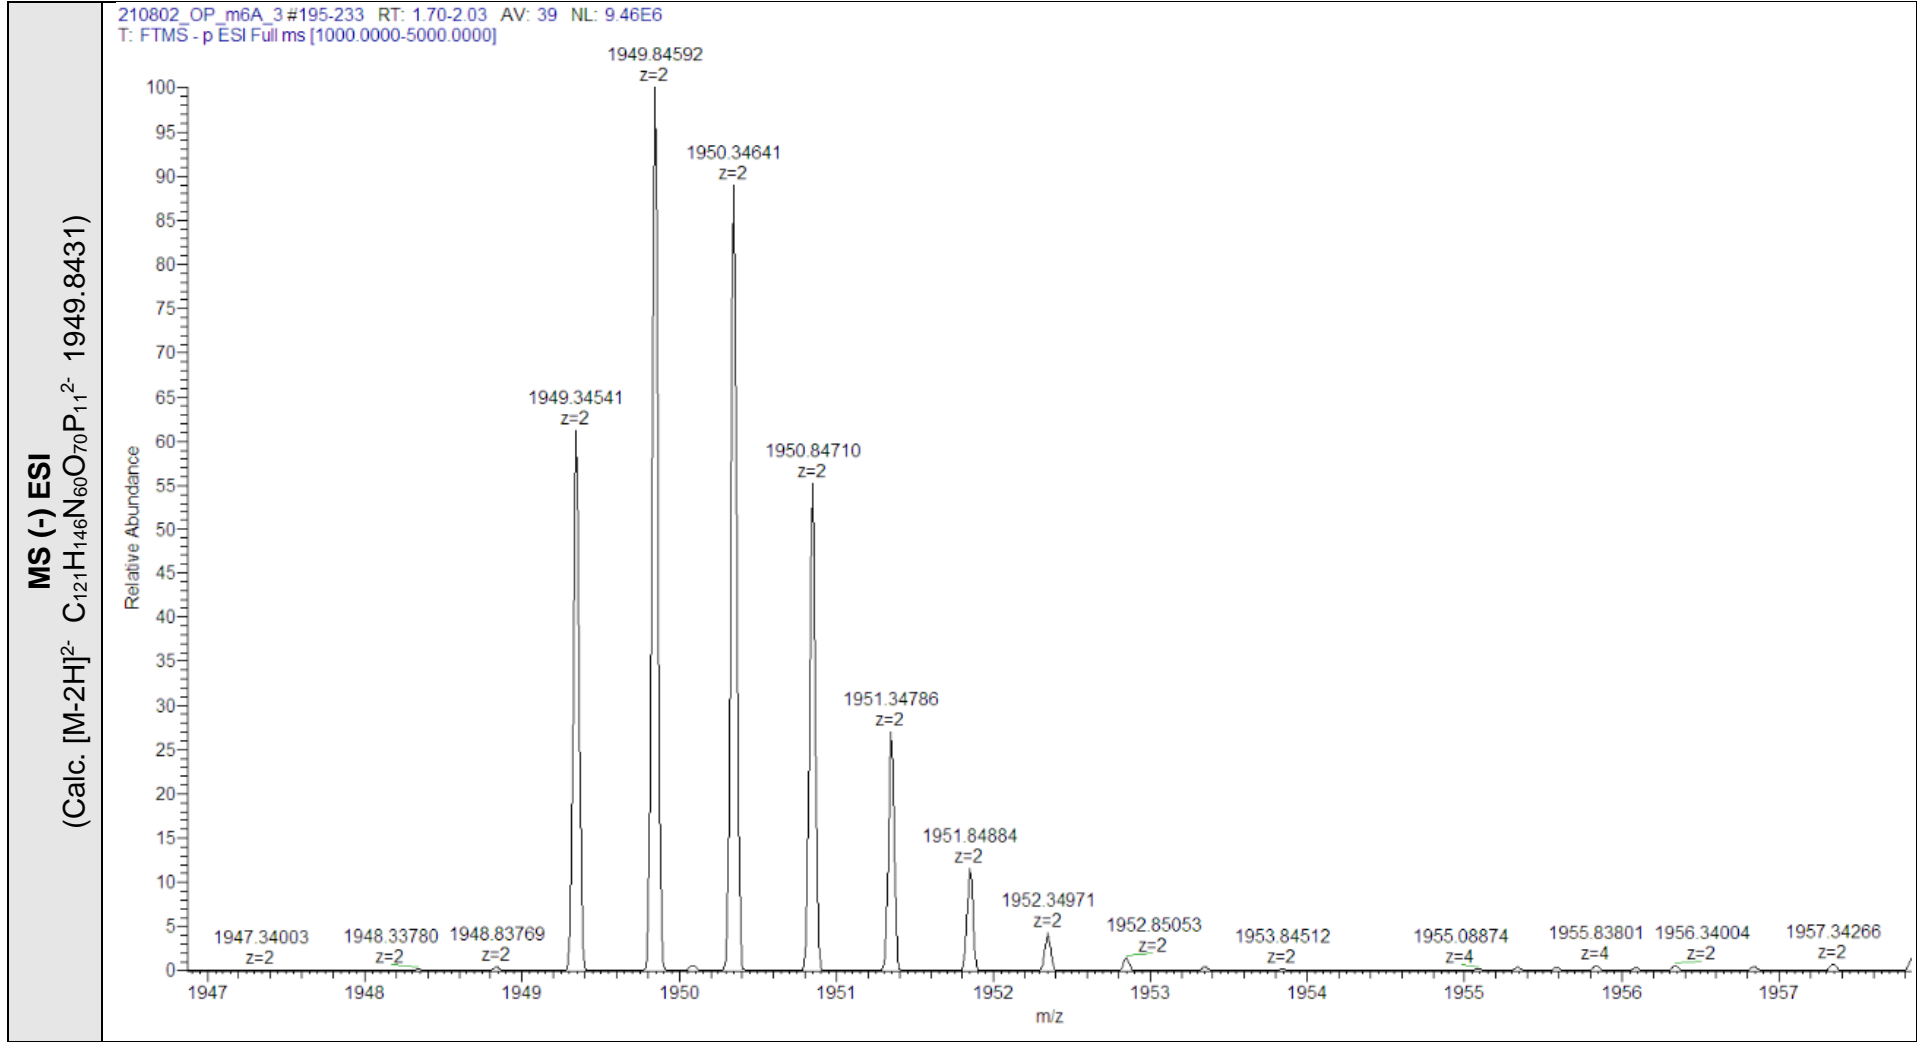

A<sub>11</sub>

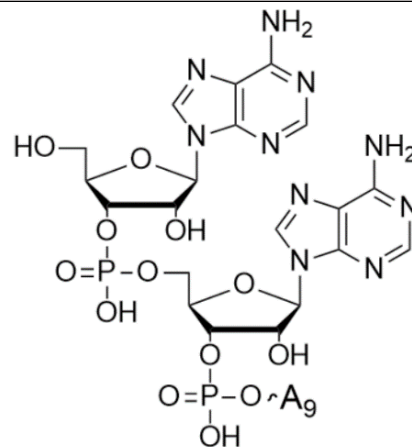

A<sub>11</sub>

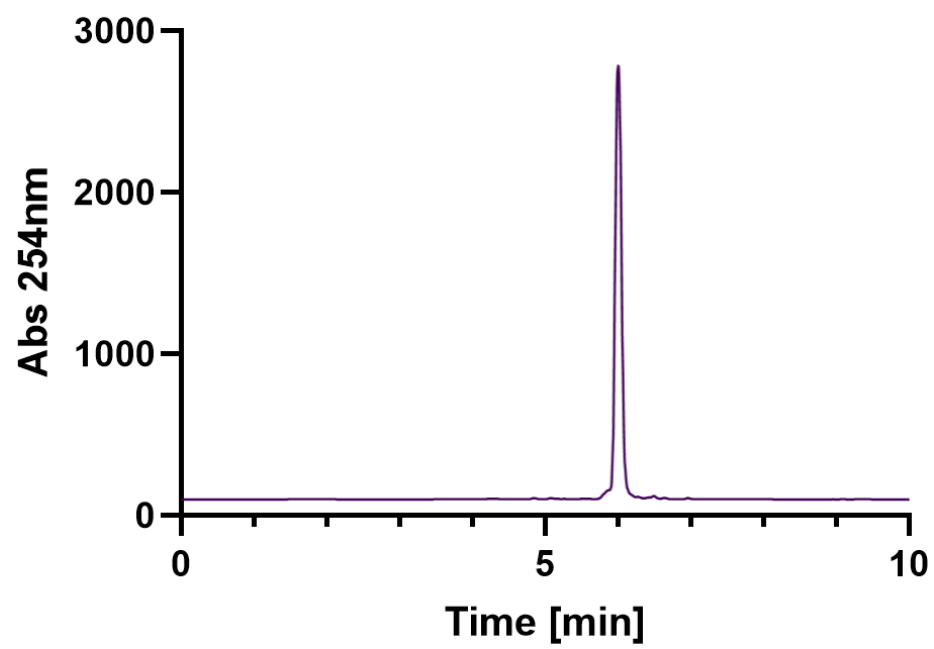

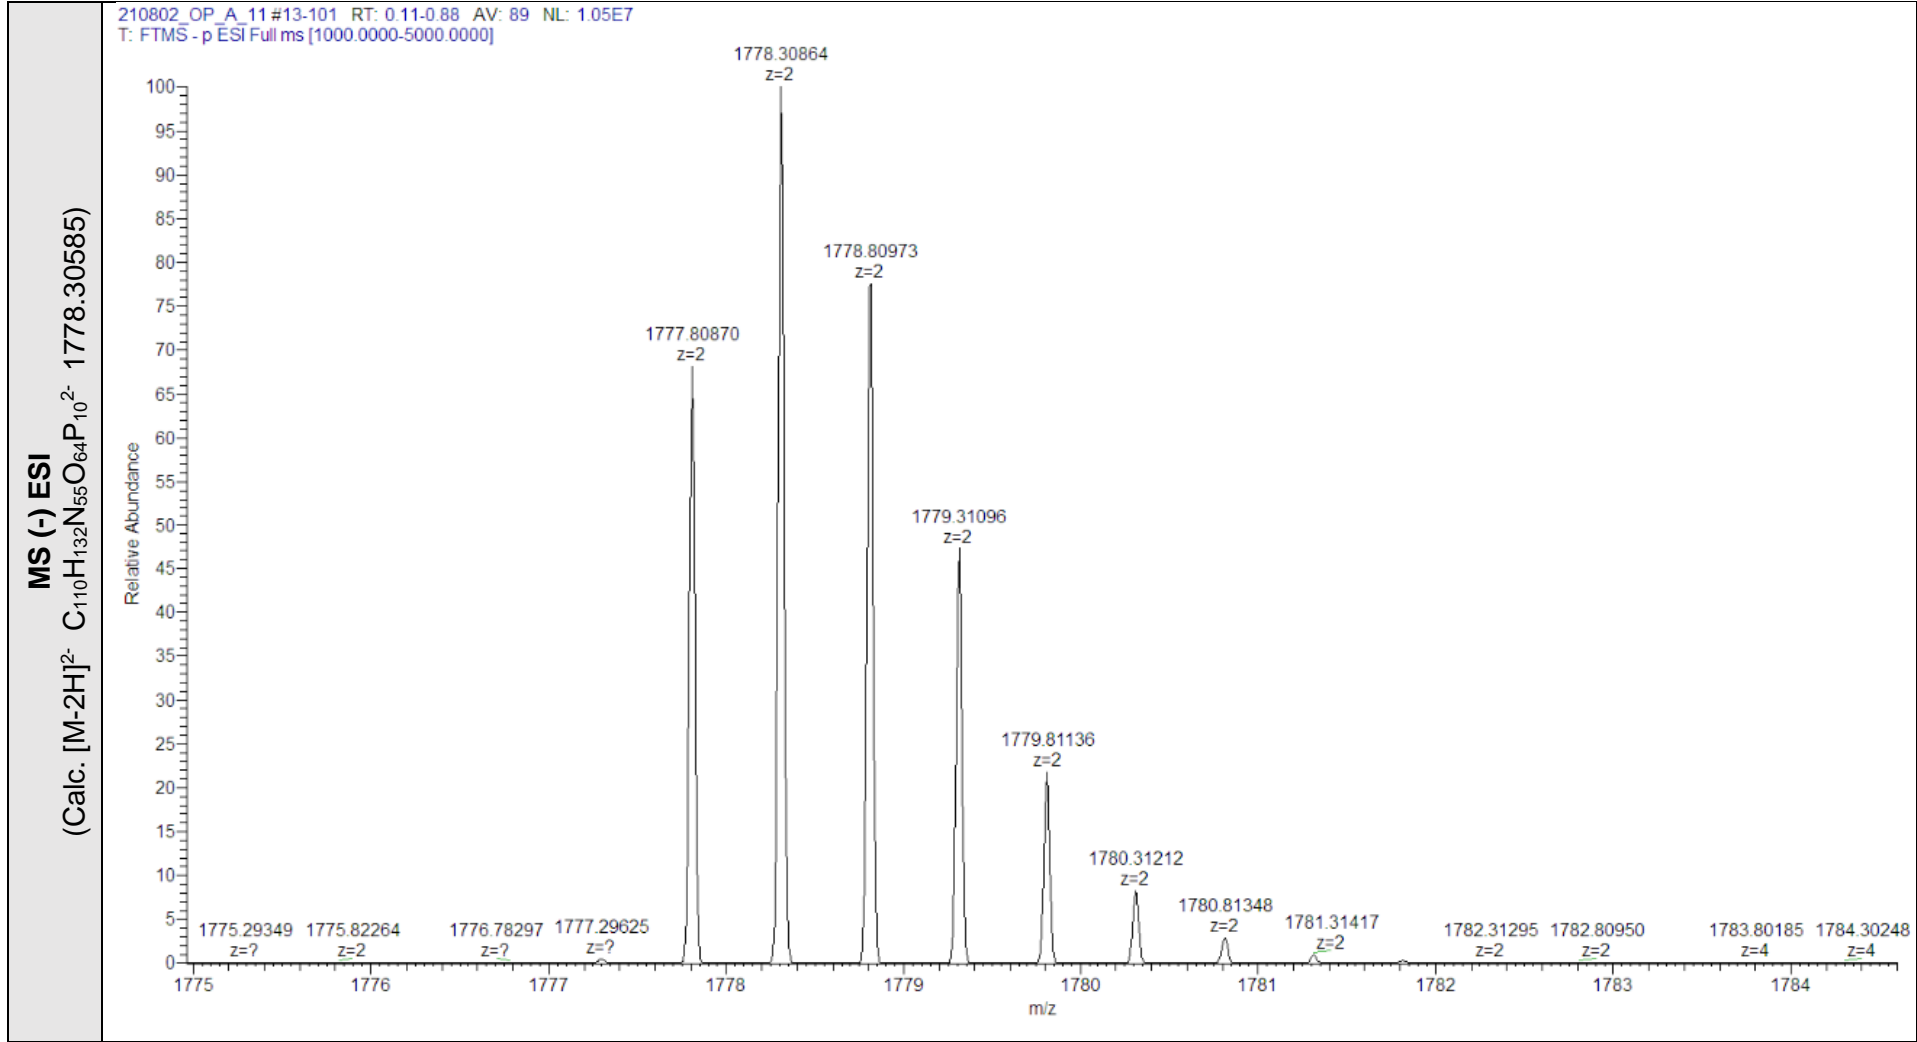

A12

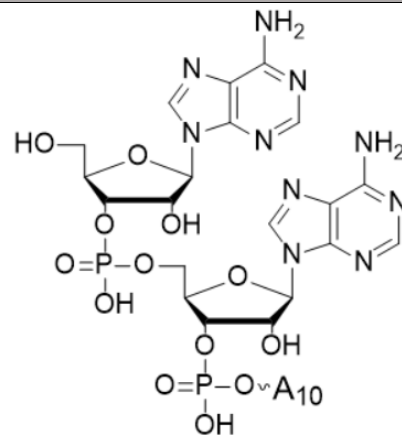

Chemical structure

RP HPLC

A12

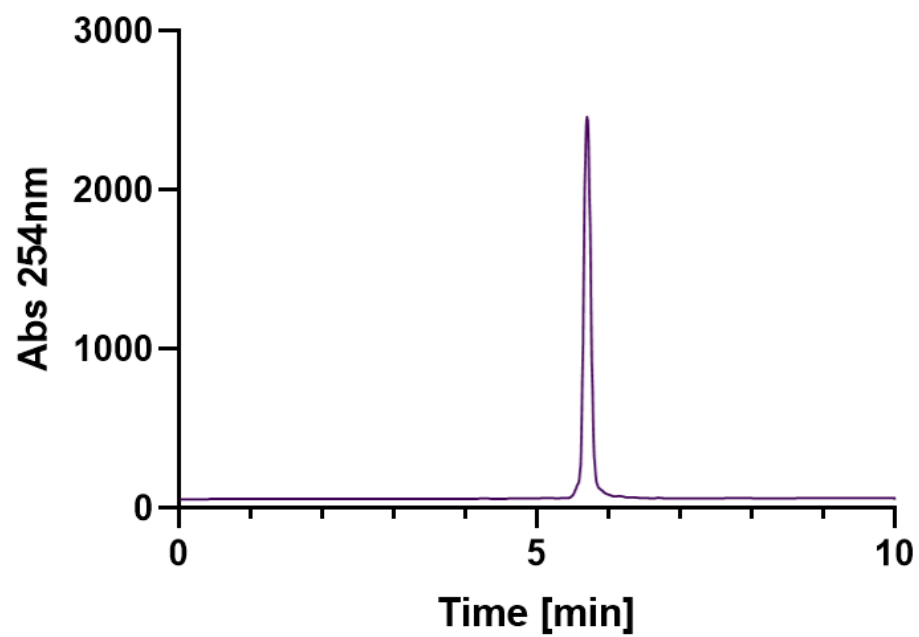

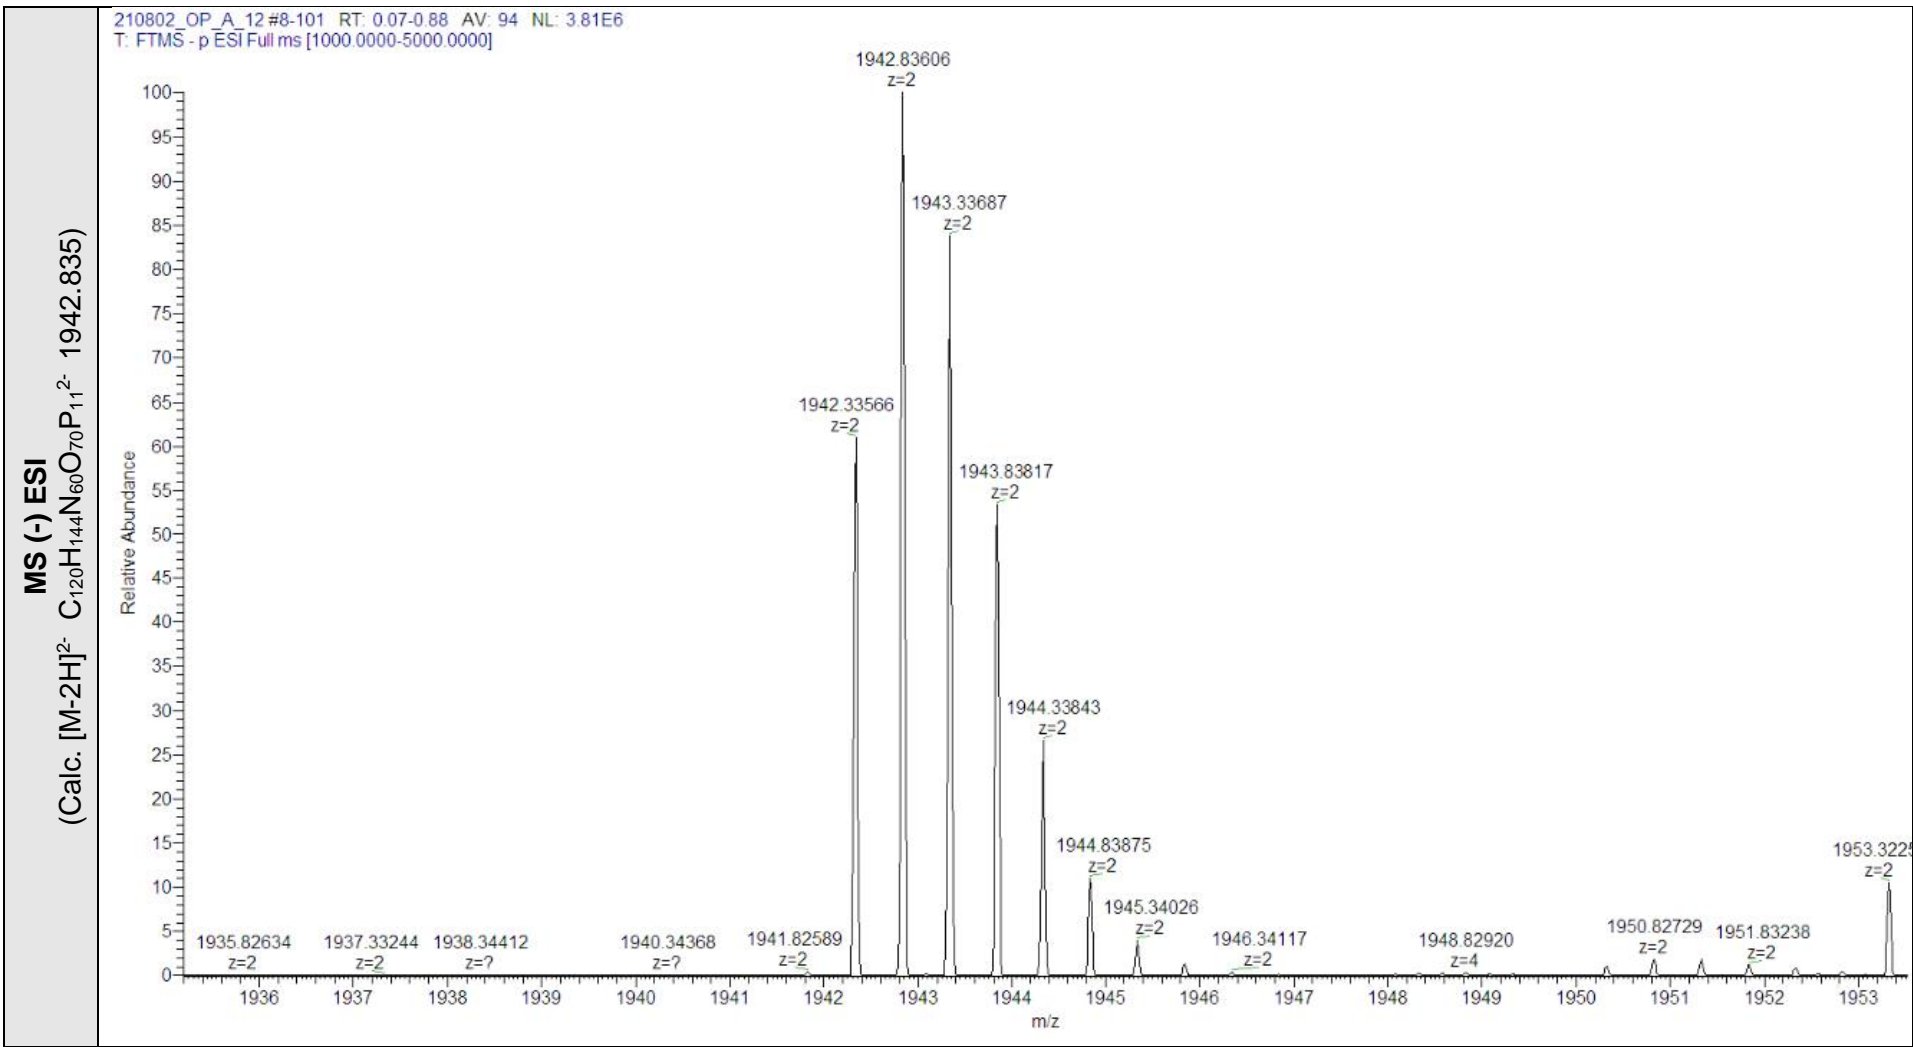

A<sub>13</sub>

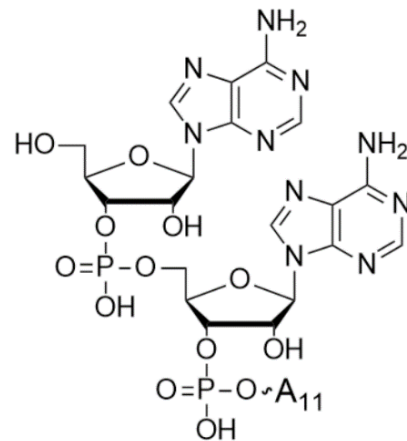

A<sub>13</sub>

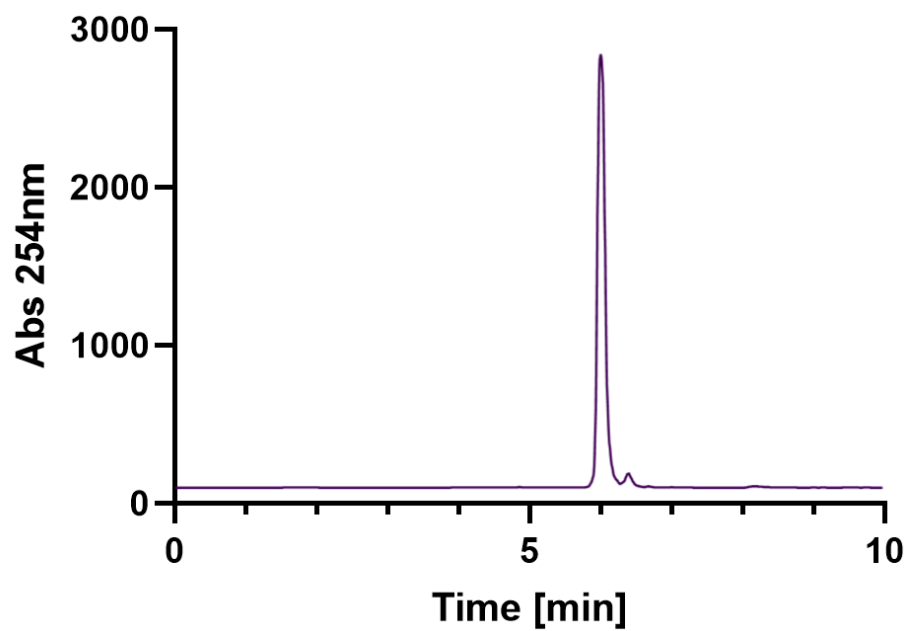

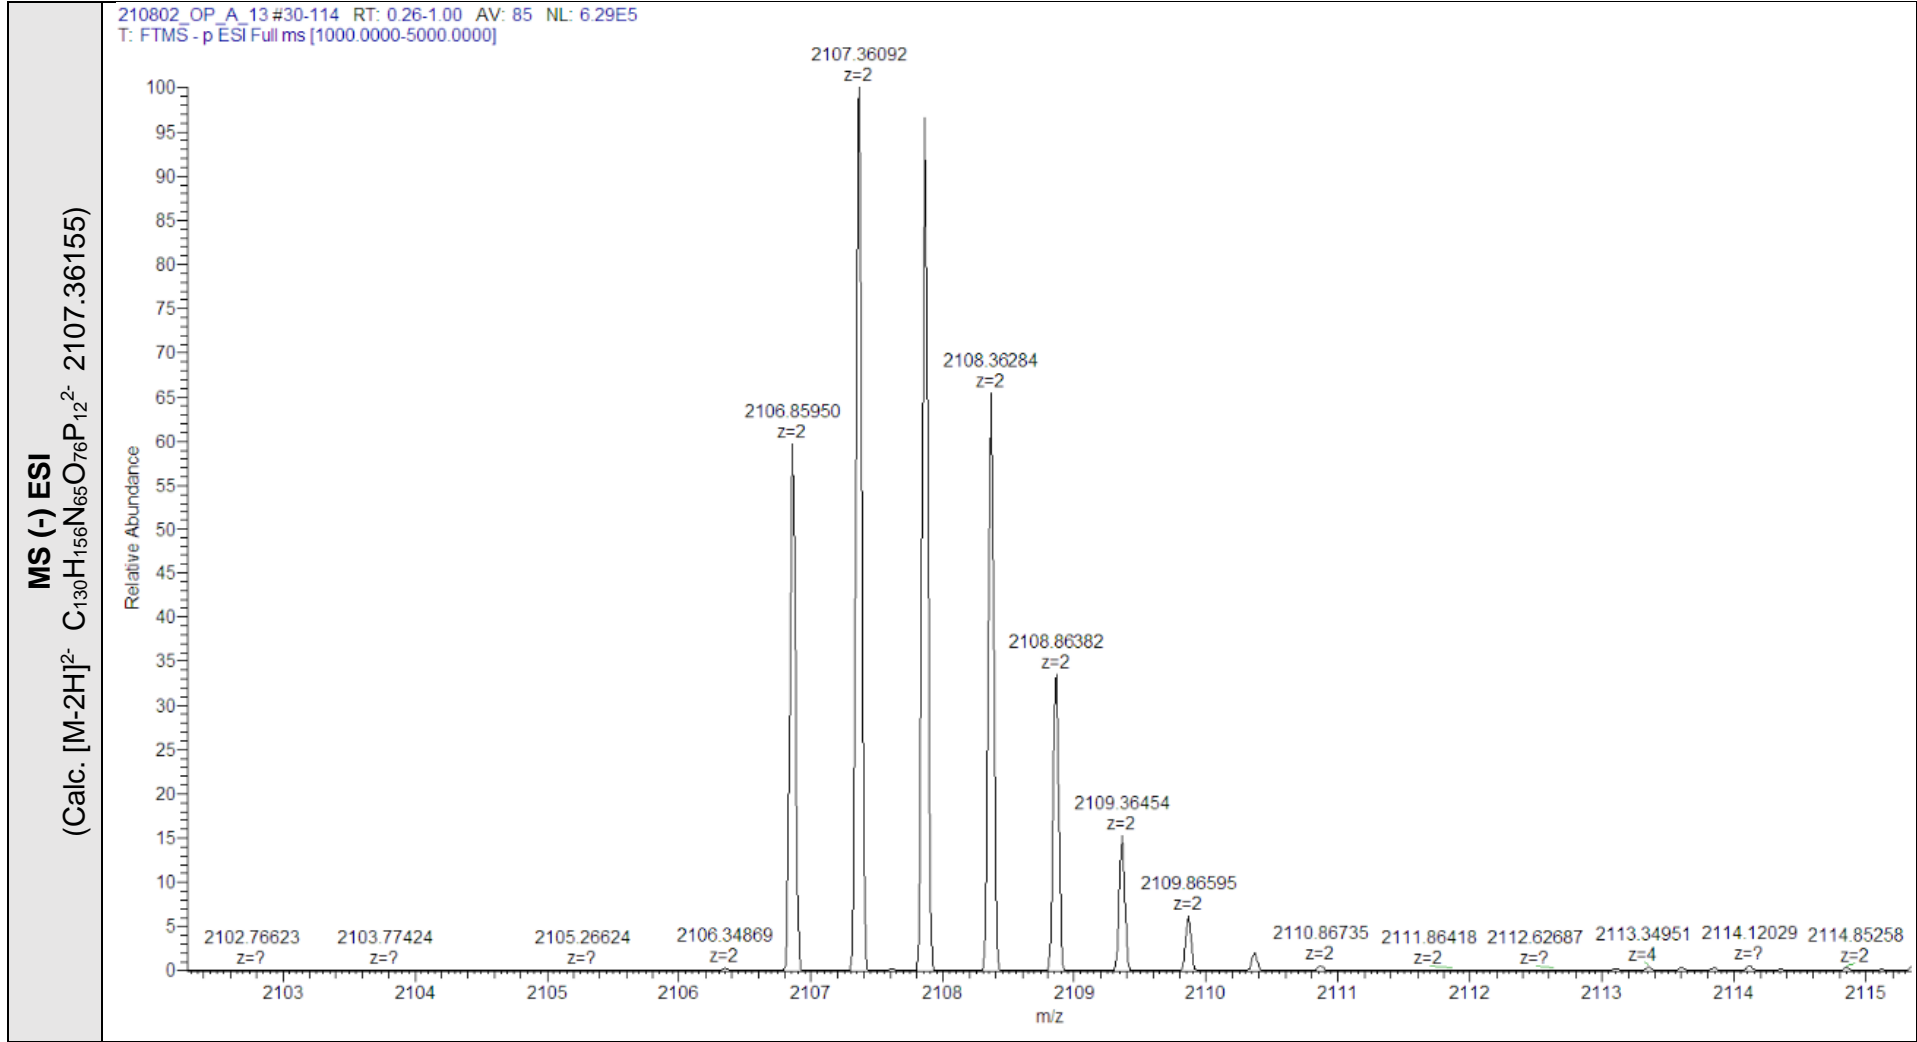



**A<sub>11</sub>G (G1)**

Chemical structure

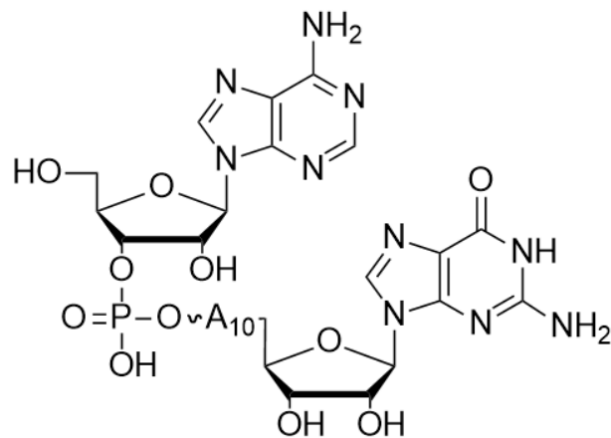

RP HPLC

**A<sub>11</sub>G**

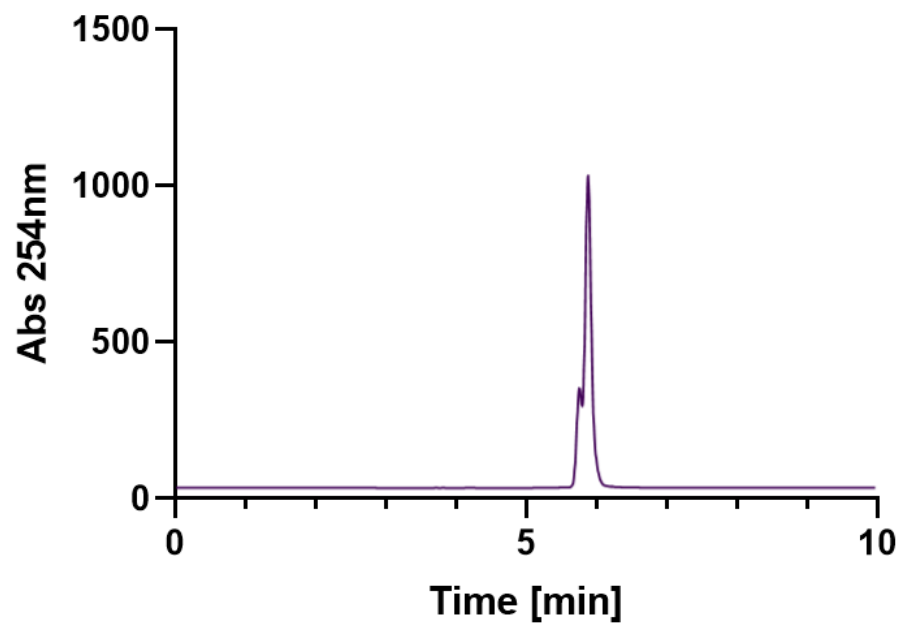

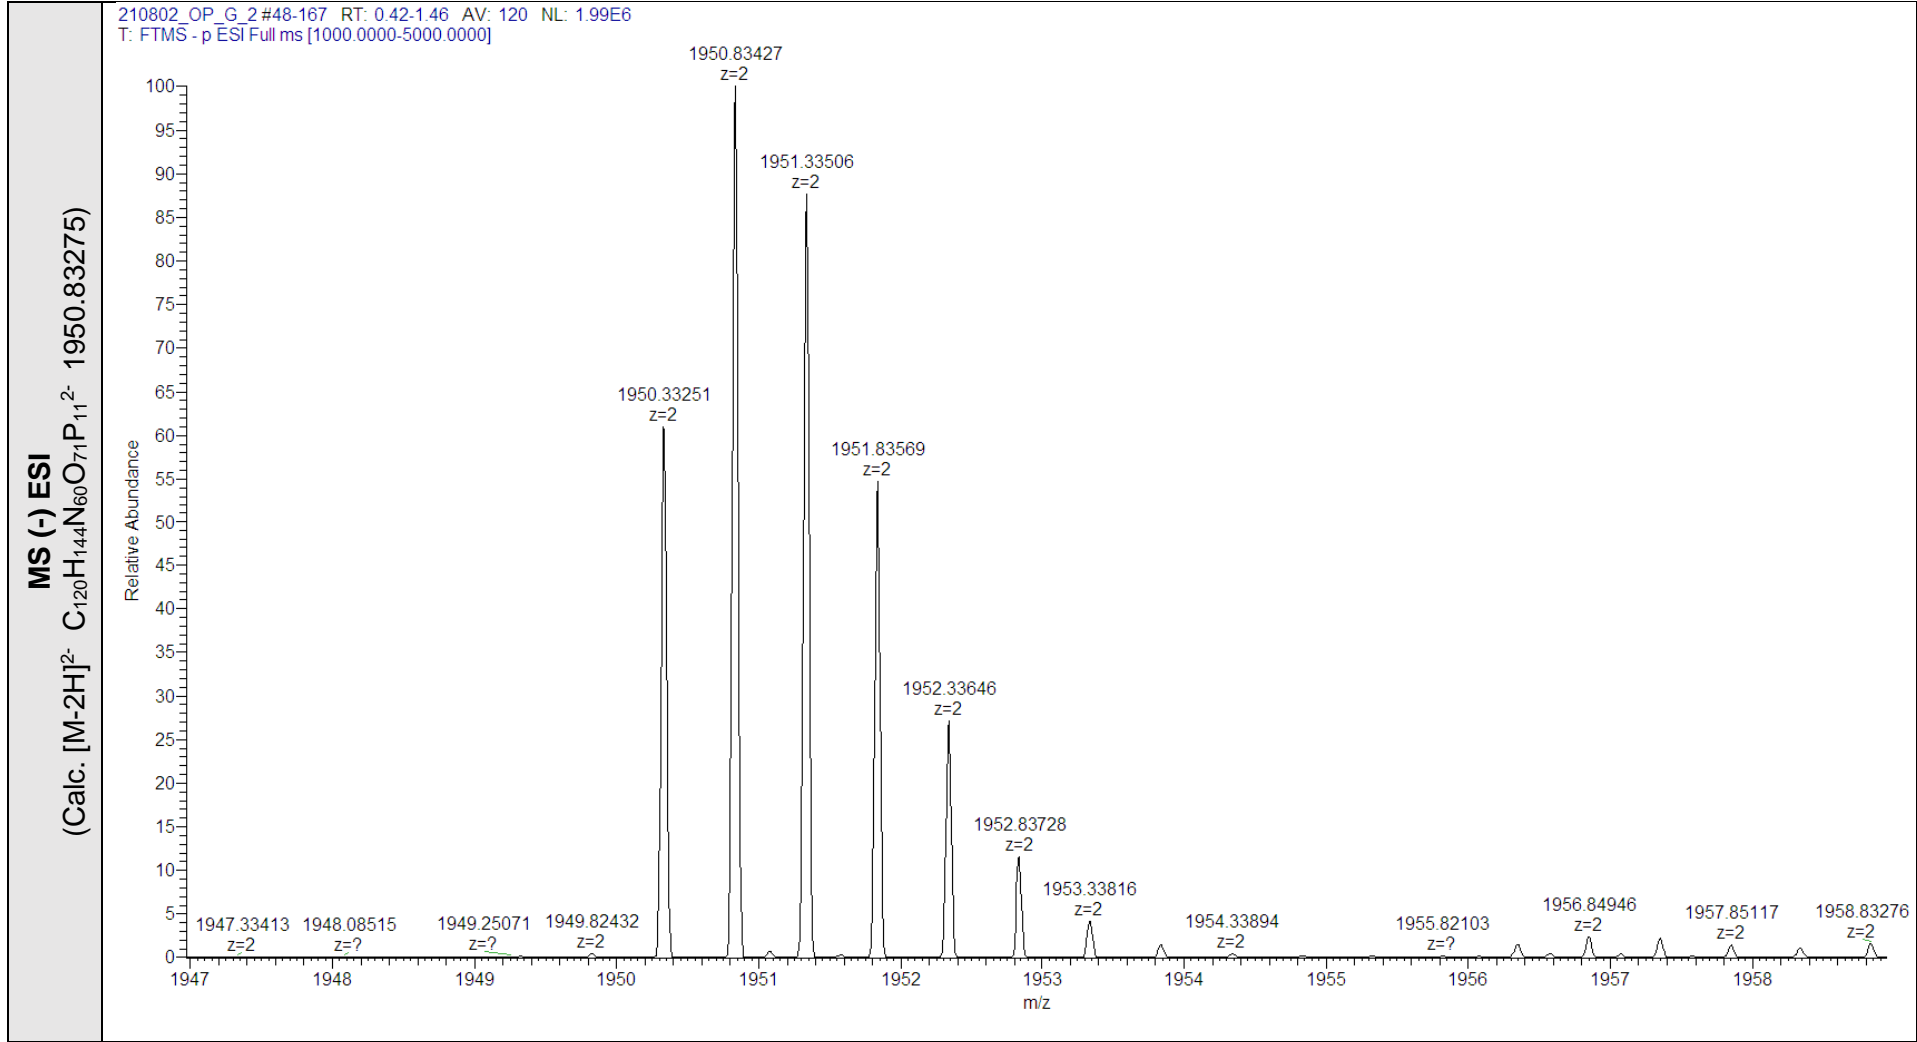

**A<sub>5</sub>GA<sub>6</sub> (G2)**

Chemical structure

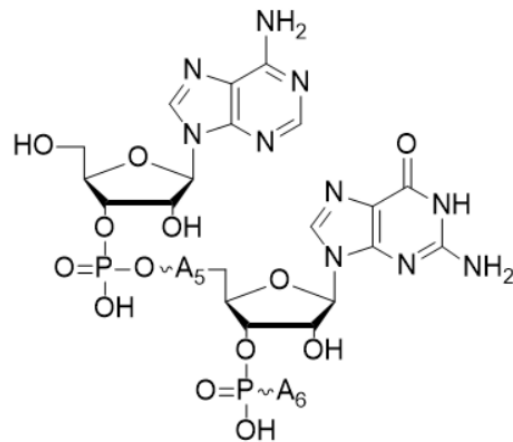

RP HPLC

**A<sub>5</sub>GA<sub>6</sub>**

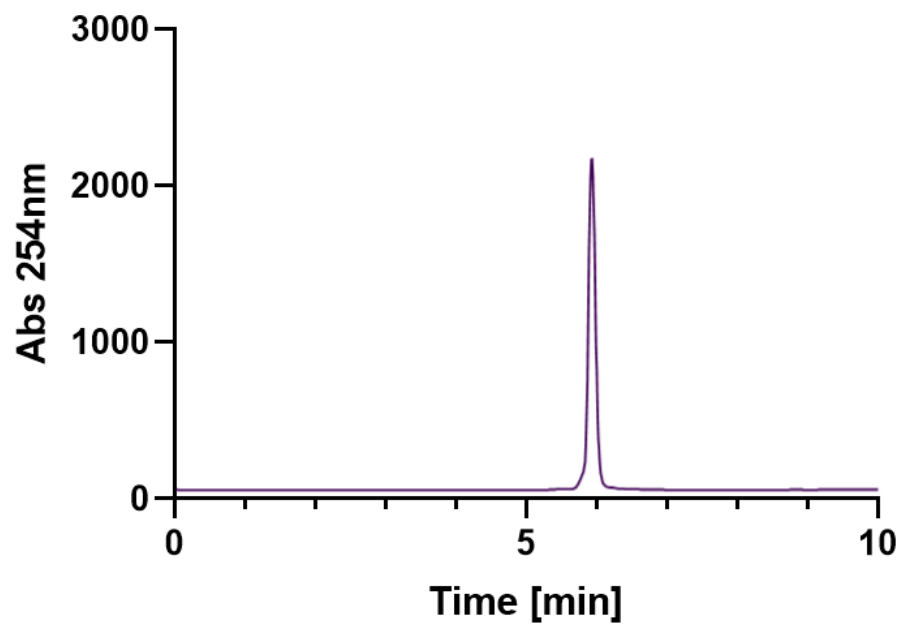

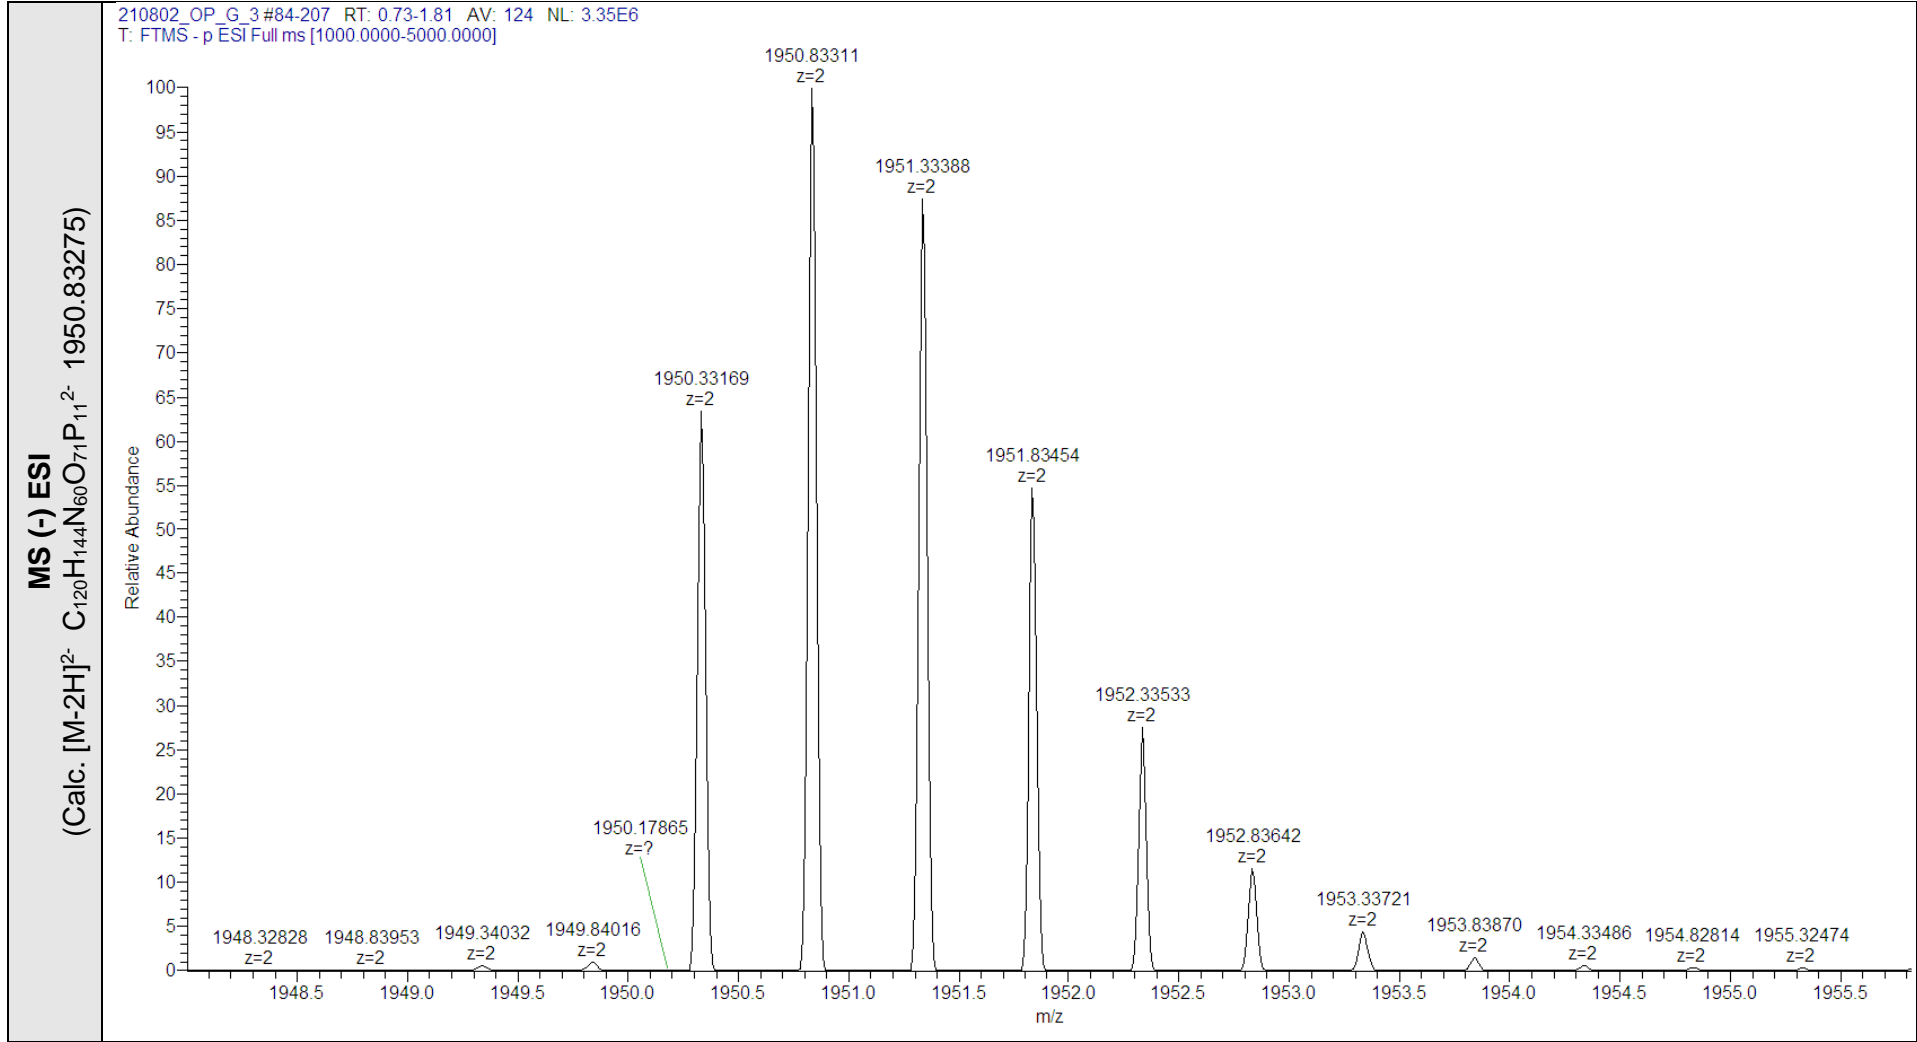



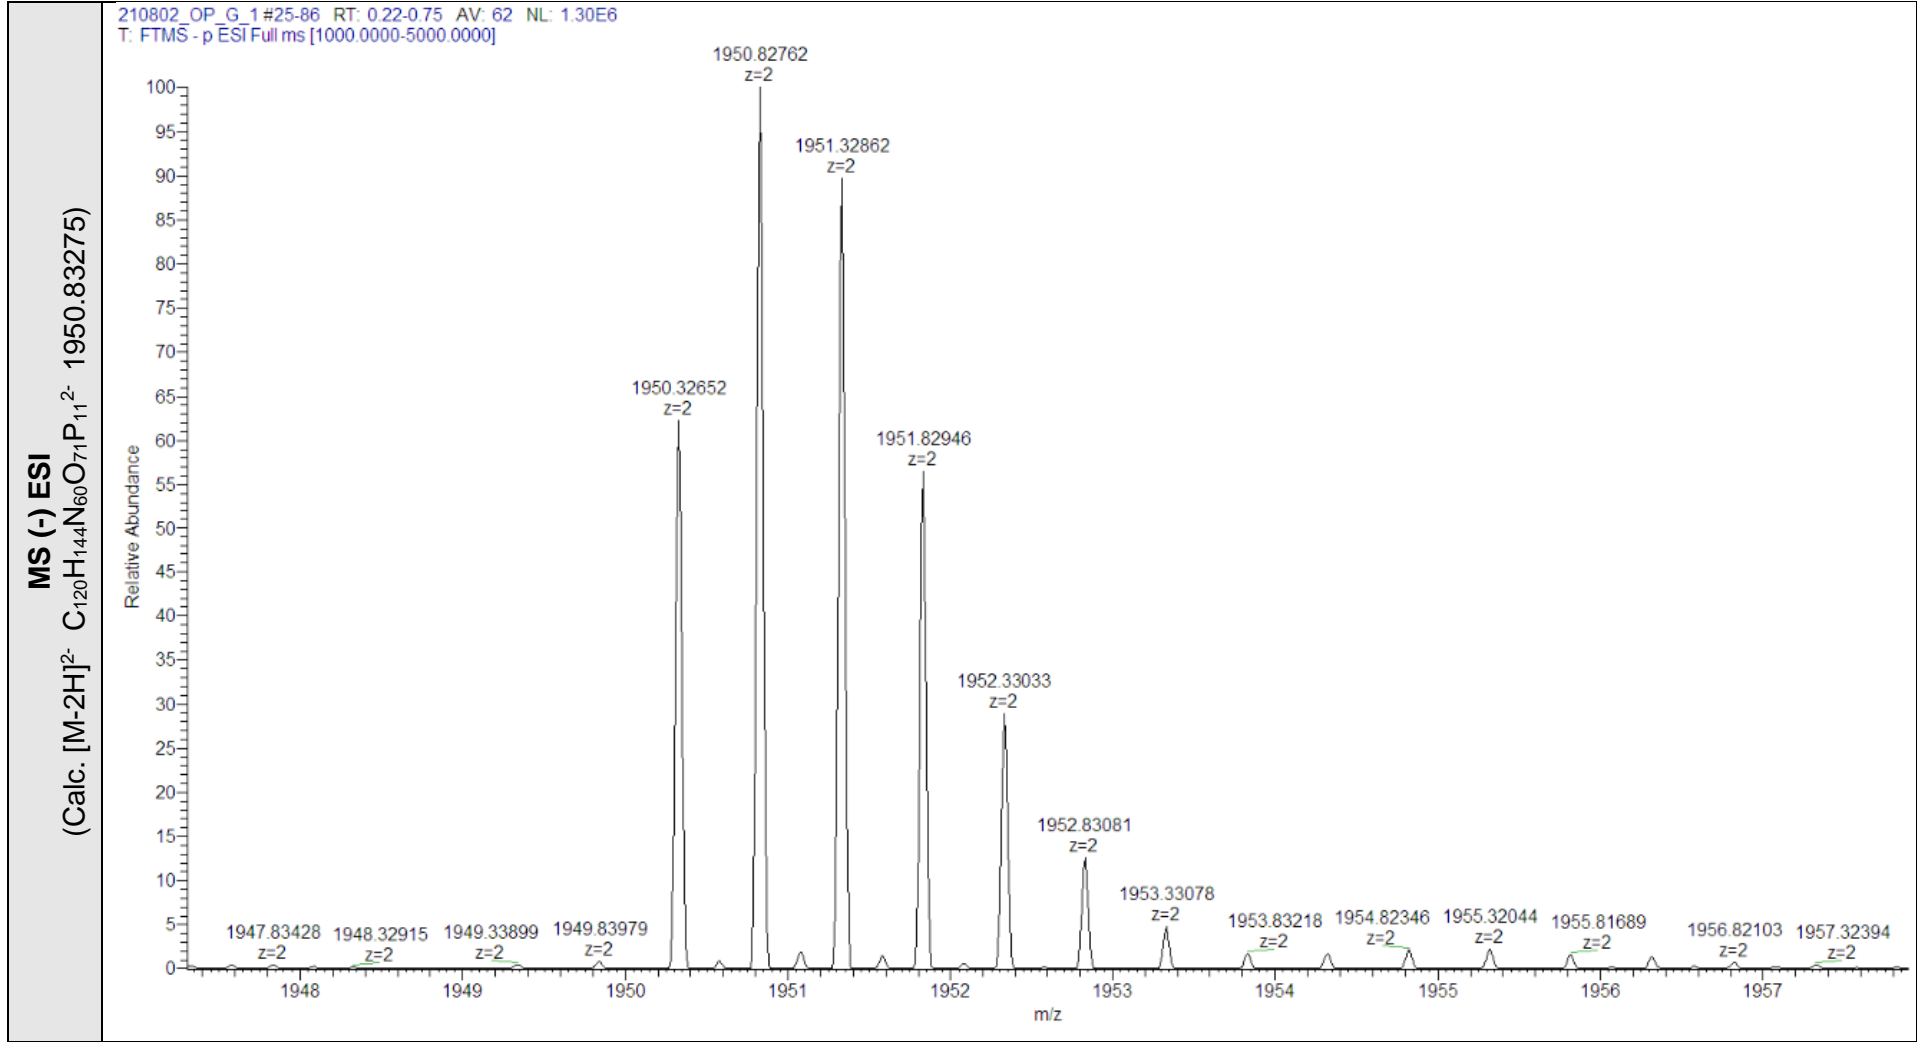

**A<sub>10</sub>A<sub>F</sub>A (A<sub>F1</sub>)**

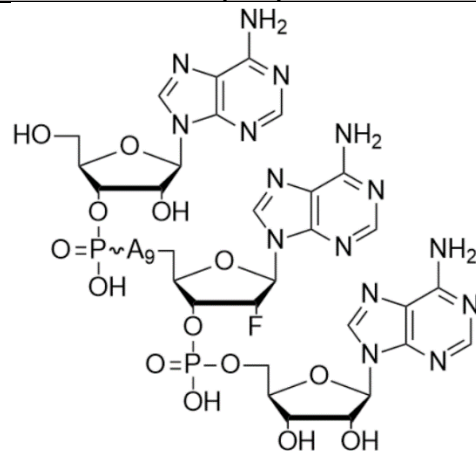

**A<sub>10</sub>A<sub>F</sub>A**

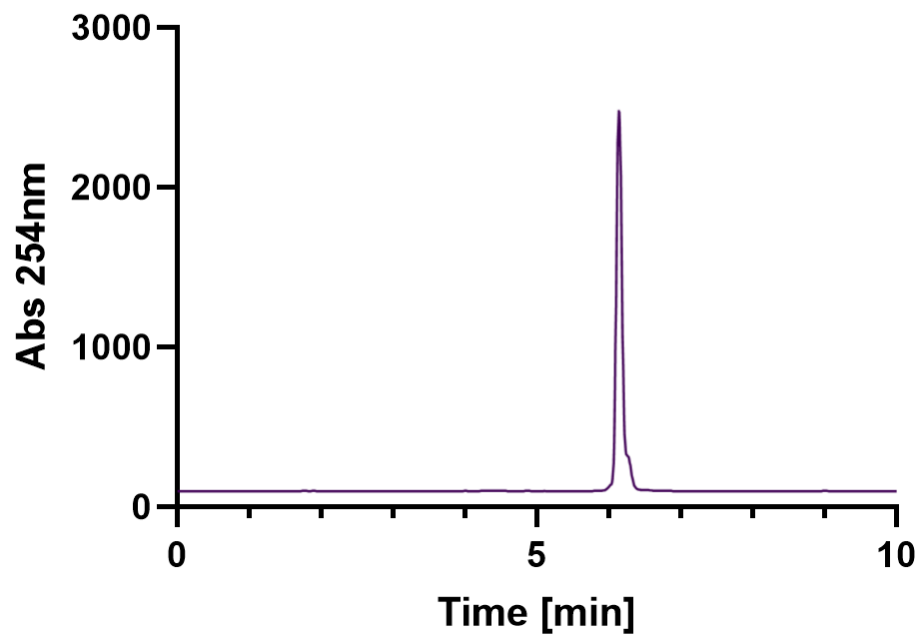

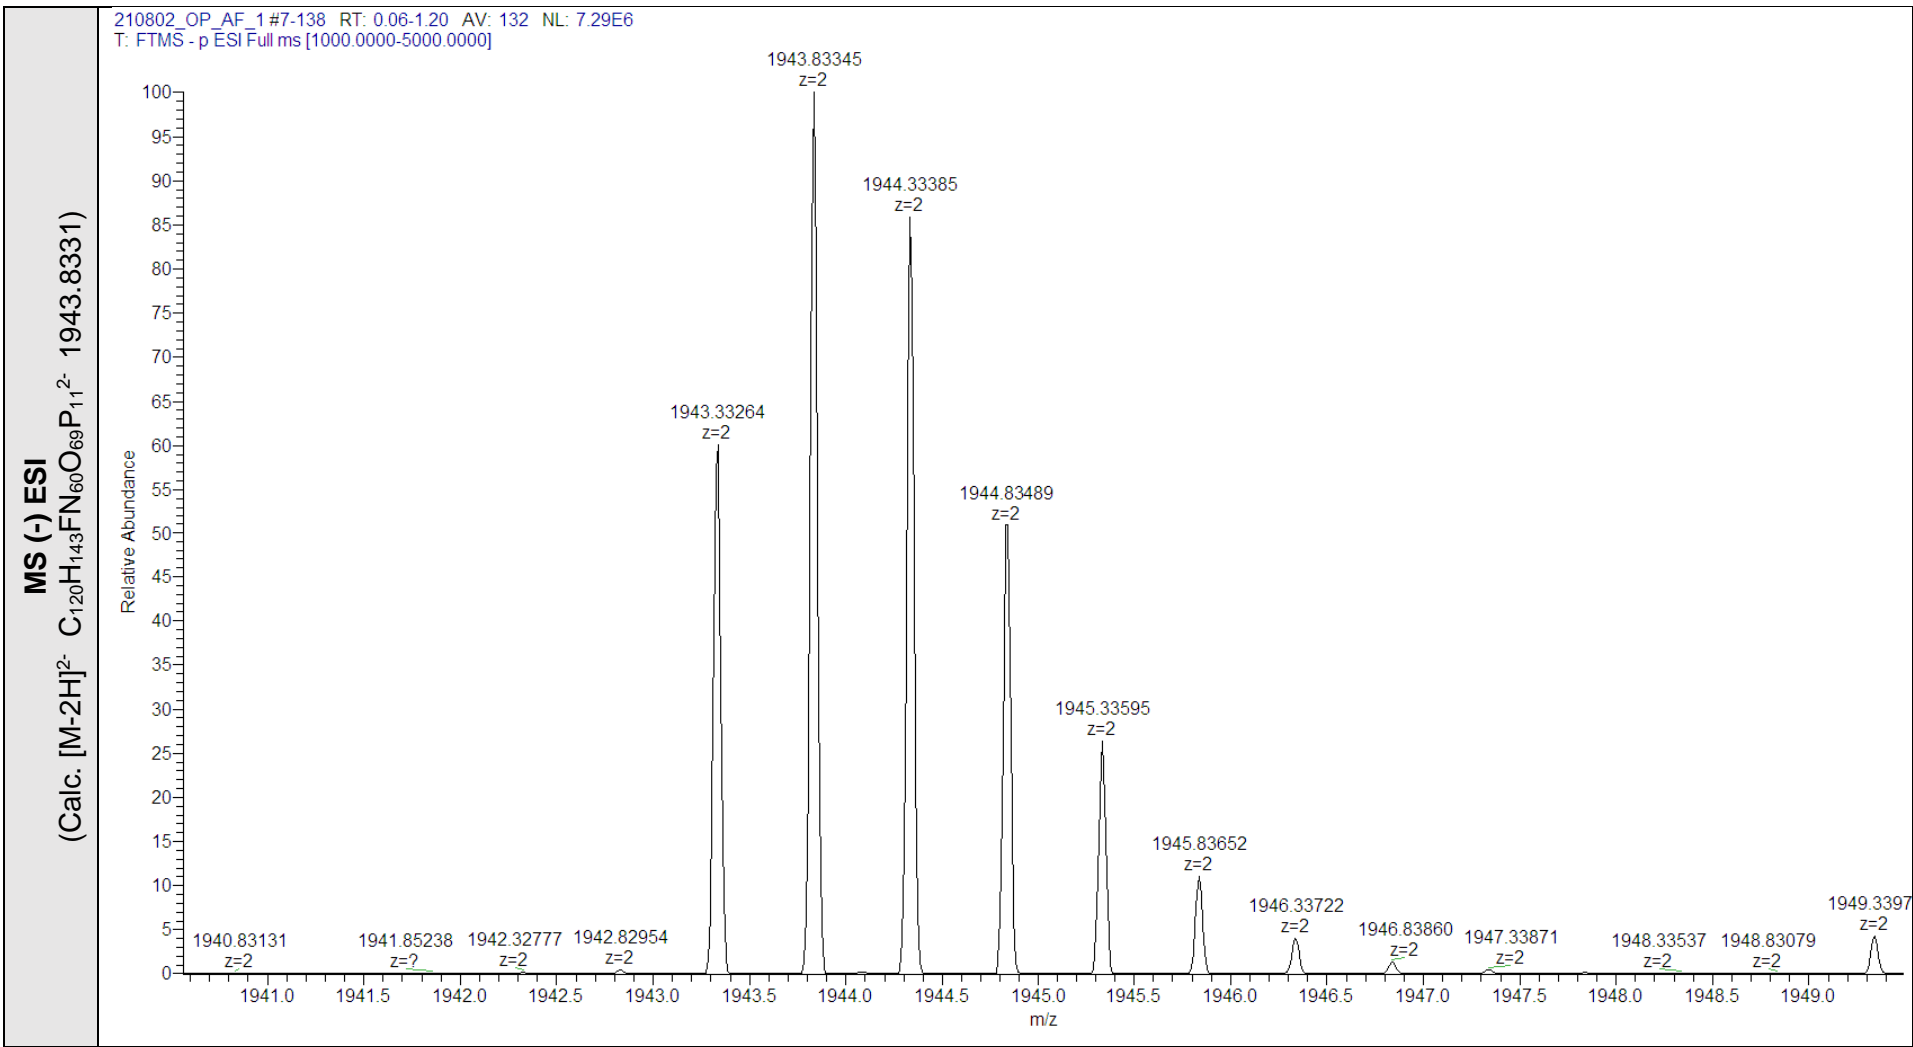



**A<sub>5</sub>A<sub>F</sub>A<sub>6</sub> (AF2)**

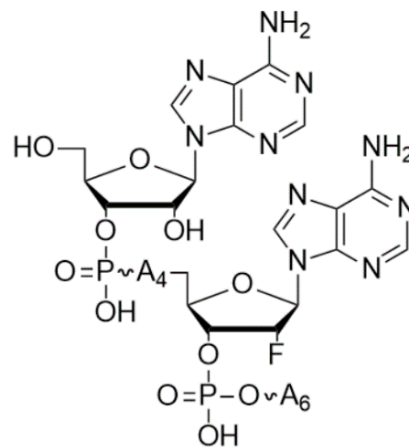

Chemical structure

RP HPLC

**A<sub>5</sub>A<sub>F</sub>A<sub>6</sub>**

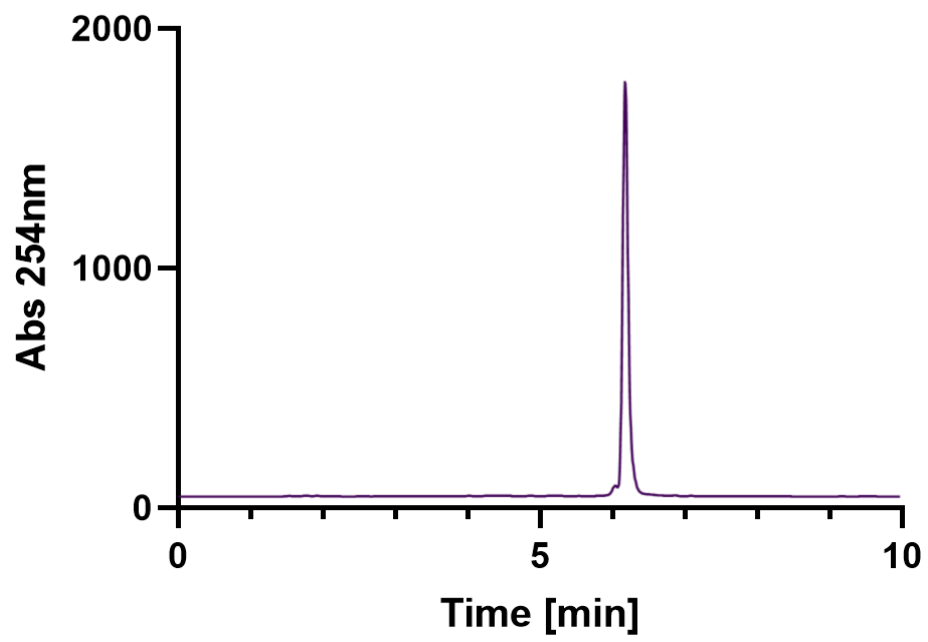

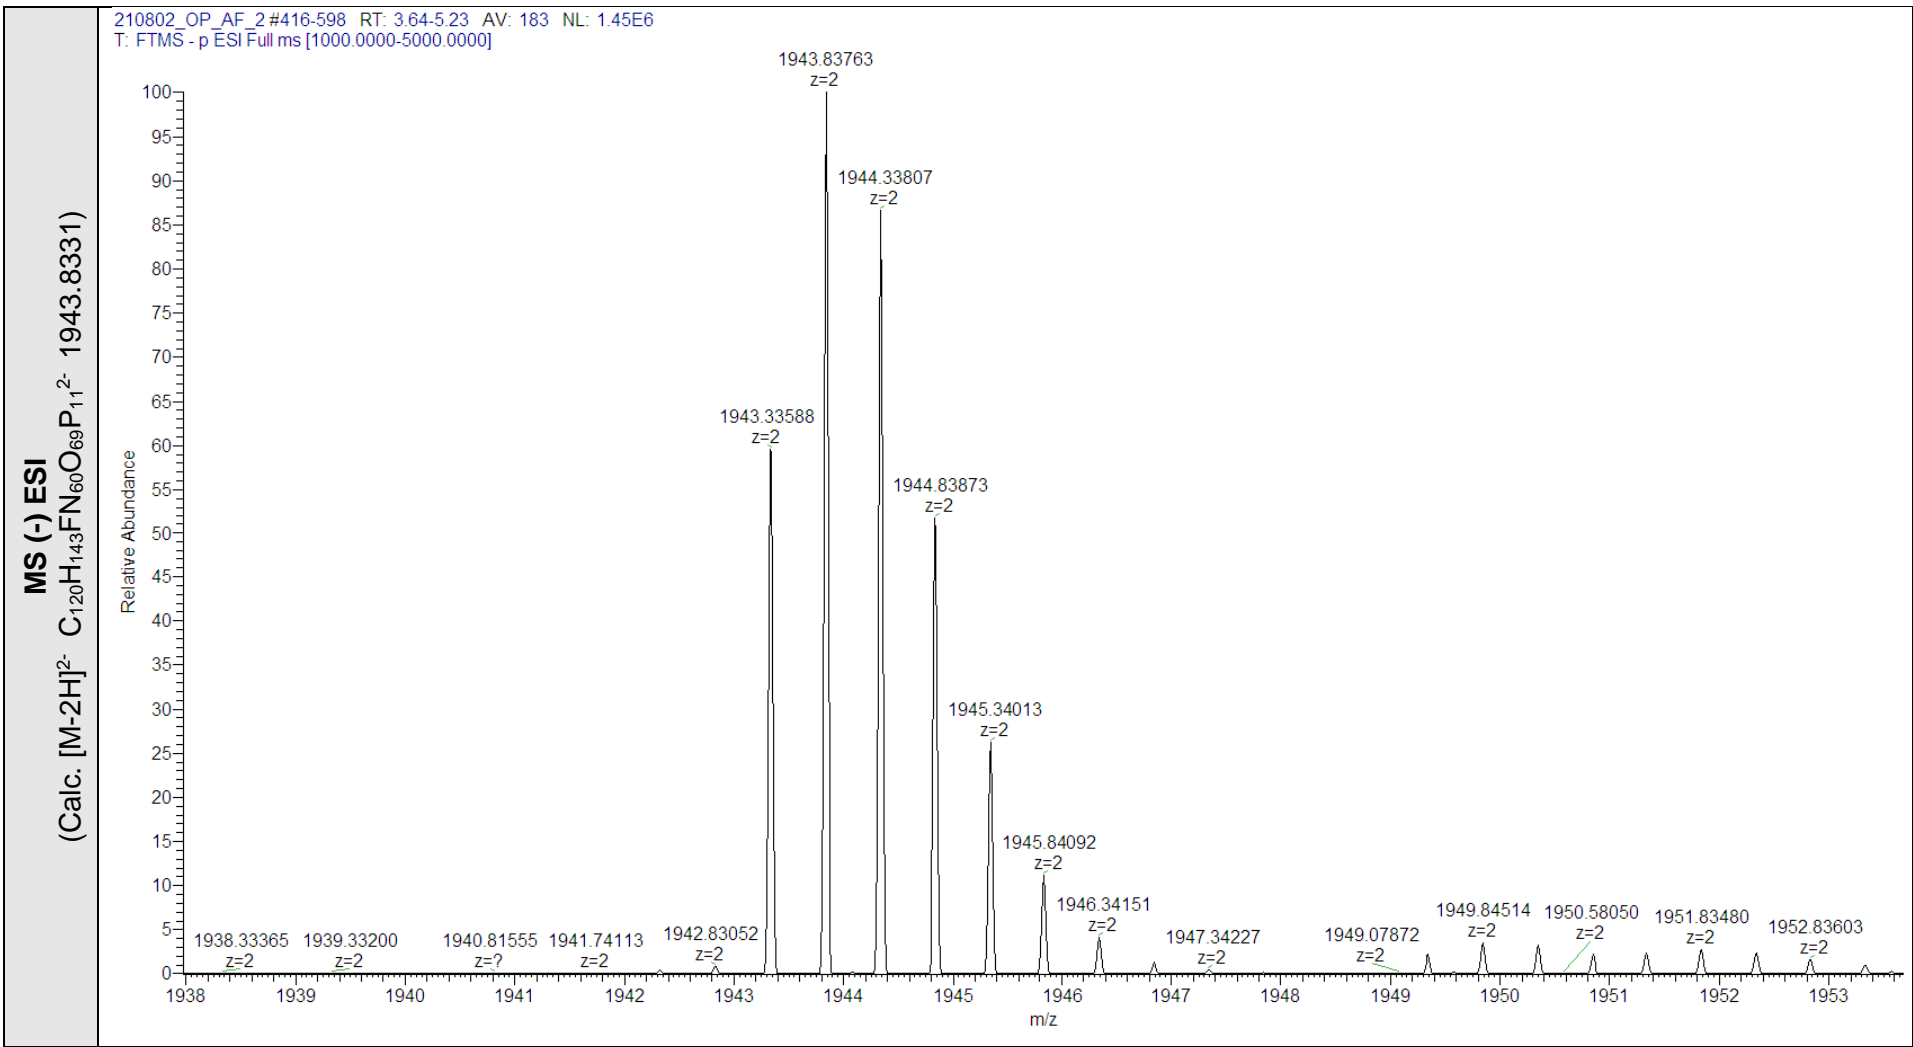

A<sub>F</sub>A<sub>11</sub> (A<sub>F</sub>3)

Chemical structure

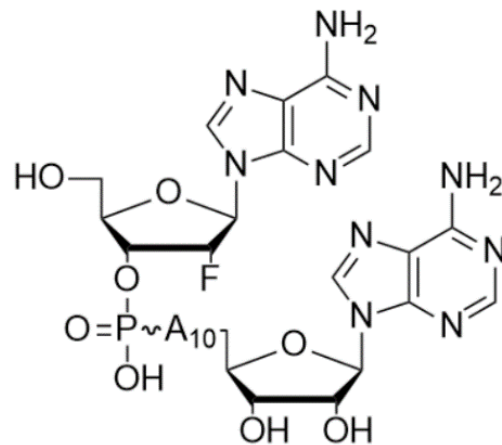

RP HPLC

A<sub>F</sub>A<sub>11</sub>

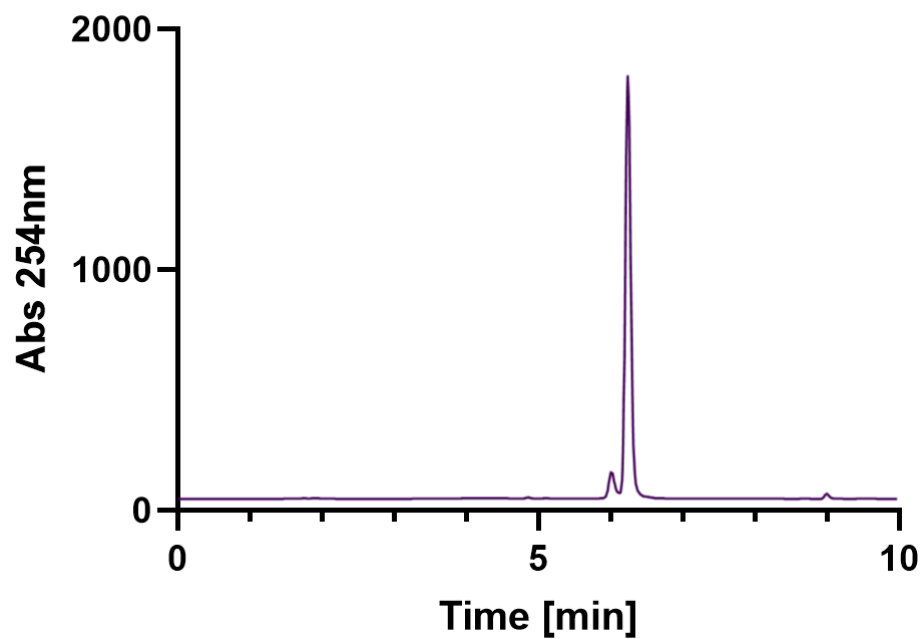

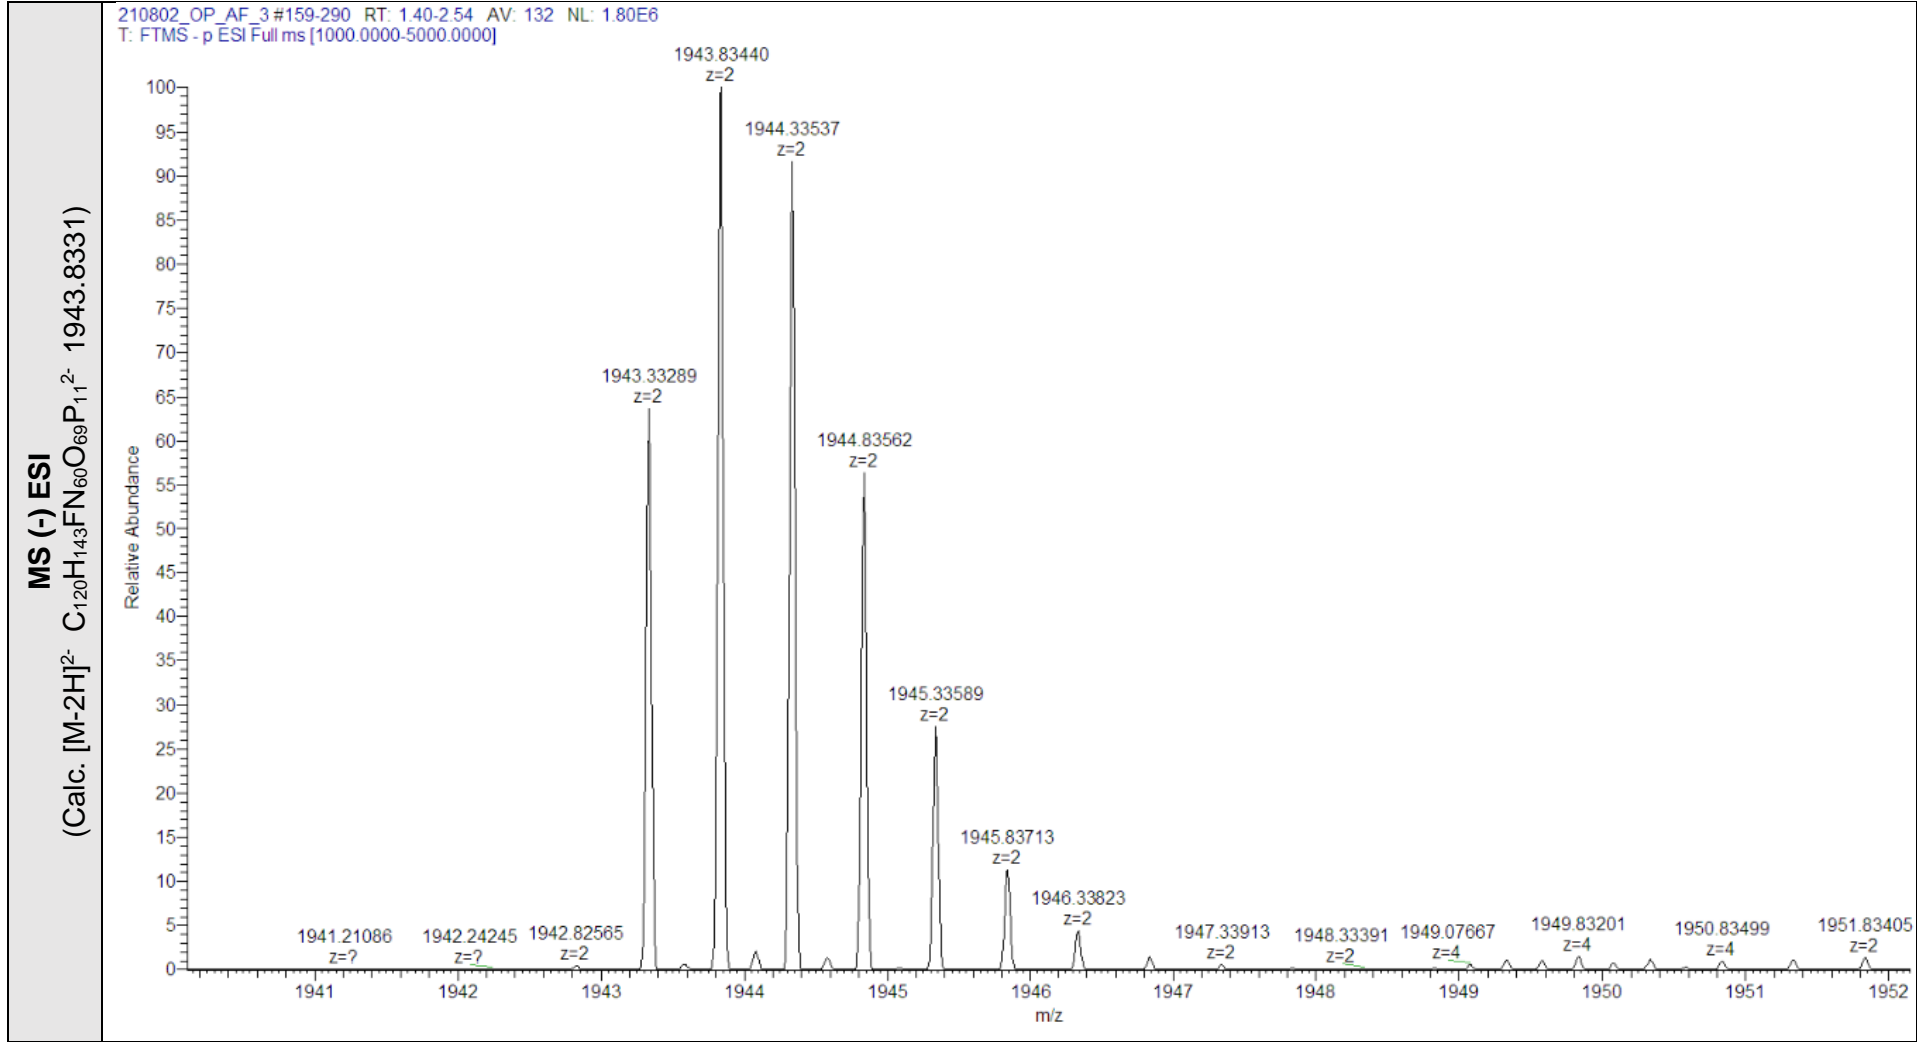

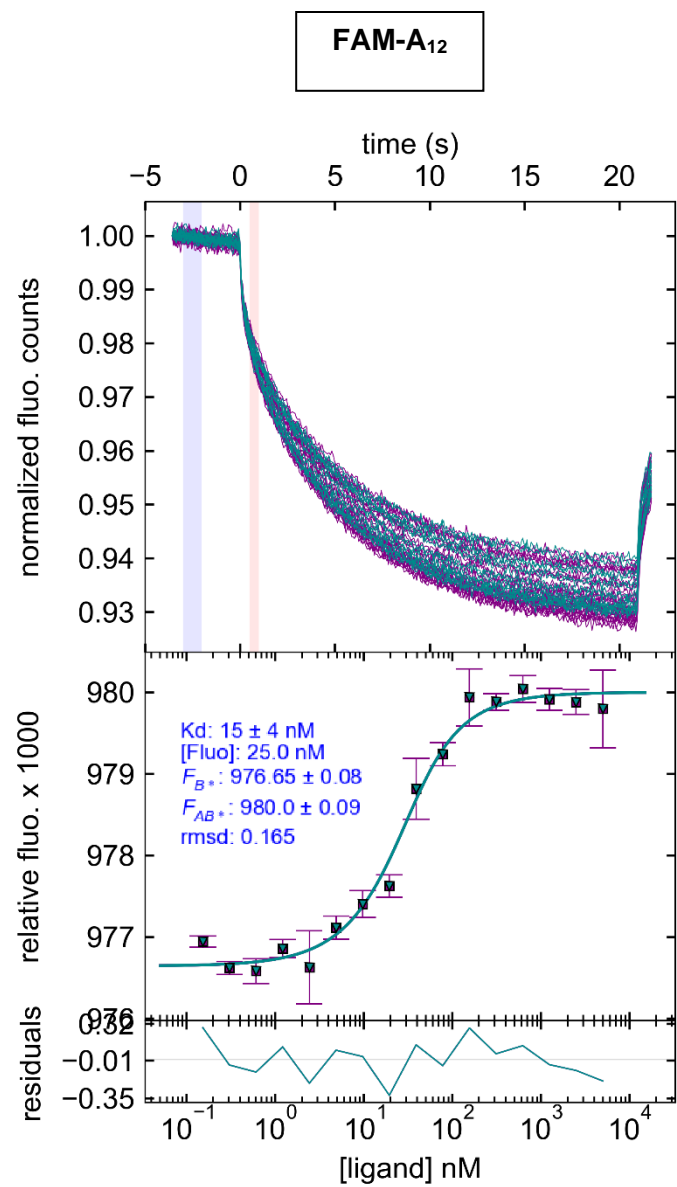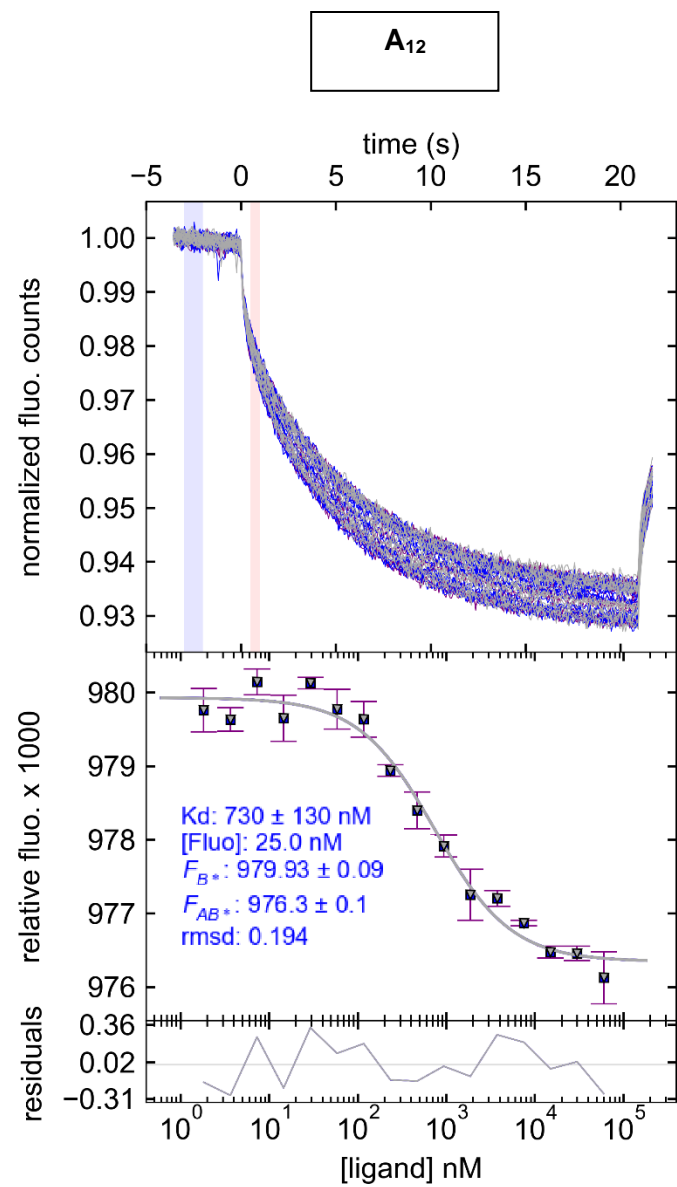

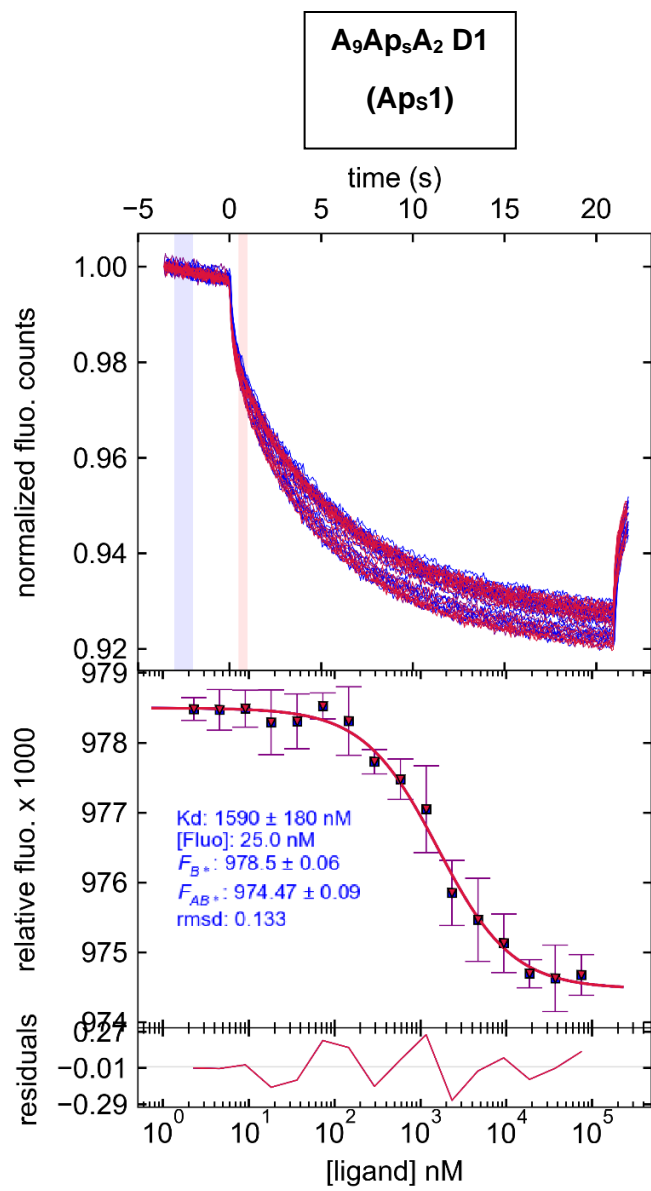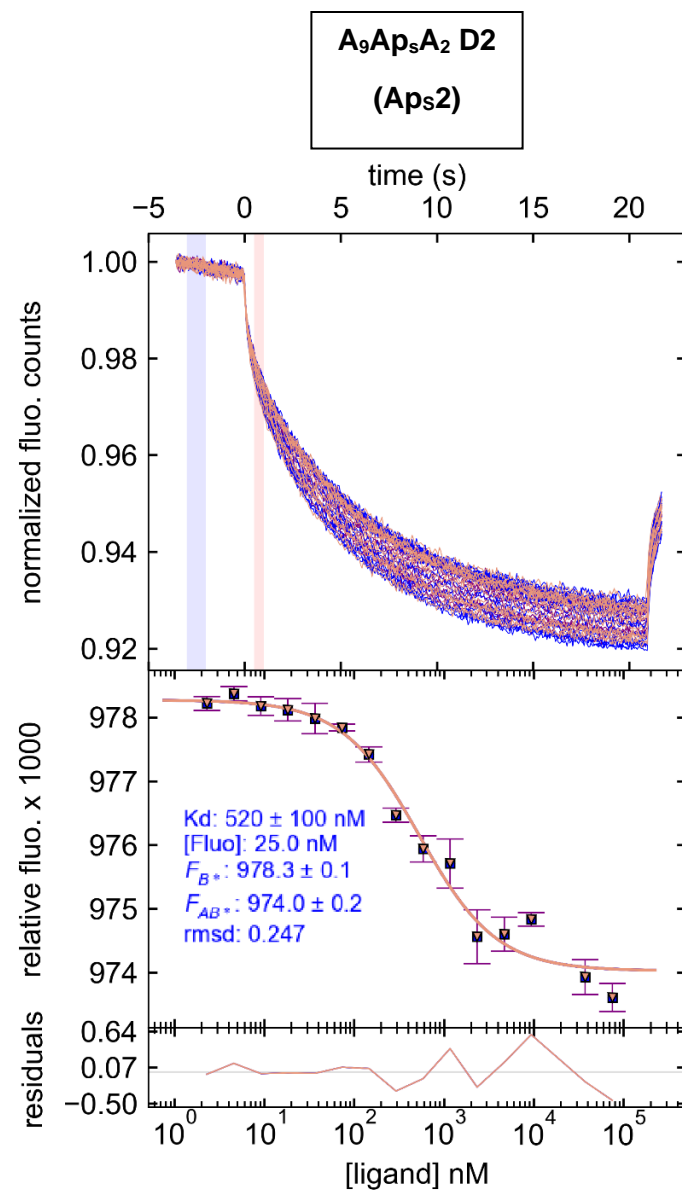

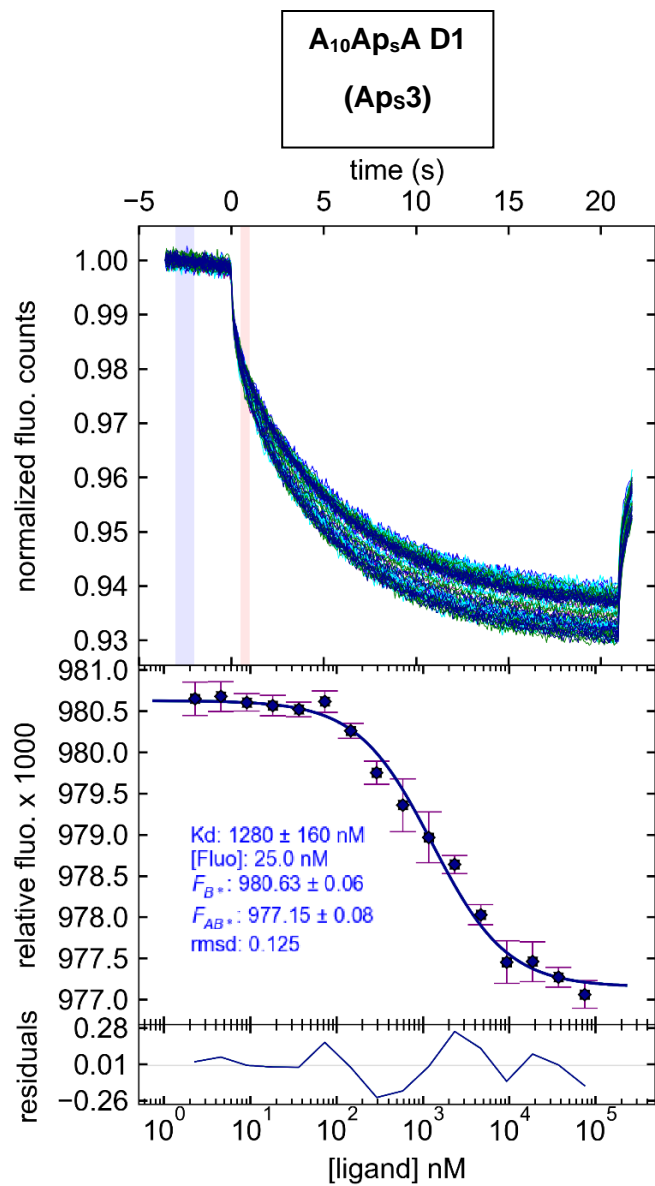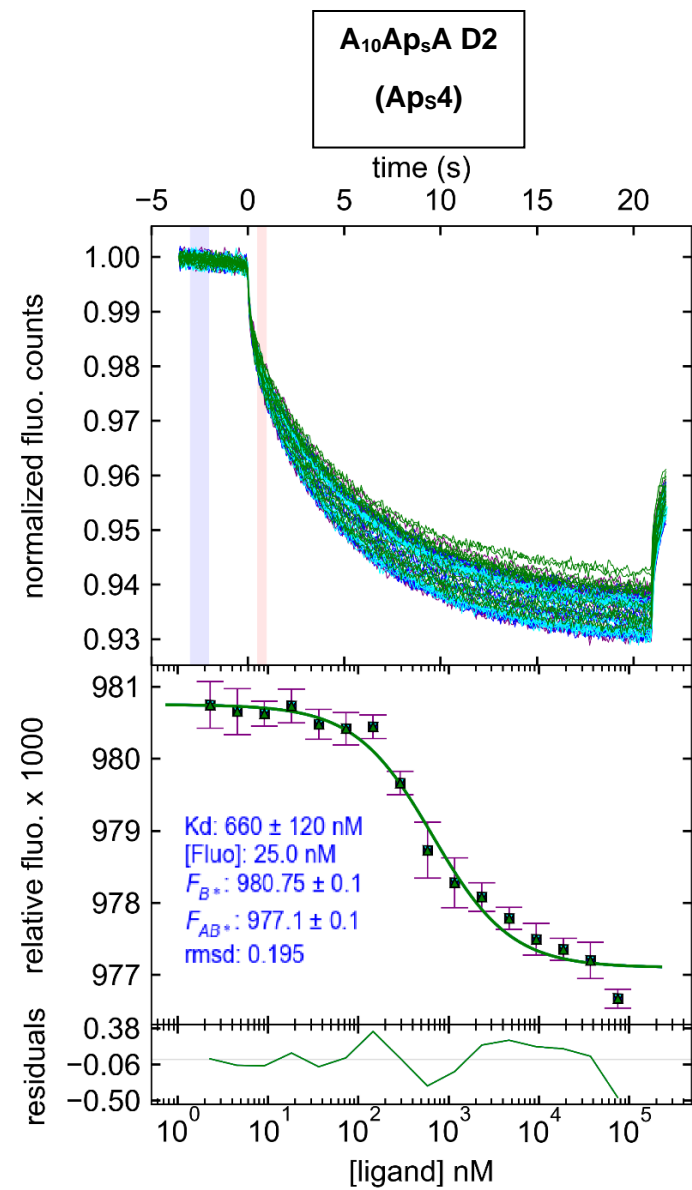

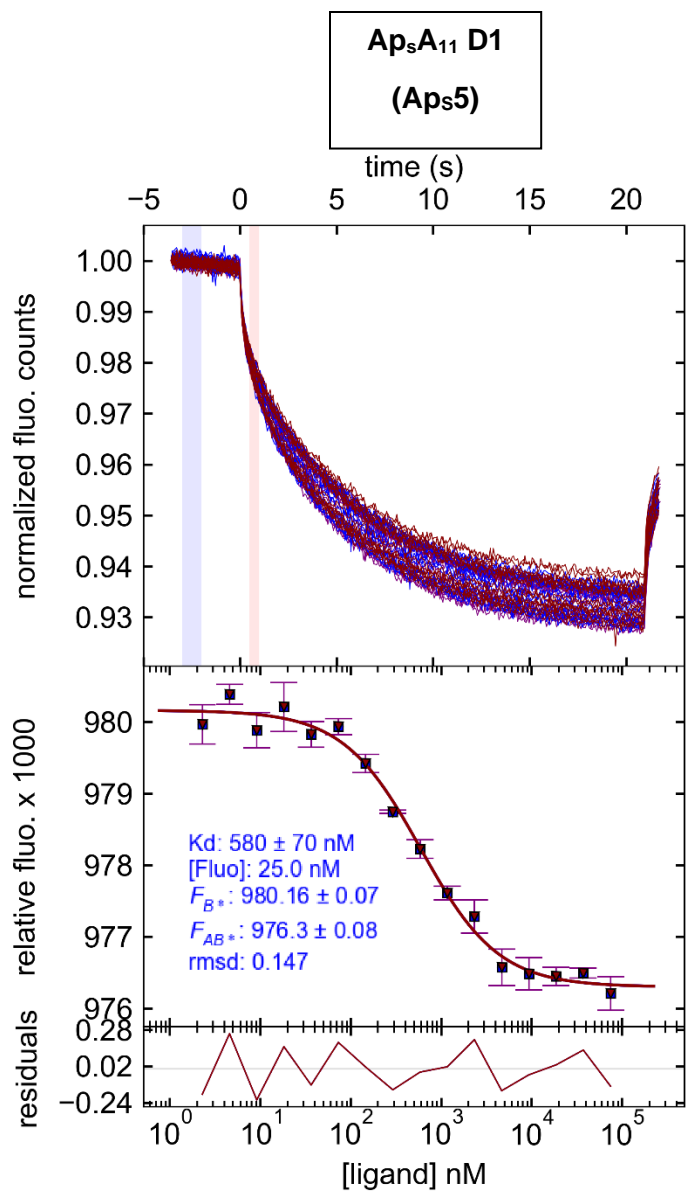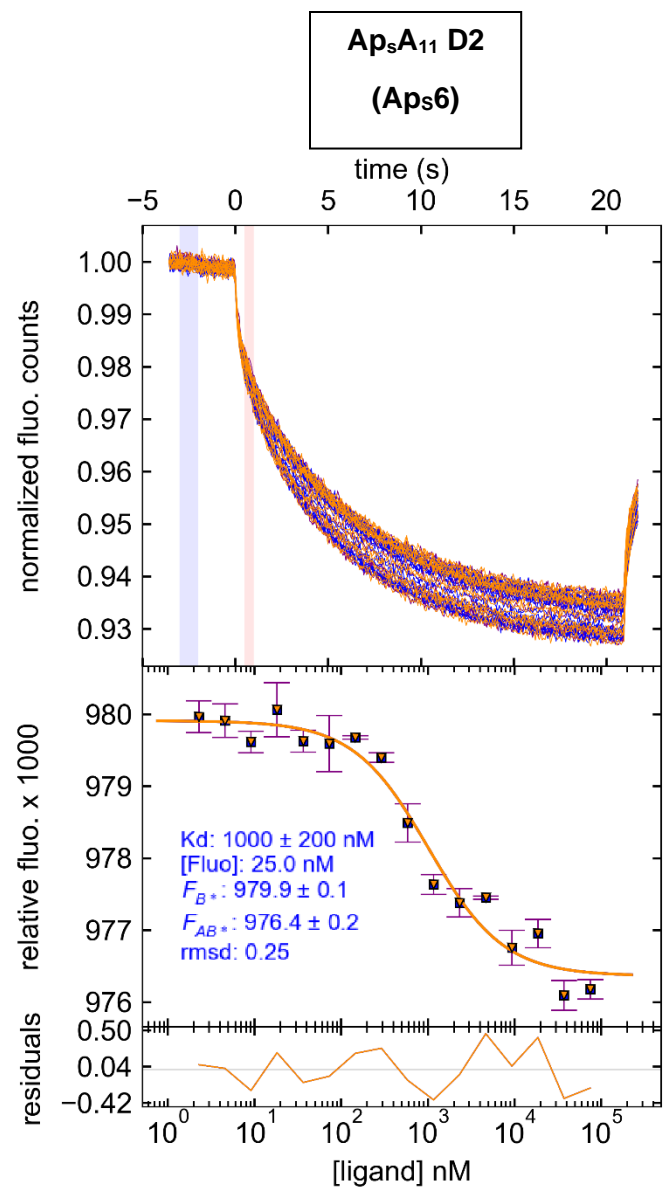



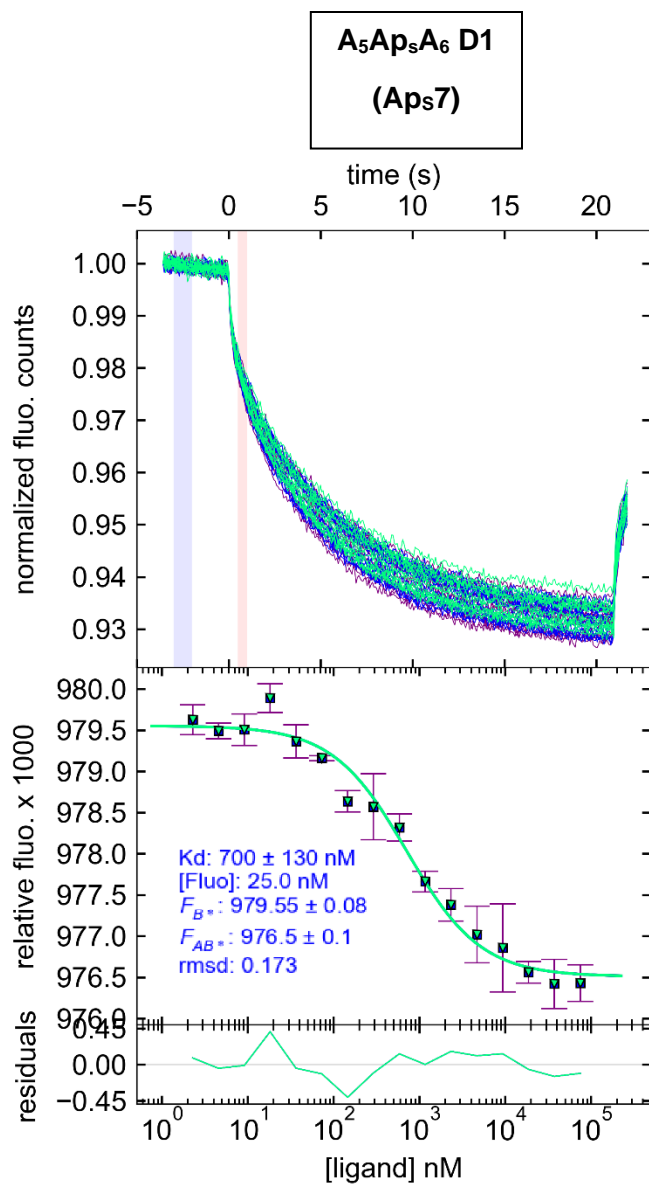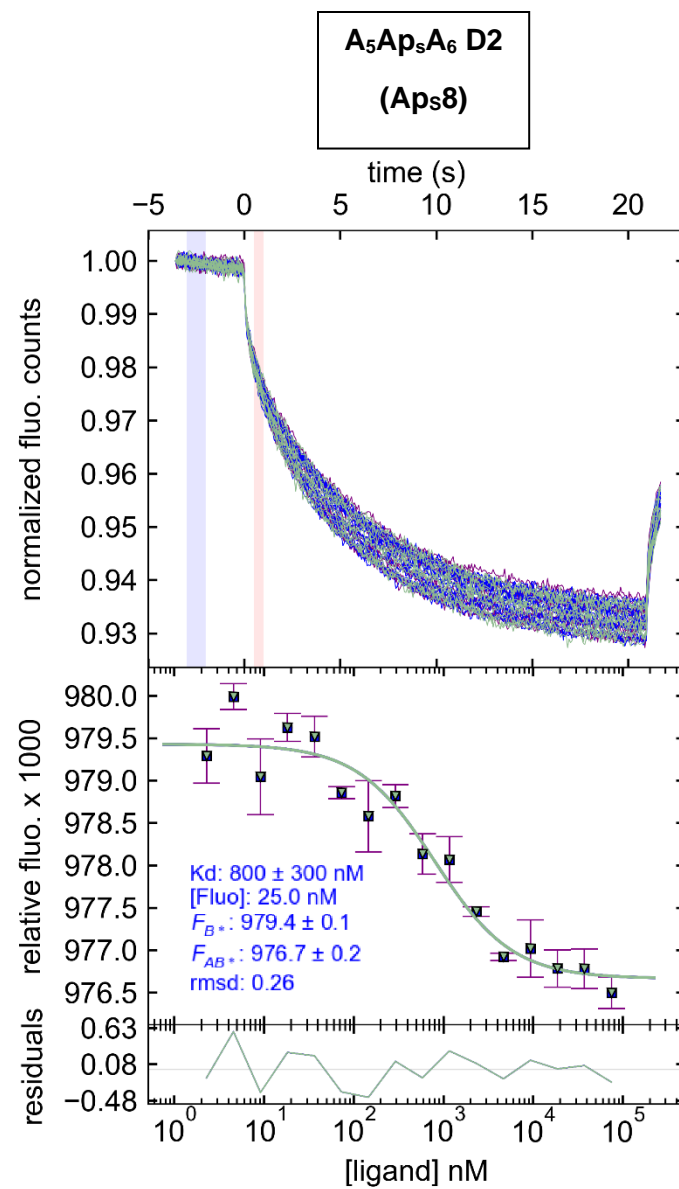

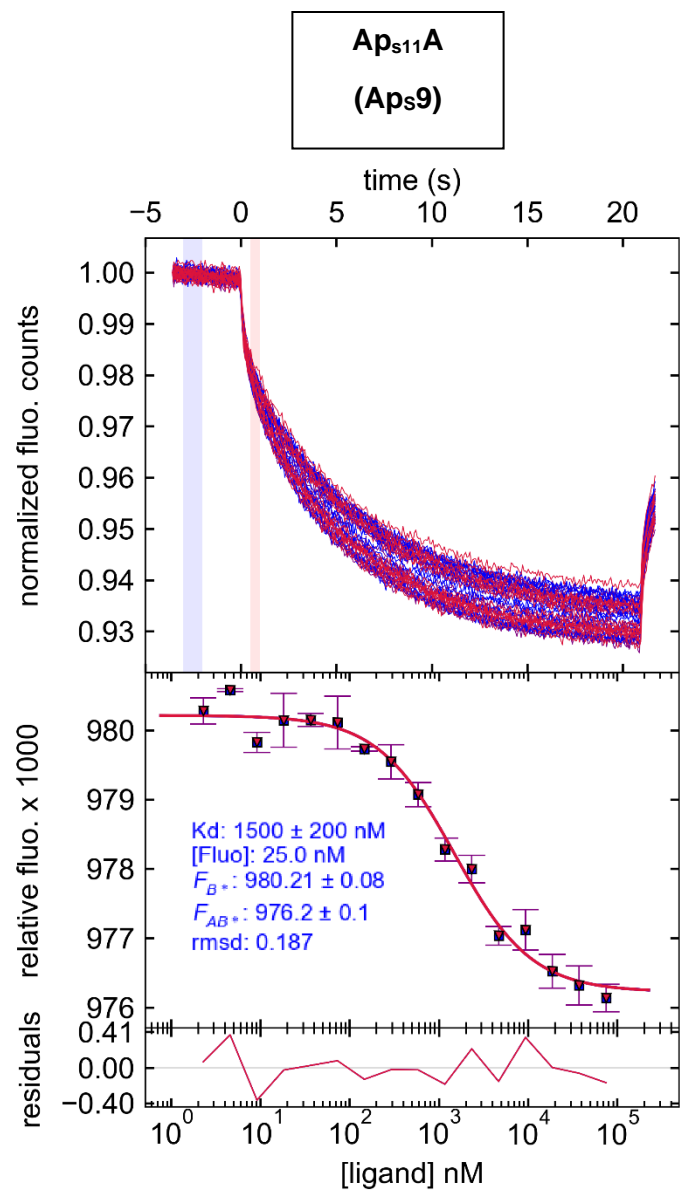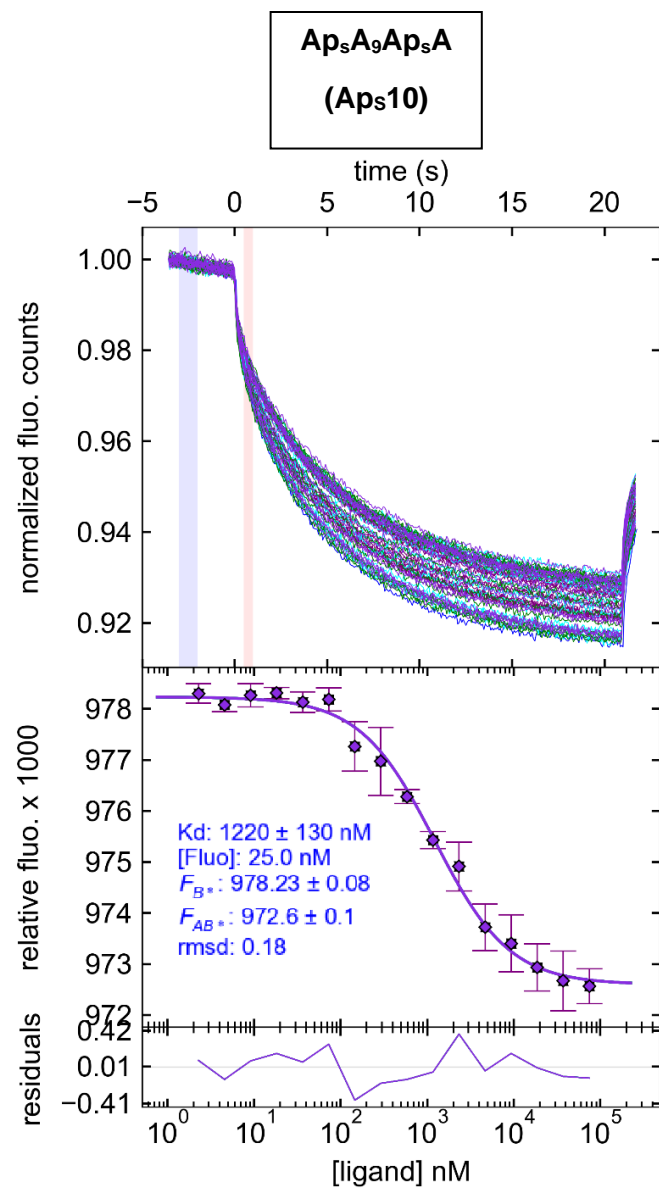

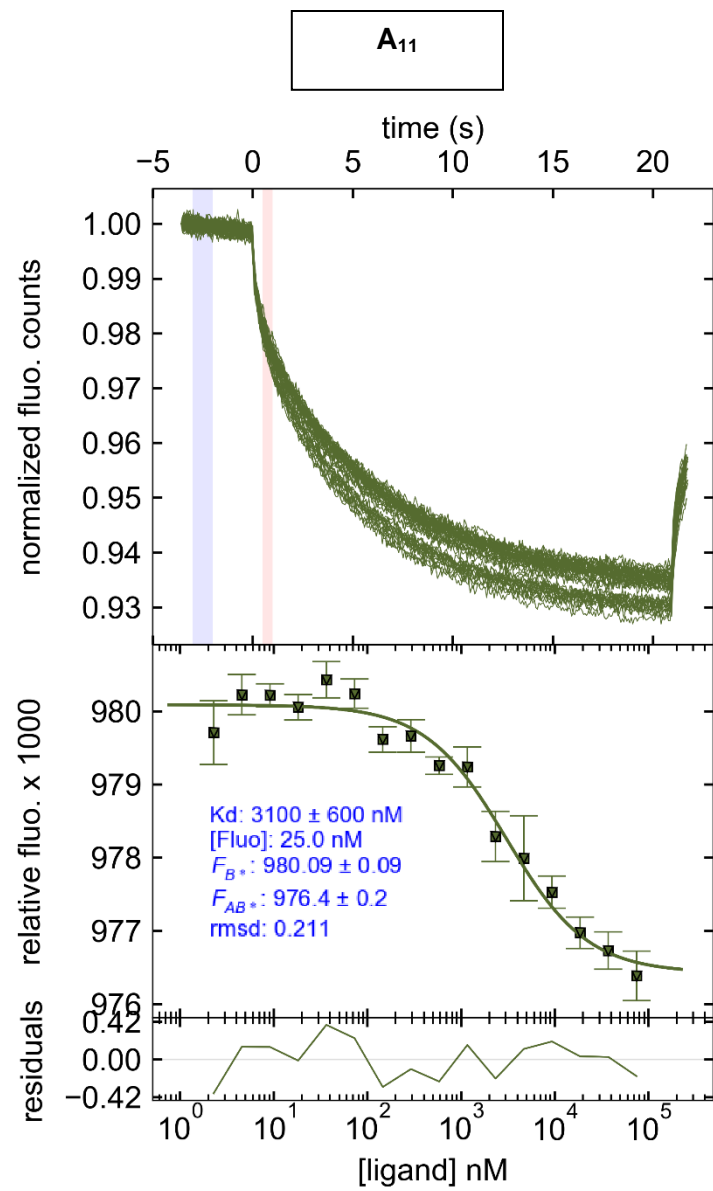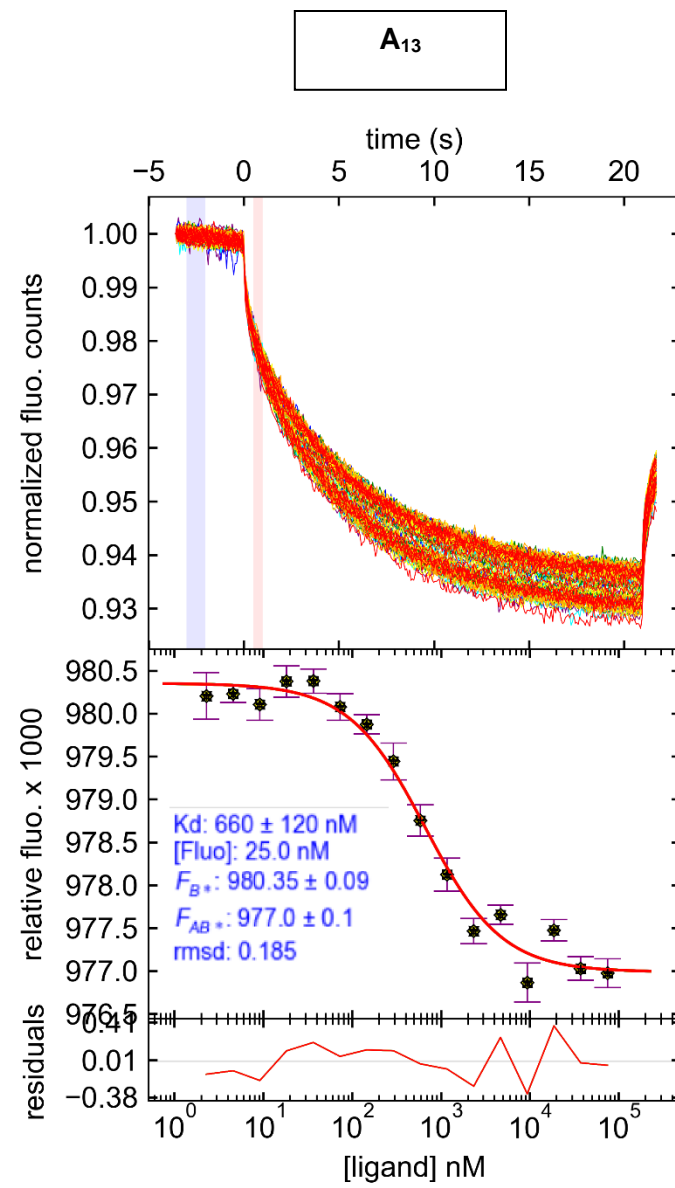

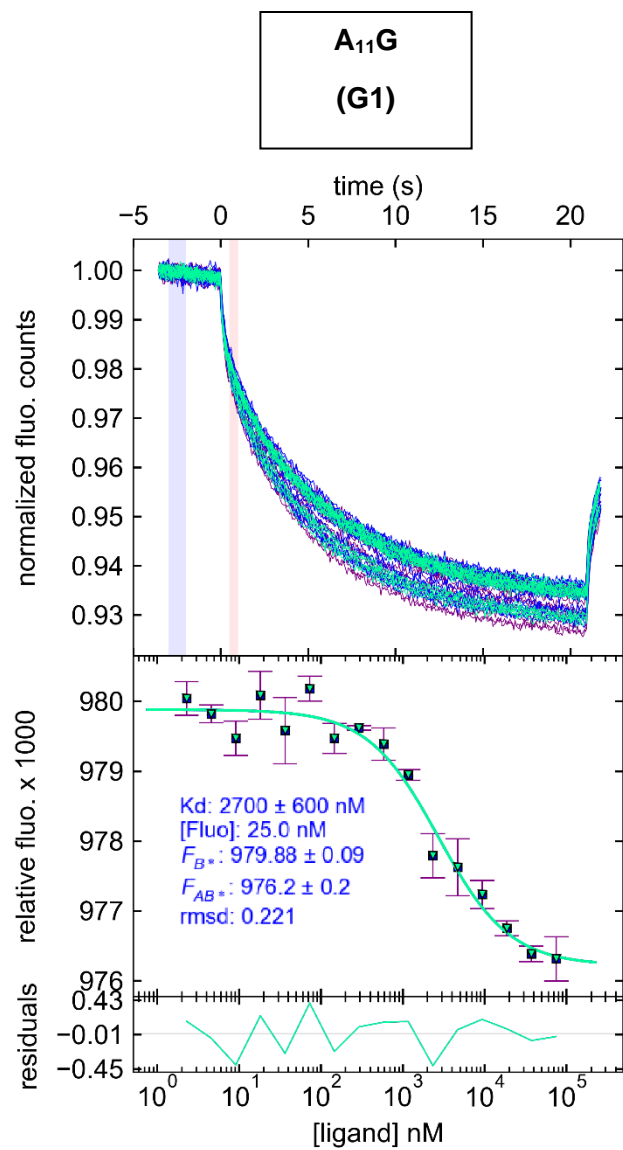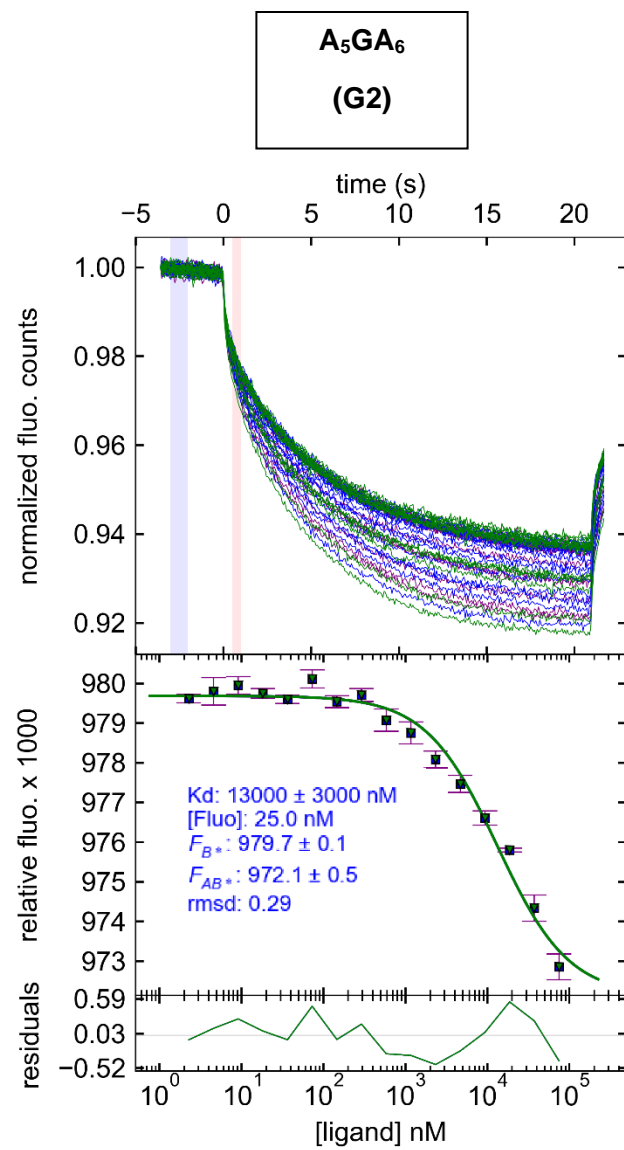

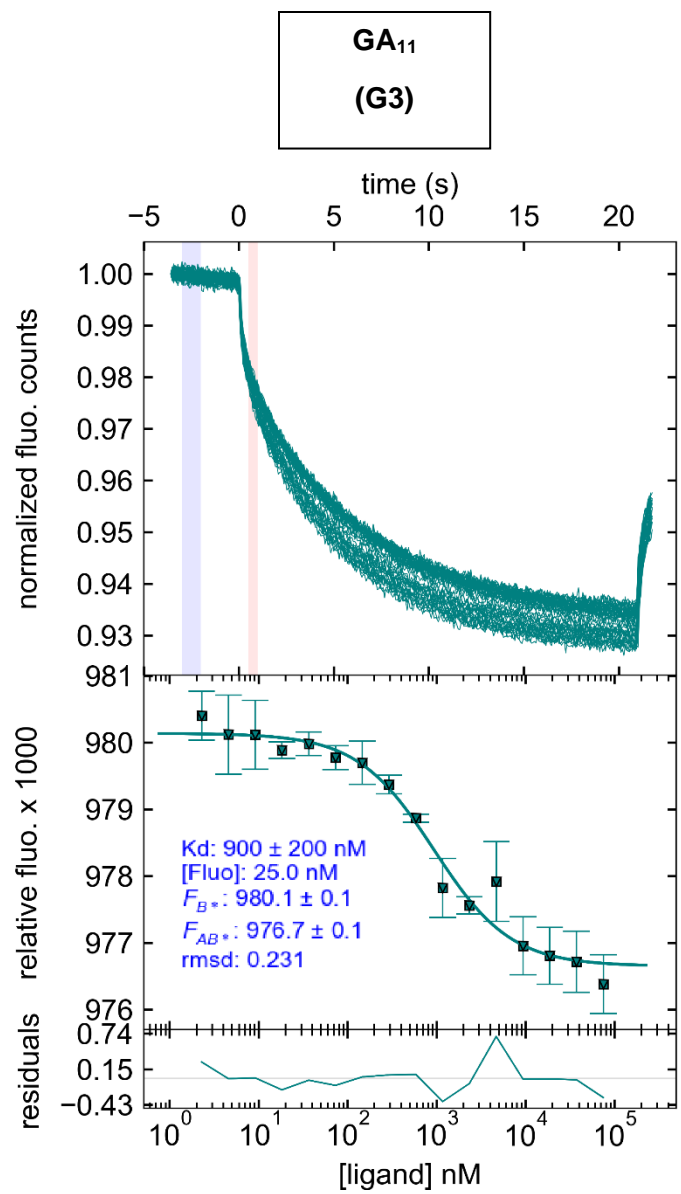

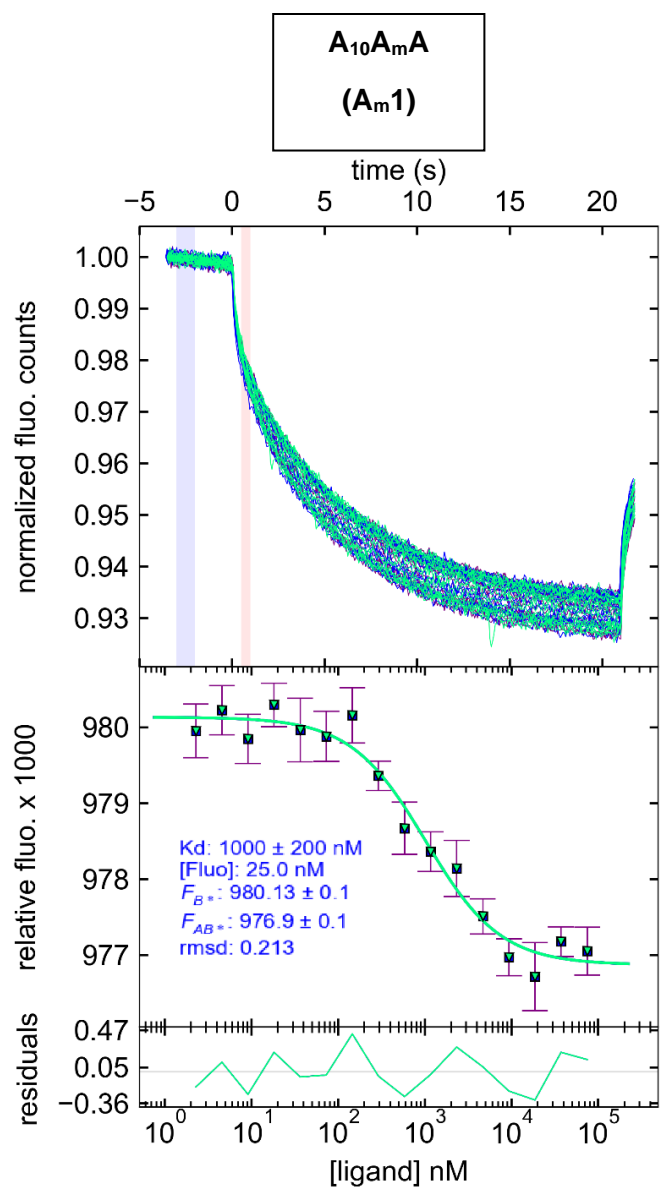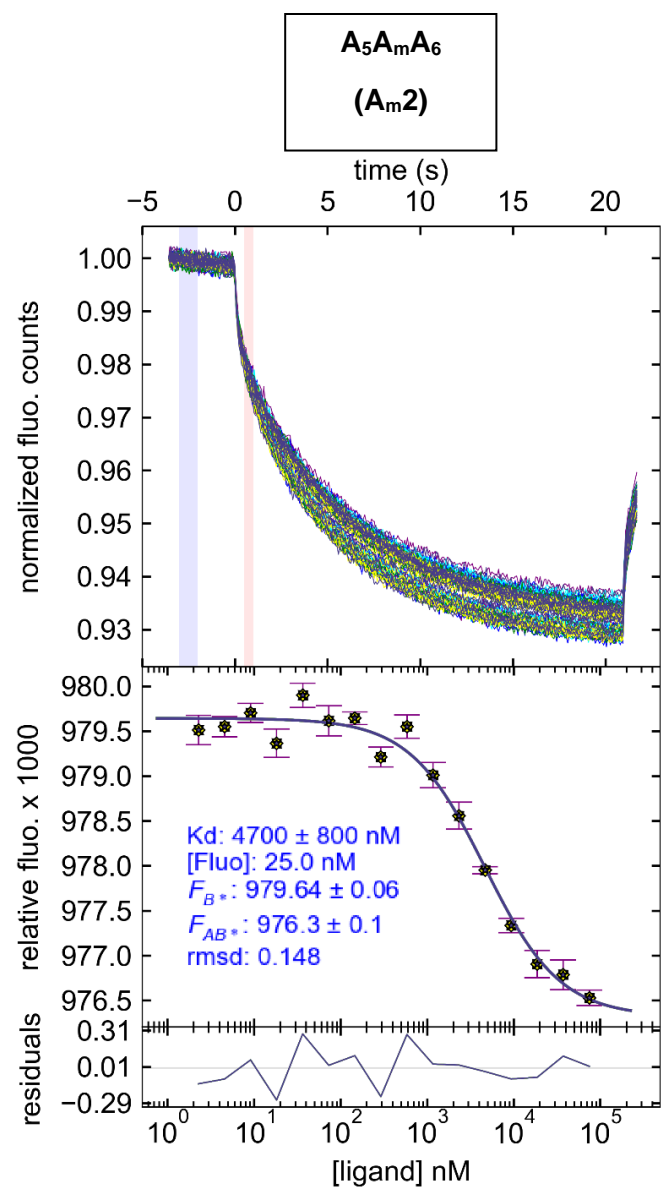

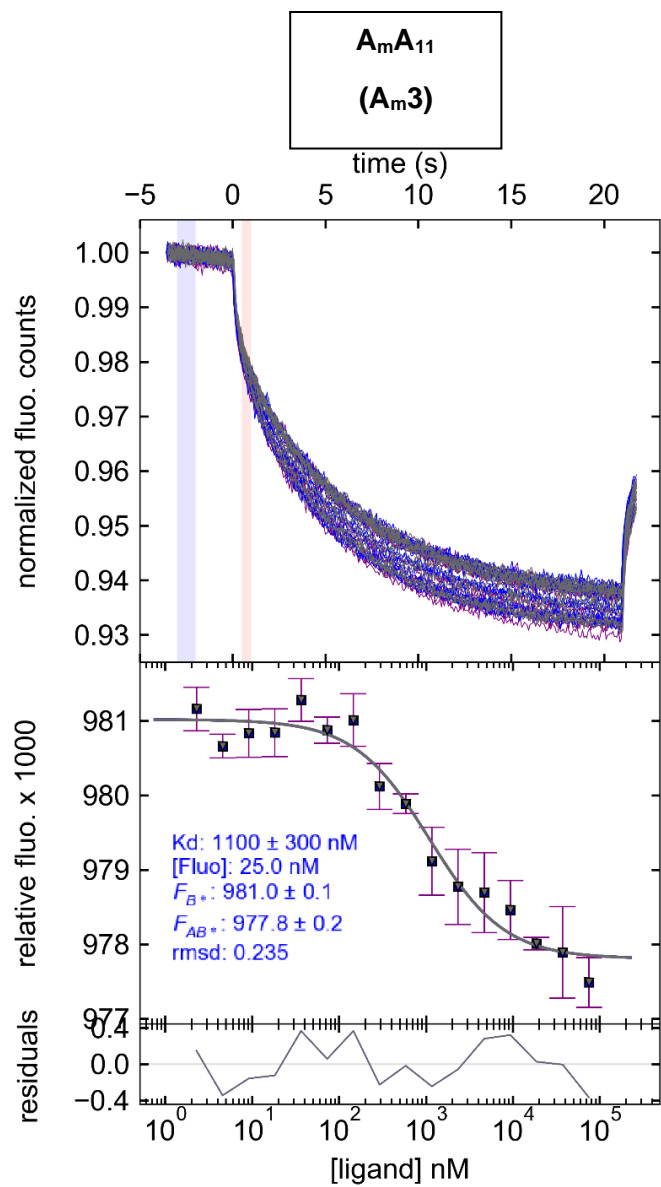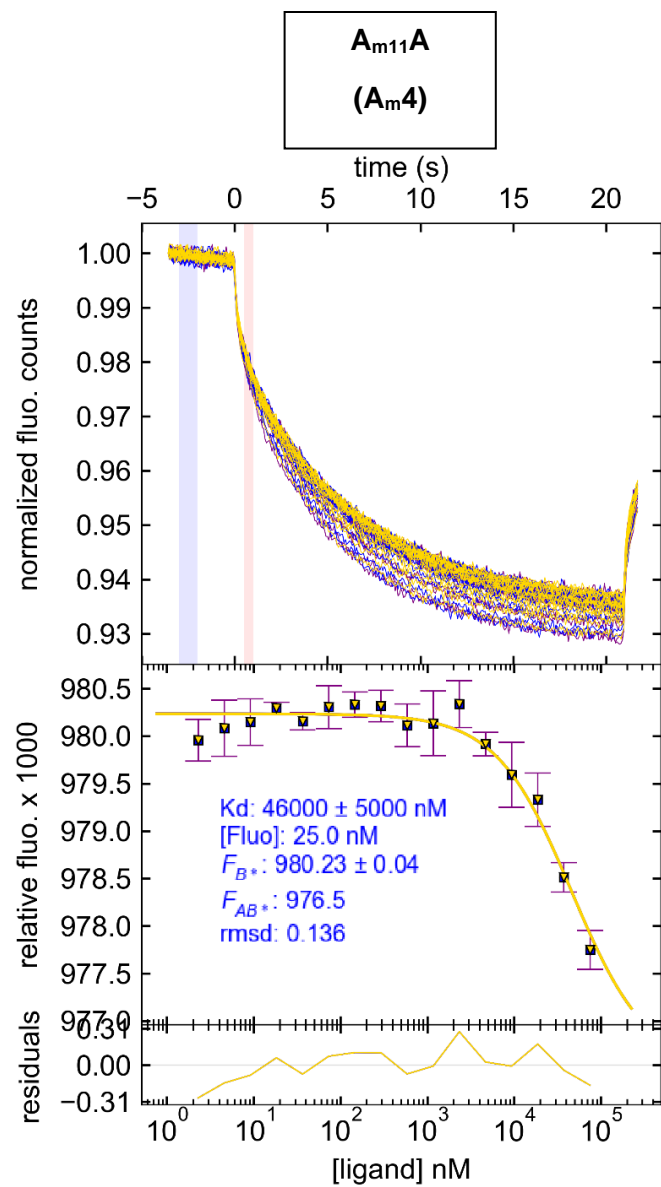

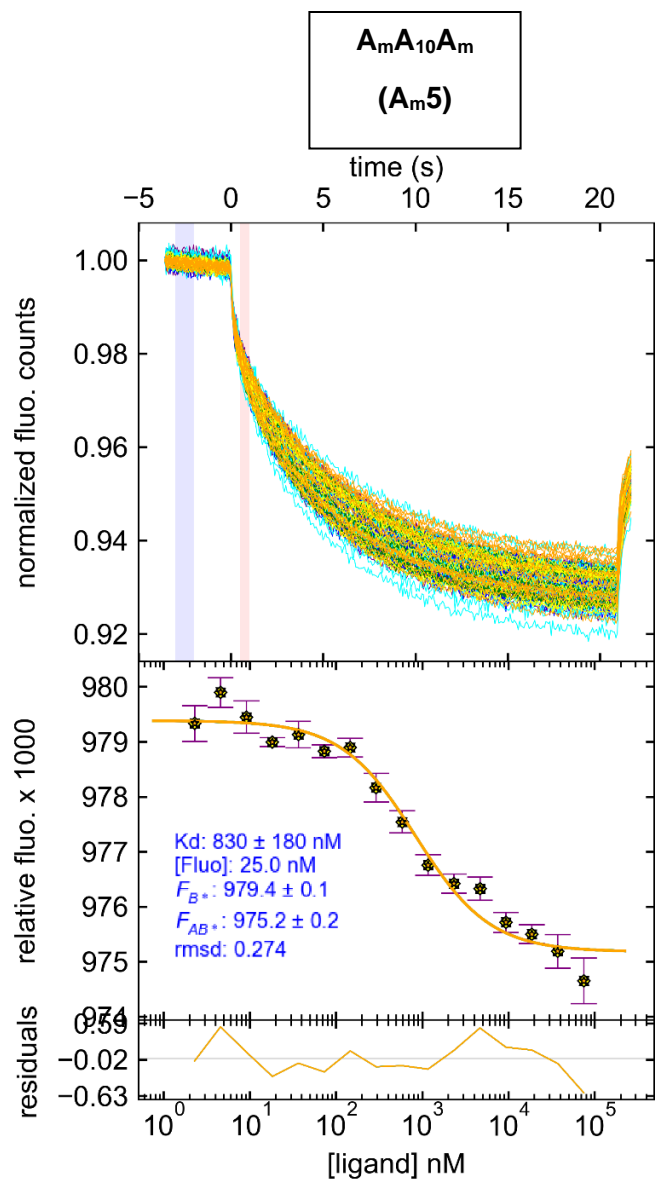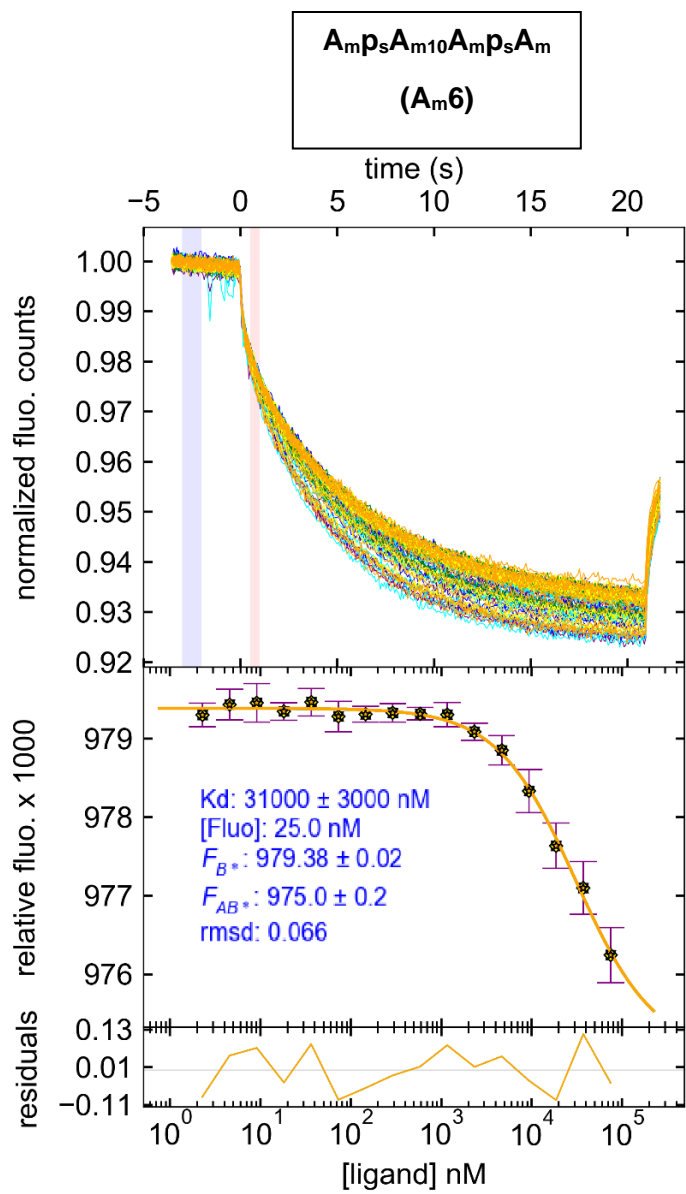



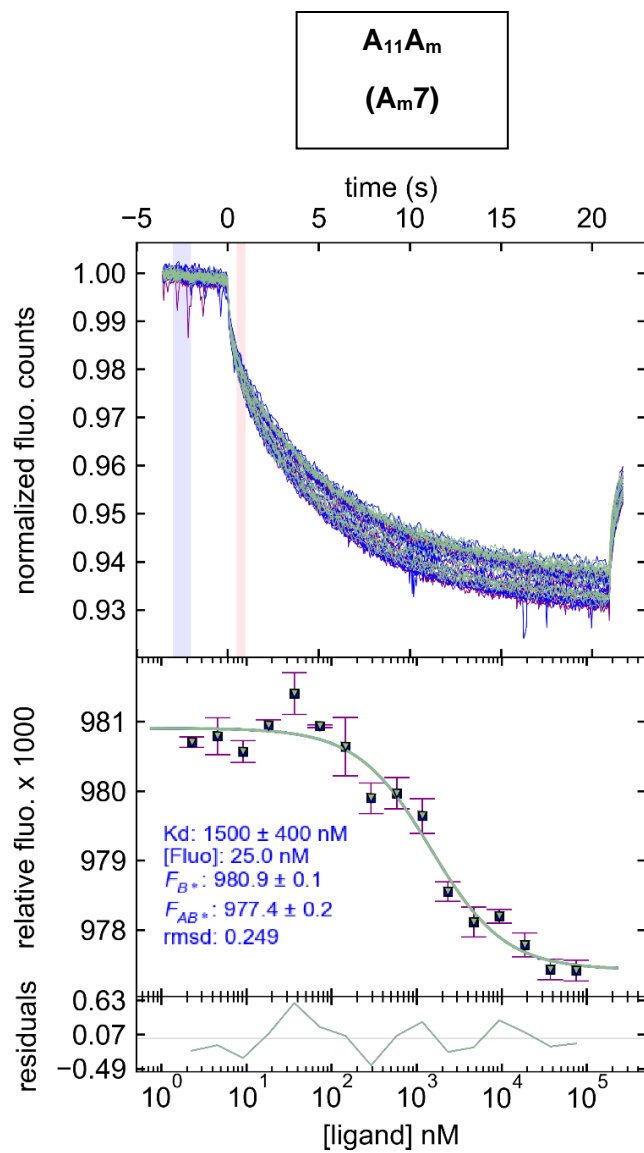

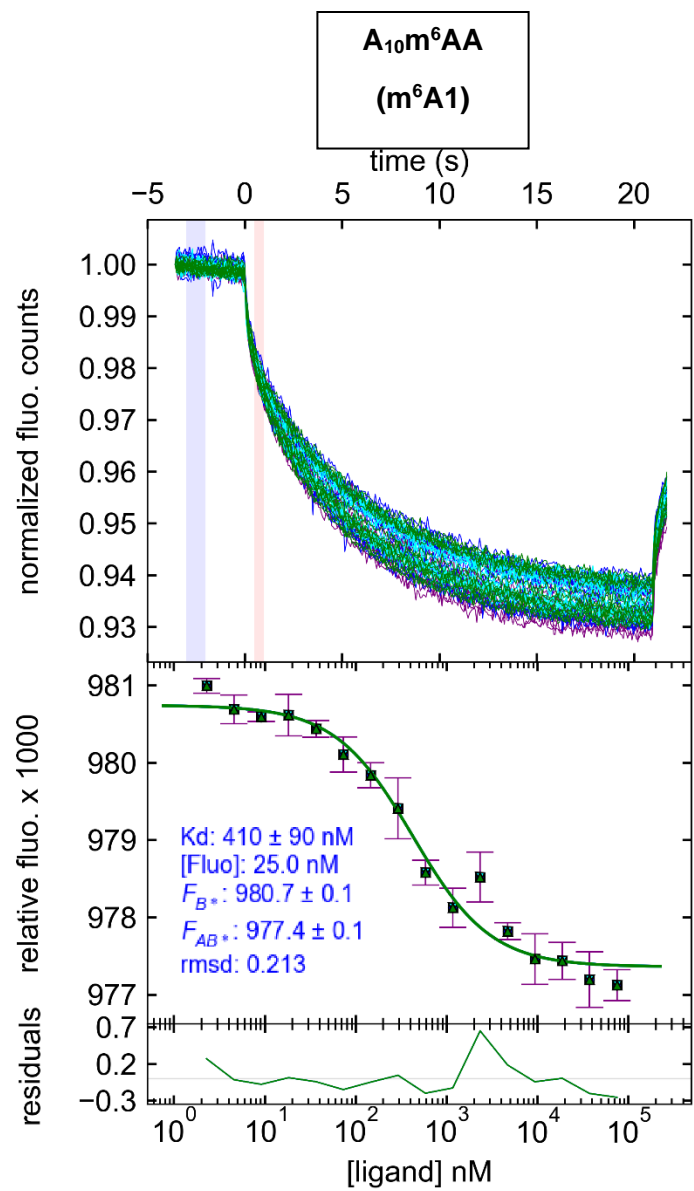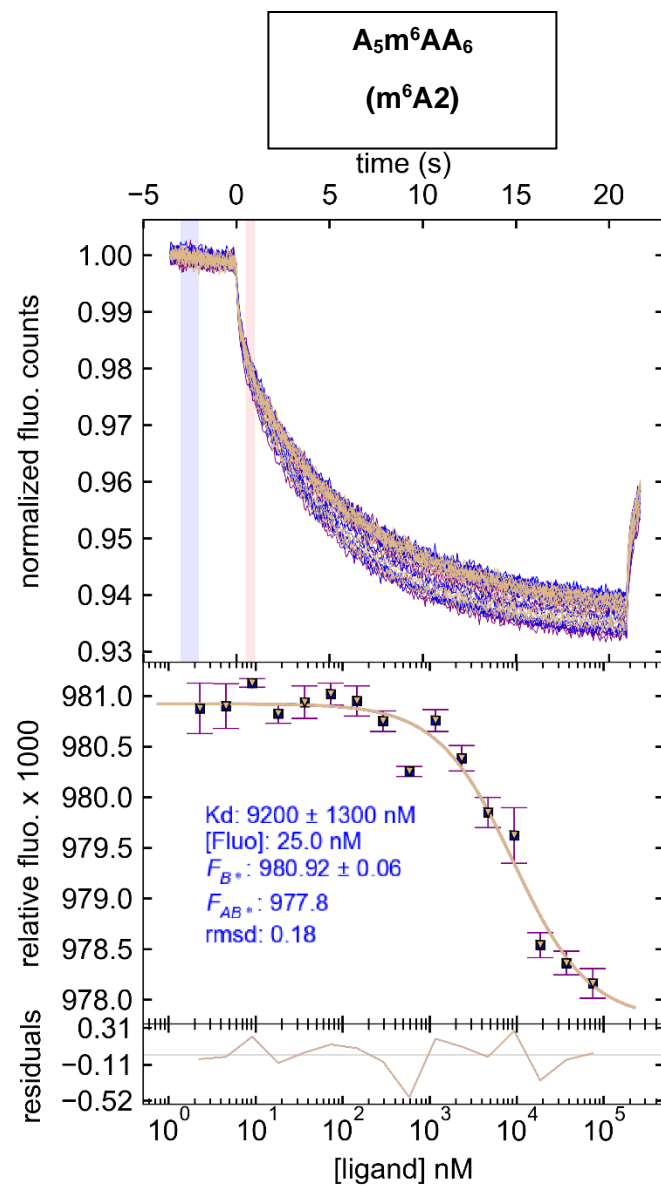

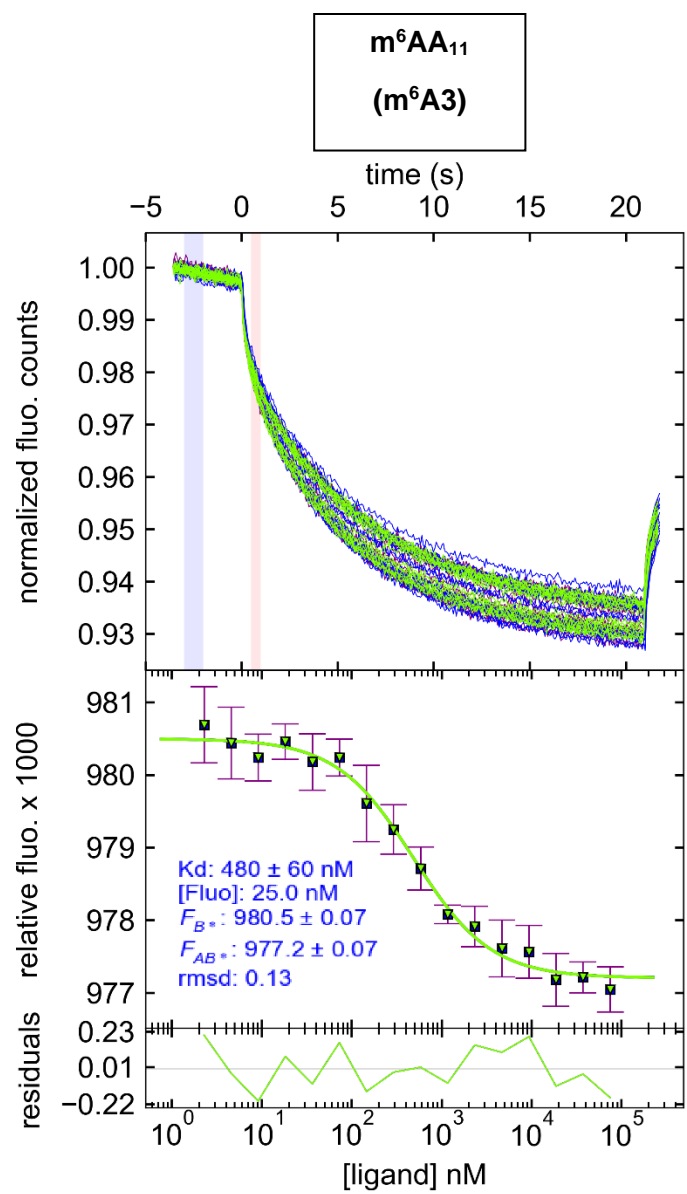

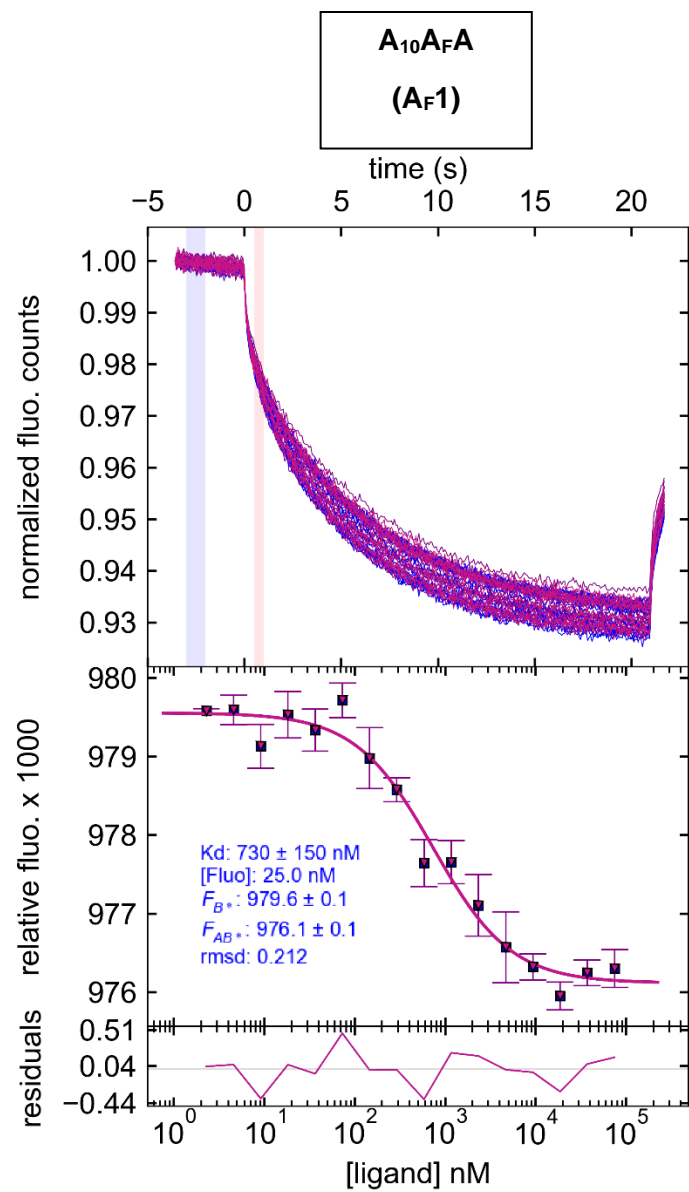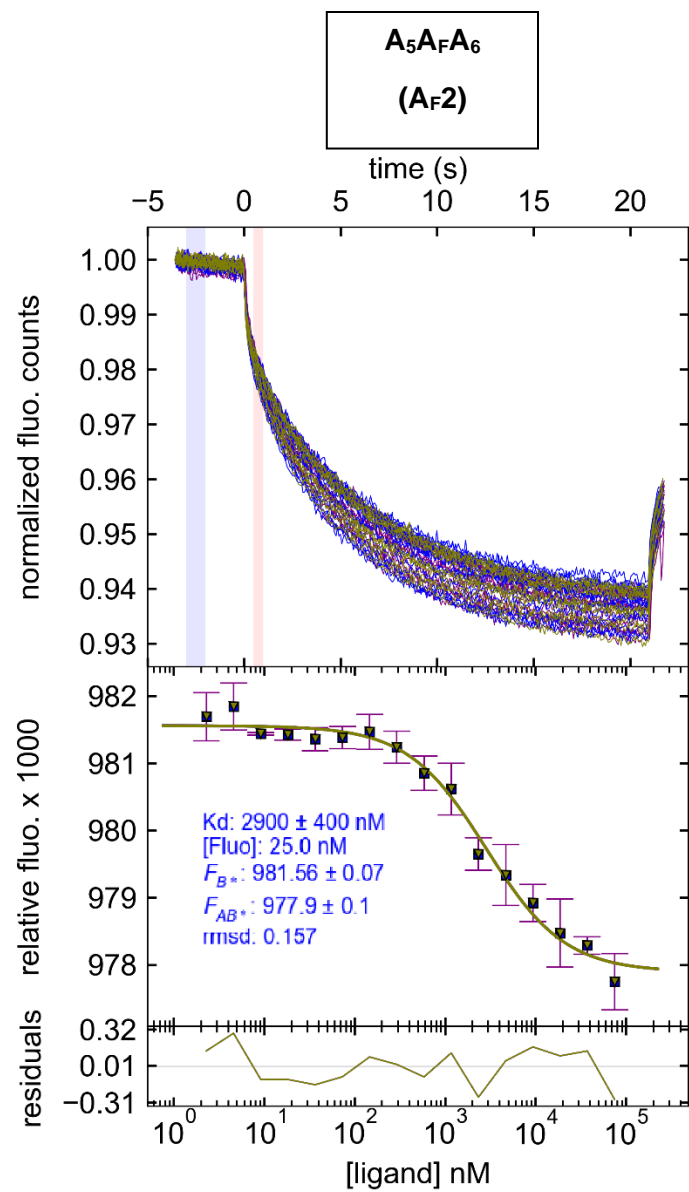

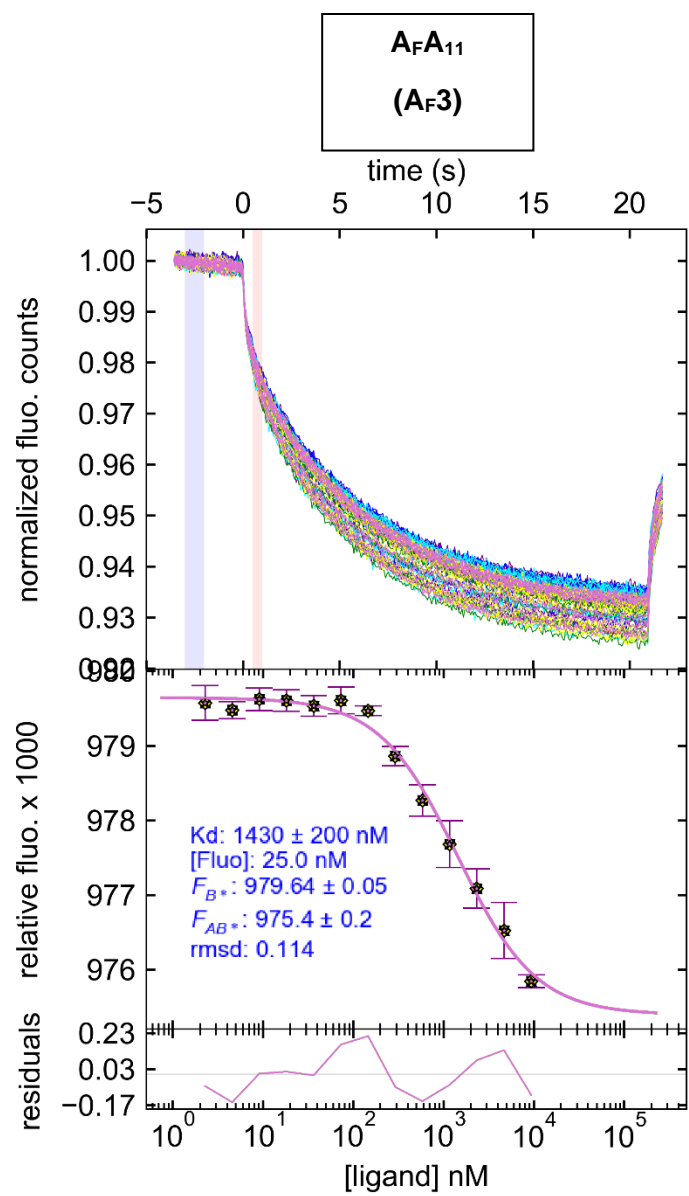

Supplement: CHEM-28-0-s001.pdf [file CHEM-28-0-s001.pdf]
